# Supplementary material for: The UK Coronavirus Job Retention Scheme and smoking, alcohol consumption and vaping during the COVID-19 pandemic: evidence from eight longitudinal population surveys
Source: Springer Nature journal article supplement (doi:10.1186/s12916-022-02511-0), 2022-09-20
Supplement: MOESM4 [file 23522828]

# Additional File 4: Stratified Results

## Results stratified by Age

|                                                                         |    |
|-------------------------------------------------------------------------|----|
| Figure set 1: Currently drinks 4+ days/week or 5+ drinks/occasion ..... | 3  |
| Figure set 2: Increased alcohol consumption .....                       | 5  |
| Figure set 3: Reduced alcohol consumption.....                          | 7  |
| Figure set 4: Drinks 5+ drinks/occasion.....                            | 9  |
| Figure set 5: Drinks more alcohol units per occasion .....              | 10 |
| Figure set 6: Drinks fewer alcohol units per occasion.....              | 12 |
| Figure set 7: Currently drinks 4+ days/week.....                        | 14 |
| Figure set 8: Drinks more frequently.....                               | 16 |
| Figure set 9: Drinks less frequently .....                              | 18 |
| Figure set 10: Current smoker .....                                     | 20 |
| Figure set 11: Smoking more.....                                        | 22 |
| Figure set 12: Smoking less.....                                        | 24 |
| Figure set 13: Current vaper .....                                      | 26 |
| Figure set 14: Vaping more .....                                        | 28 |
| Figure set 15: Vaping less .....                                        | 30 |

## Results stratified by Education

|                                                                          |    |
|--------------------------------------------------------------------------|----|
| Figure set 16: Currently drinks 4+ days/week or 5+ drinks/occasion ..... | 32 |
| Figure set 17: Increased alcohol consumption .....                       | 35 |
| Figure set 18: Reduced alcohol consumption.....                          | 37 |
| Figure set 19: Currently drinks 5+ drinks/occasions .....                | 39 |
| Figure set 20: Drinks more alcohol units per occasions.....              | 41 |
| Figure set 21: Drinks fewer alcohol units per occasions .....            | 43 |
| Figure set 22: Currently drinks 4+ days/week.....                        | 45 |
| Figure set 23: Drinks more frequently.....                               | 47 |
| Figure set 24: Drinks less frequently .....                              | 49 |
| Figure set 24: Current smoker .....                                      | 51 |
| Figure set 26: Smoking more.....                                         | 53 |
| Figure set 27: Smoking less.....                                         | 54 |
| Figure set 28: Current vaper .....                                       | 56 |
| Figure set 29: Vaping more .....                                         | 58 |
| Figure set 30: Vaping less .....                                         | 60 |

## Results stratified by Sex

|                                                                          |    |
|--------------------------------------------------------------------------|----|
| Figure set 31: Currently drinks 4+ days/week or 5+ drinks/occasion ..... | 62 |
| Figure set 32: Increased alcohol consumption .....                       | 65 |
| Figure set 33: Reduced alcohol consumption.....                          | 67 |
| Figure set 34: Currently drinks 5+ drinks/occasion.....                  | 69 |
| Figure set 35: Drinks more alcohol units per occasion .....              | 71 |
| Figure set 36: Drinks fewer alcohol units per occasion.....              | 73 |
| Figure set 37: Currently drinks 4+ days/week.....                        | 75 |
| Figure set 38: Drinks more frequently.....                               | 77 |
| Figure set 39: Drinks less frequently .....                              | 79 |
| Figure set 40: Current smoker .....                                      | 81 |
| Figure set 41: Smoking more.....                                         | 83 |
| Figure set 42: Smoking less.....                                         | 85 |
| Figure set 43: Current vaper .....                                       | 87 |
| Figure set 44: Vaping more .....                                         | 89 |
| Figure set 45: Vaping less .....                                         | 91 |

Notes: Moderation by age, education, and sex was assessed with stratified regressions using “full” adjustment that includes socio-demographic characteristics as well as pre-pandemic measures of psychological distress, self-rated health, and health behaviours.

# Figure set 1: Currently drinks 4+ days/week or 5+ drinks/occasion

Currently drinks 4+days/week or 5+ drinks/occasion)  
Furloughed vs. Stable employed

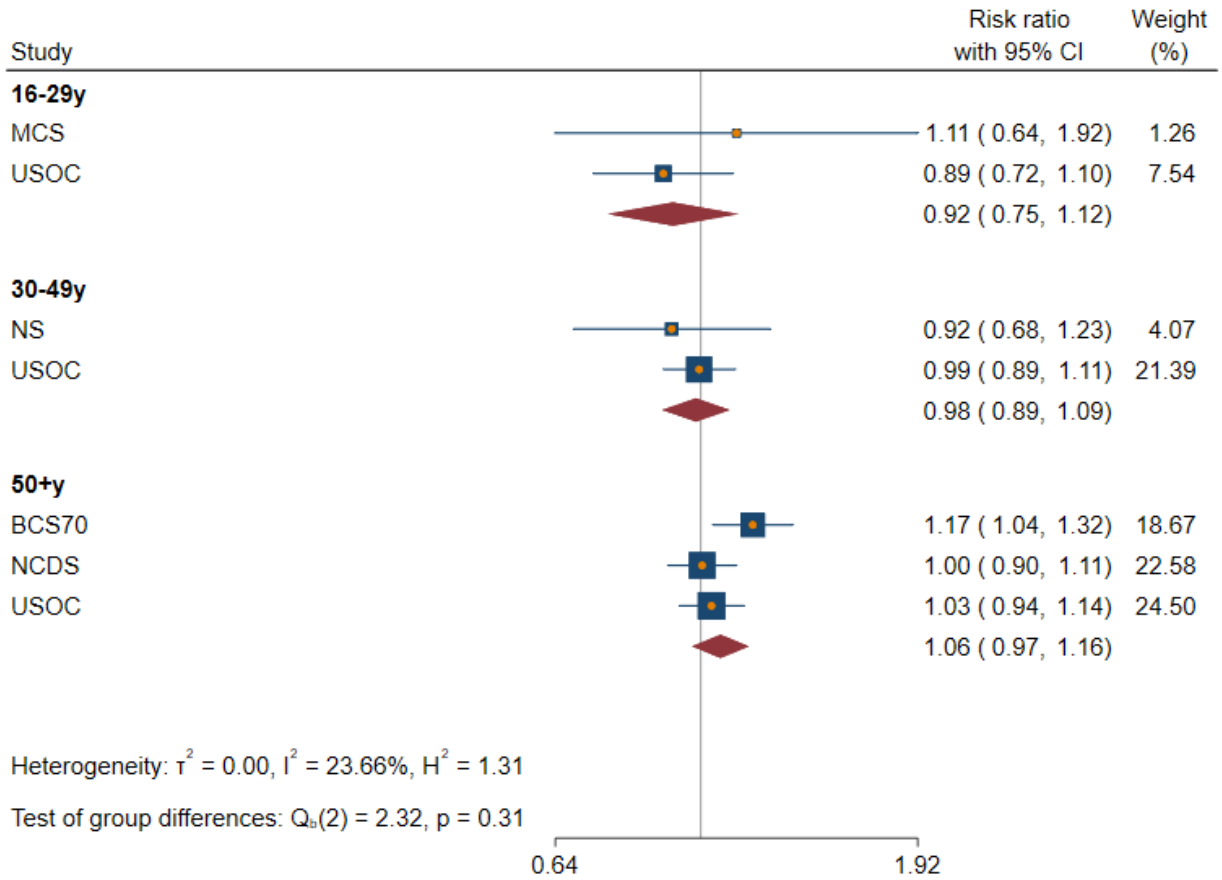

Random-effects REML model

Currently drinks 4+days/week or 5+ drinks/occasion)  
No longer employed vs. Stable employed

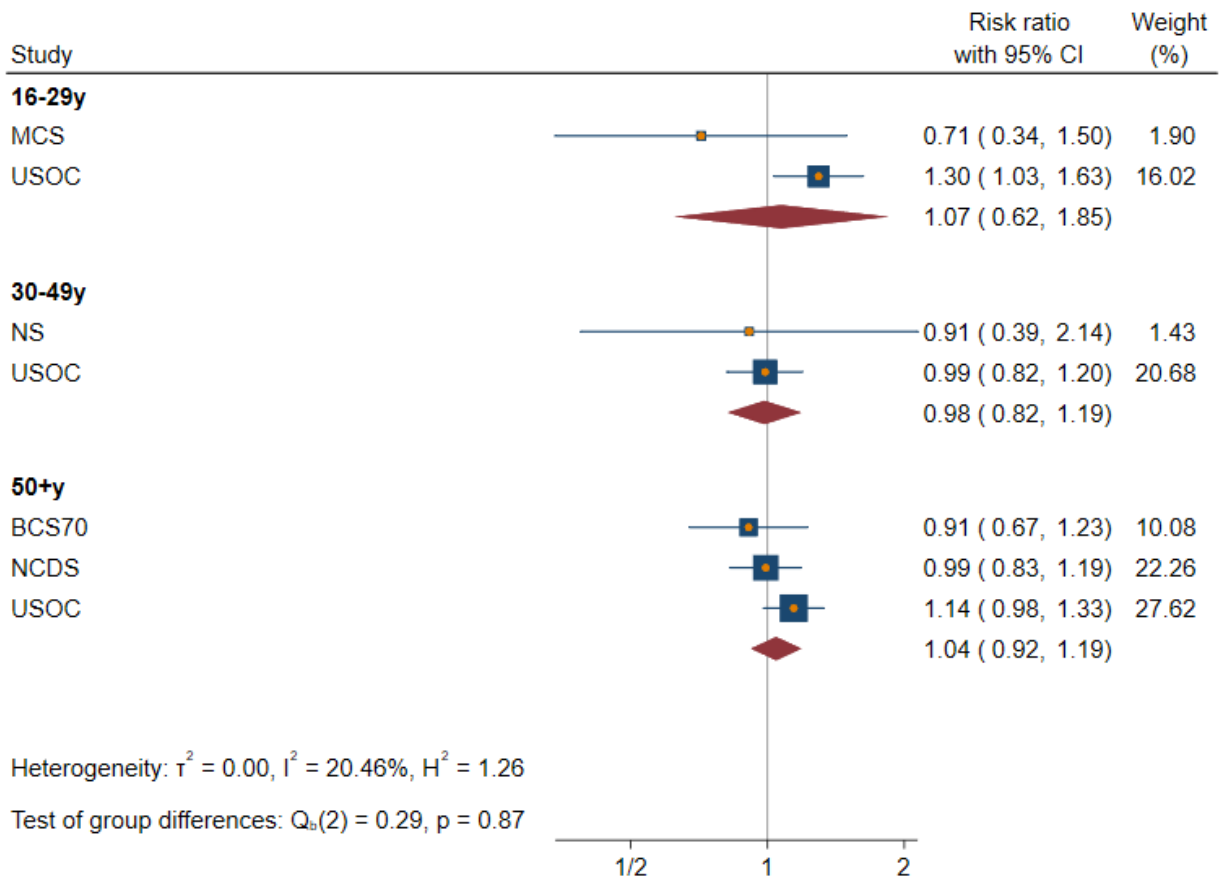

Random-effects REML model

Currently drinks 4+days/week or 5+ drinks/occasion)  
Stable unemployed vs. Stable employed

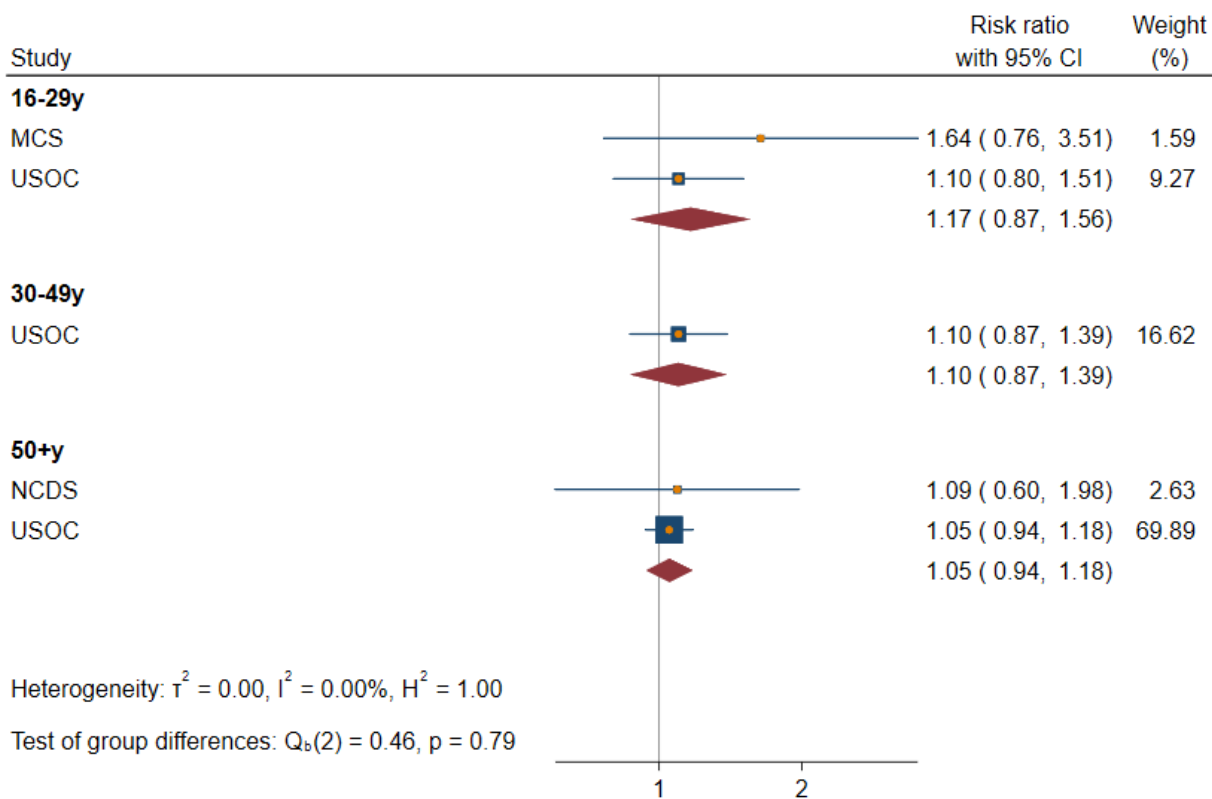

Random-effects REML model

## Figure set 2: Increased alcohol consumption

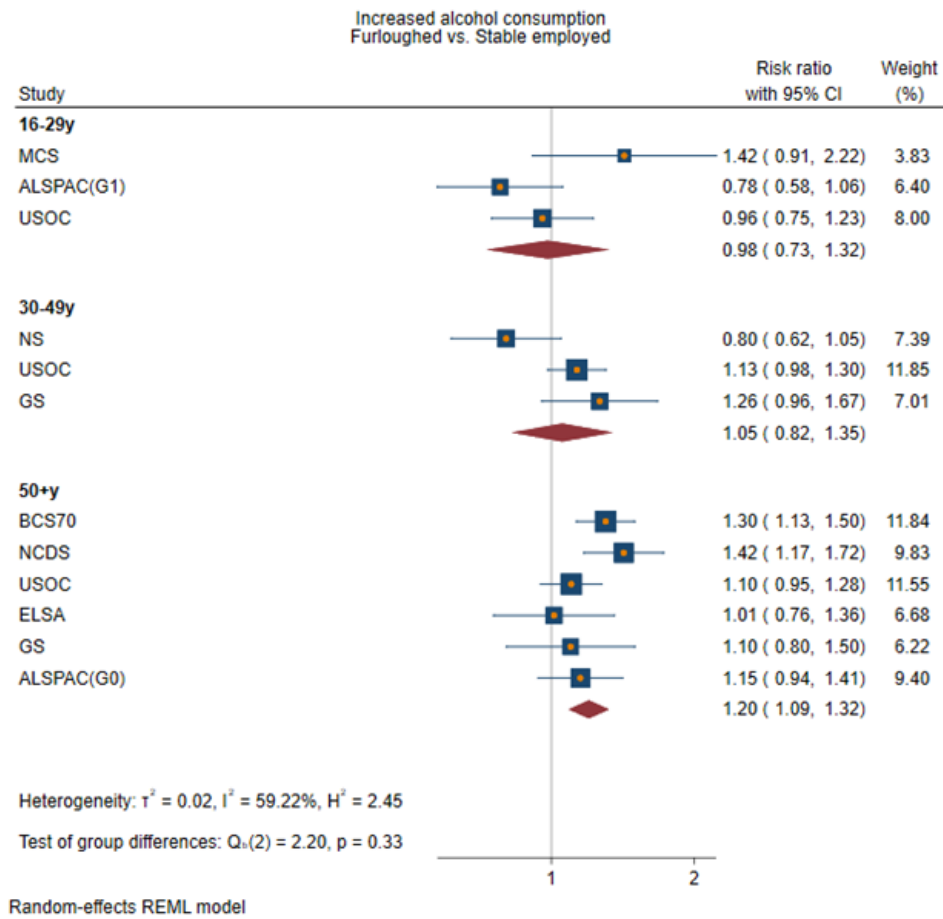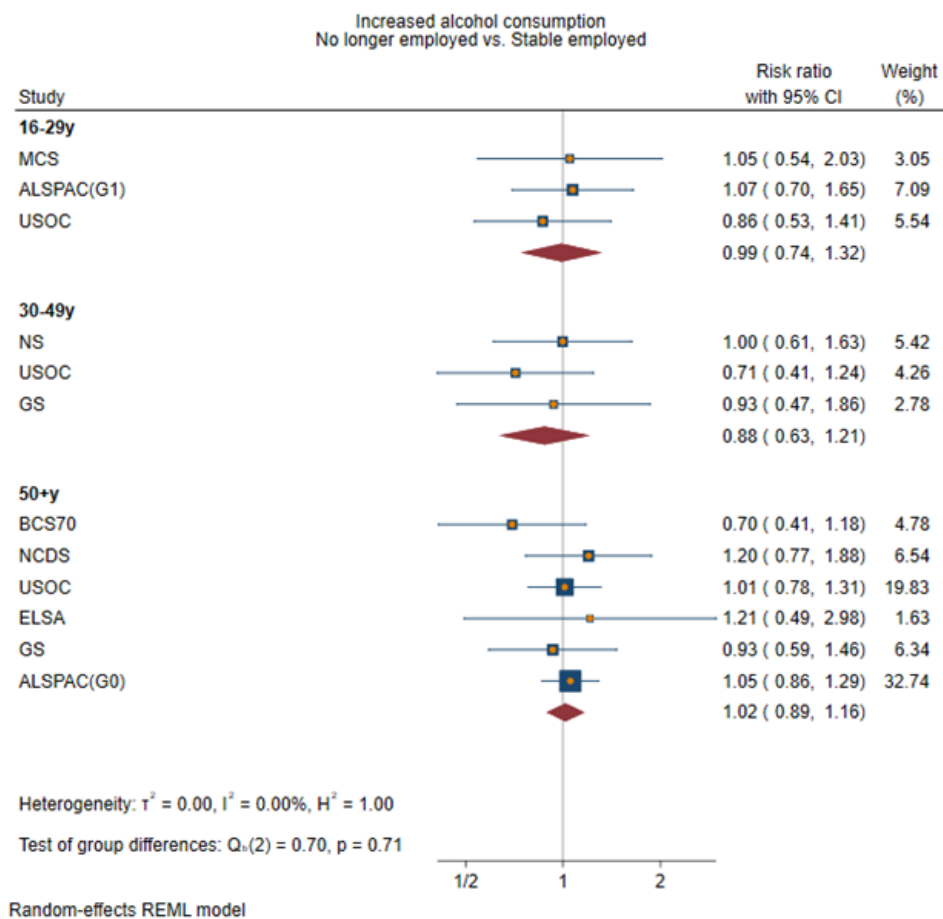

Increased alcohol consumption  
Stable unemployed vs. Stable employed

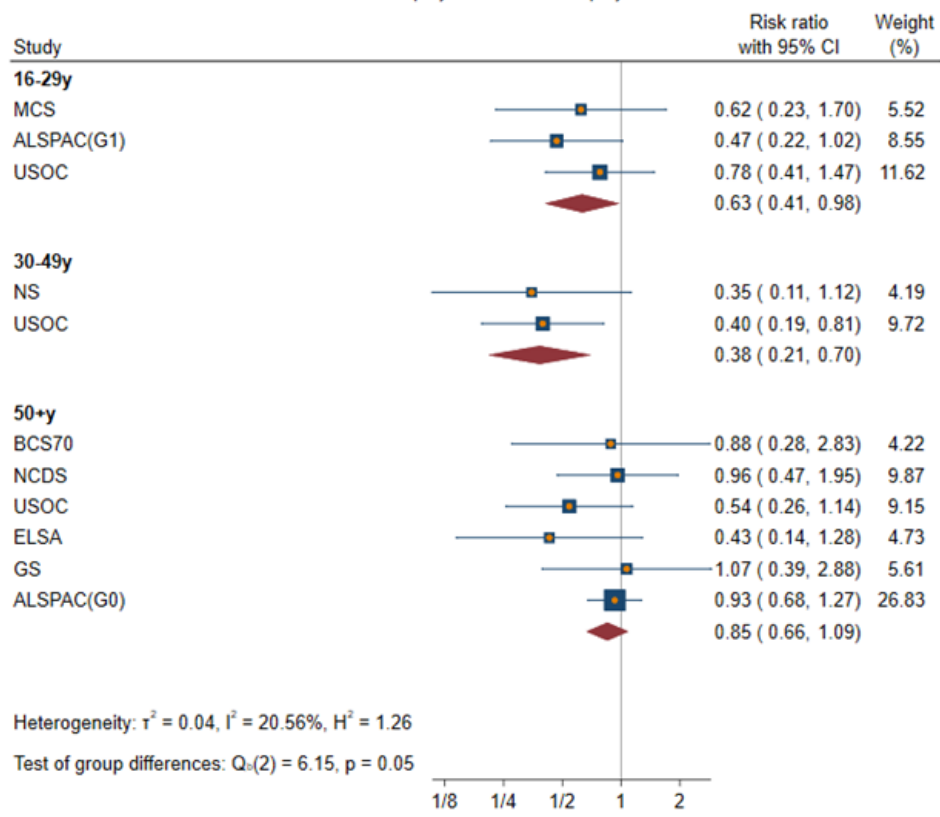

### Figure set 3: Reduced alcohol consumption

Reduced alcohol consumption  
Furloughed vs. Stable employed

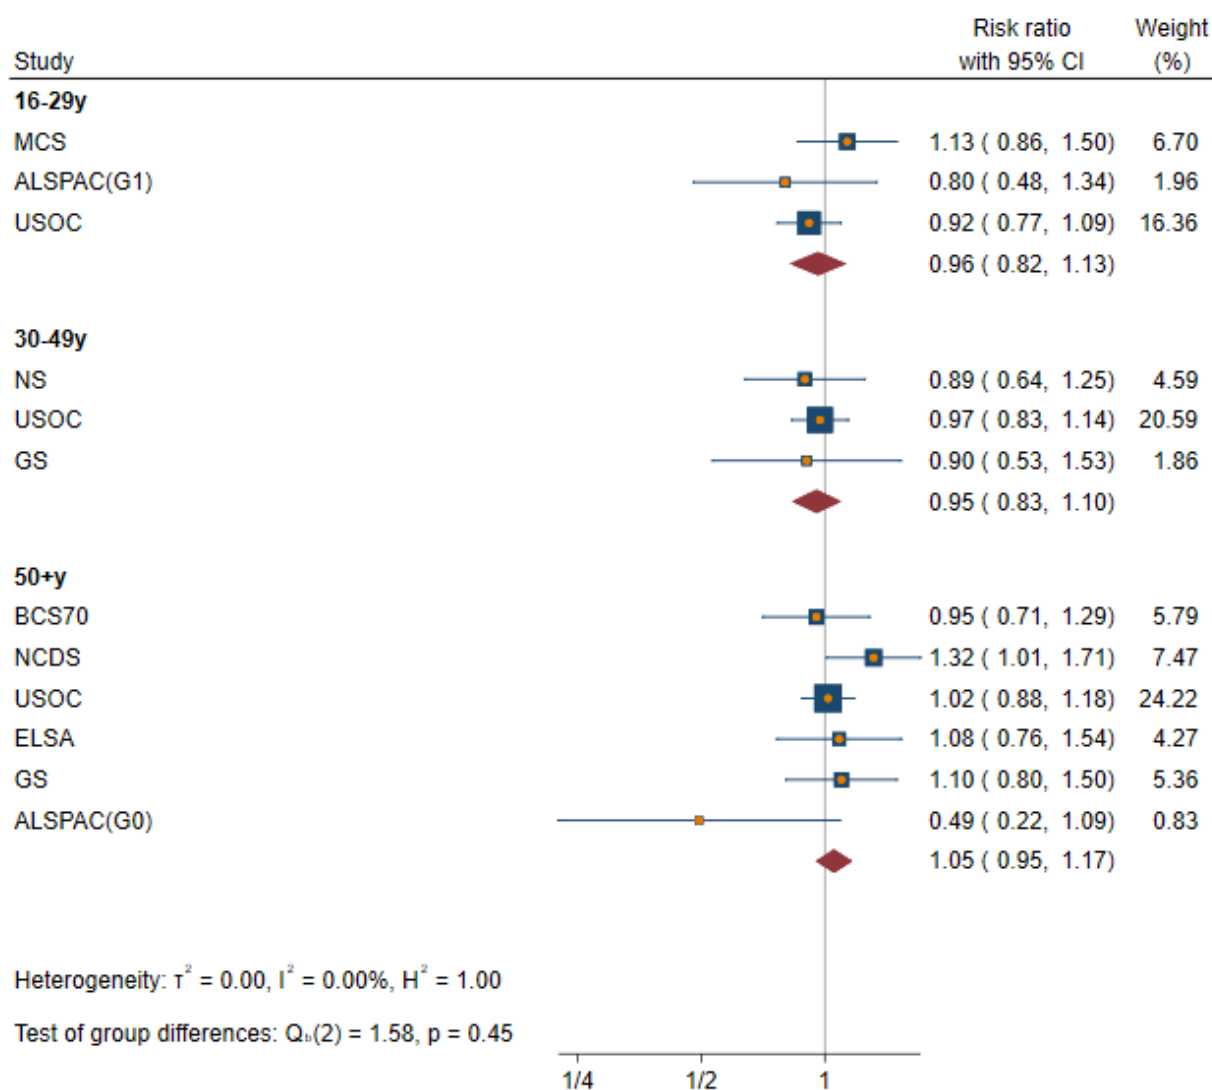

Random-effects REML model

Reduced alcohol consumption  
No longer employed vs. Stable employed

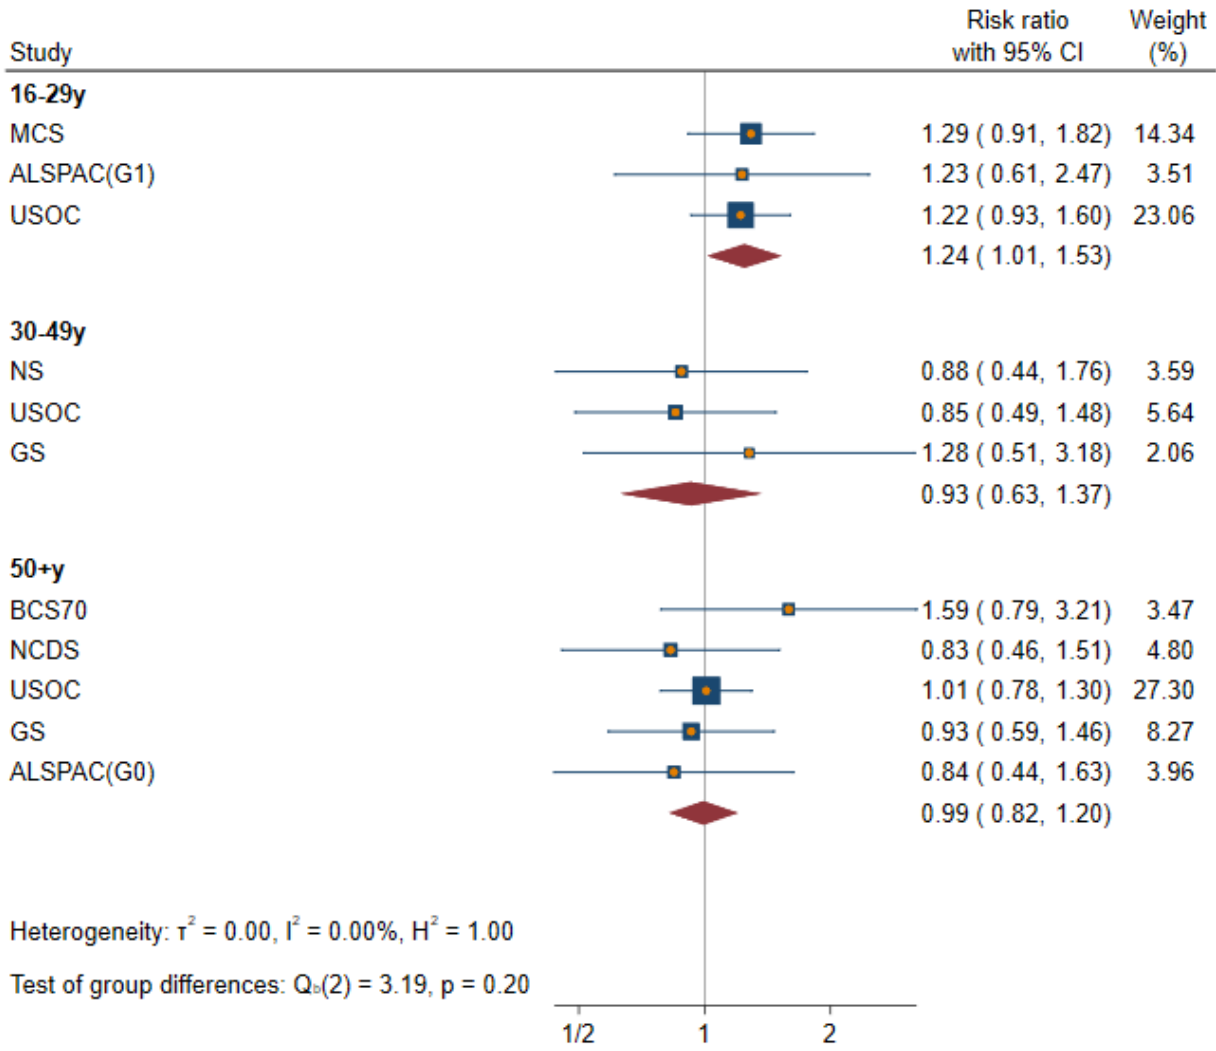

Random-effects REML model

Reduced alcohol consumption  
Stable unemployed vs. Stable employed

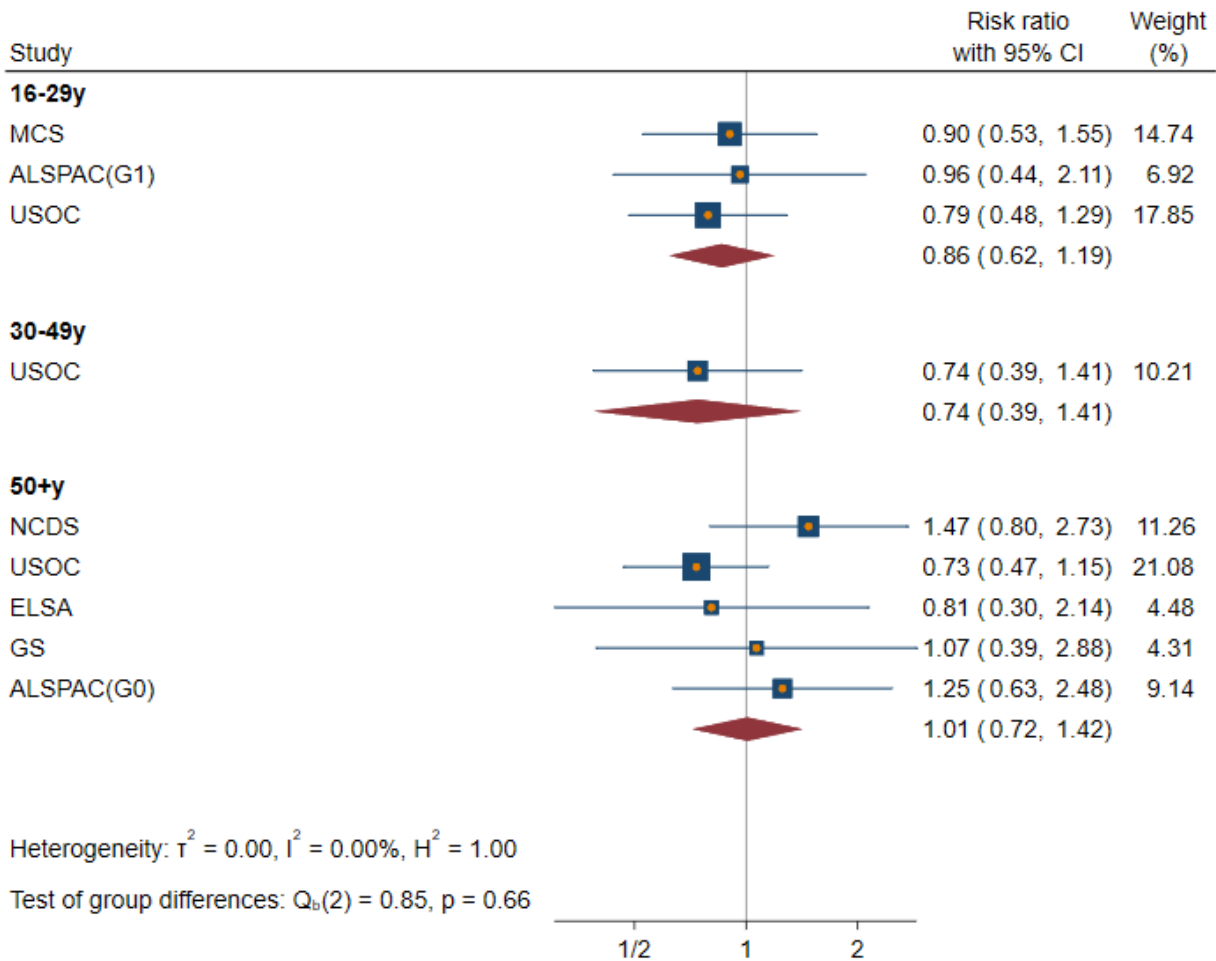

Random-effects REML model



## Figure set 4: Drinks 5+ drinks/occasion

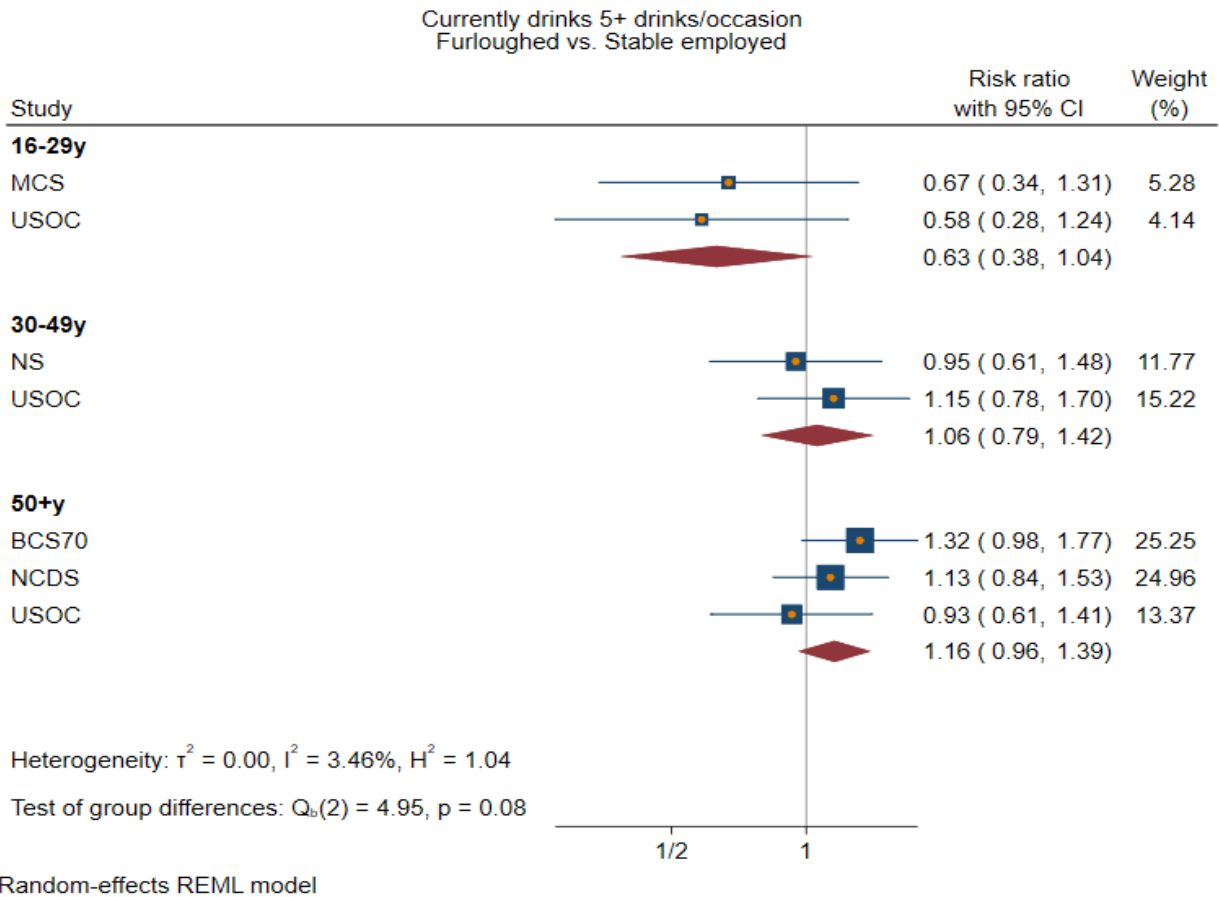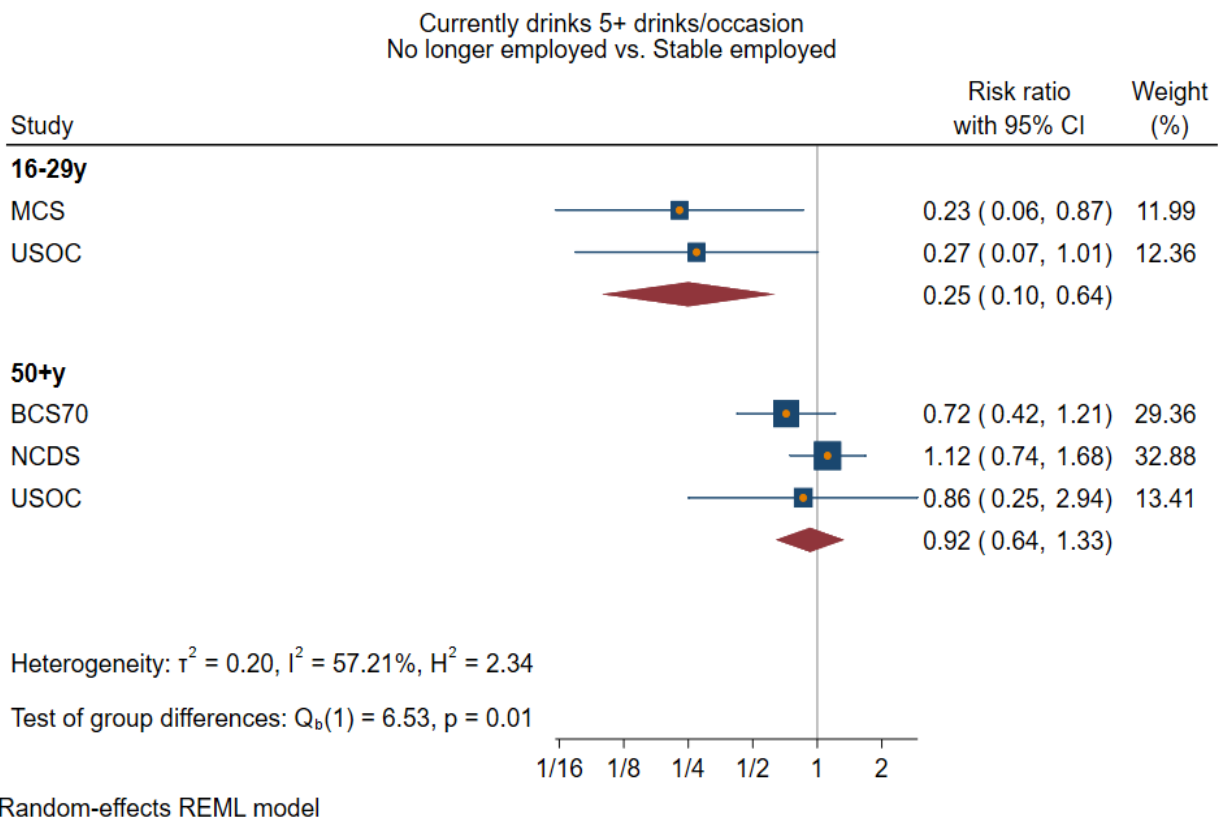

Currently drinks 5+ drinks/occasion  
Stable unemployed vs. Stable employed

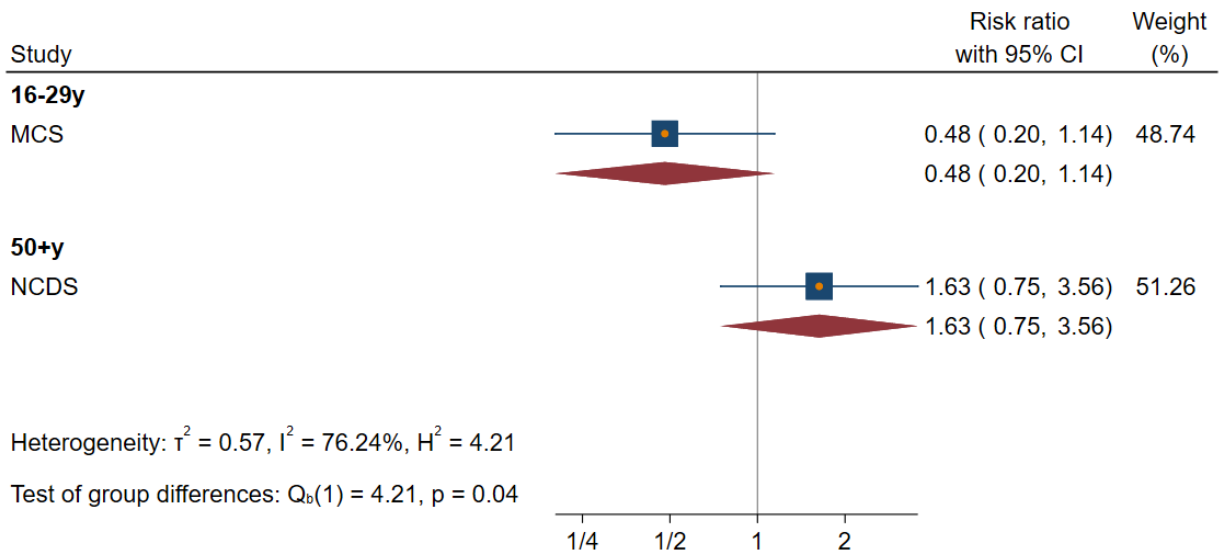

Random-effects REML model

### Figure set 5: Drinks more alcohol units per occasion

Drinks more alcohol units per occasion  
Furloughed vs. Stable employed

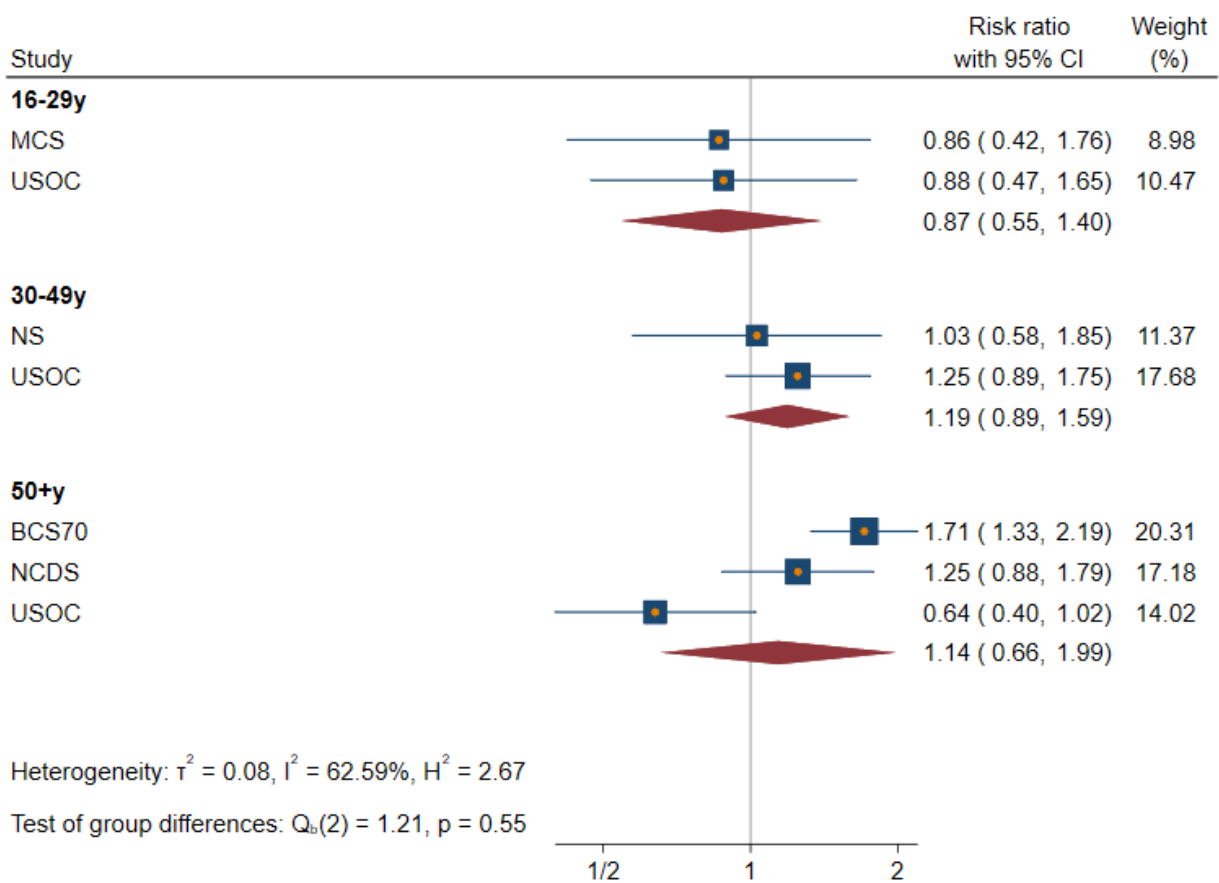

Random-effects REML model

Drinks more alcohol units per occasion  
No longer employed vs. Stable employed

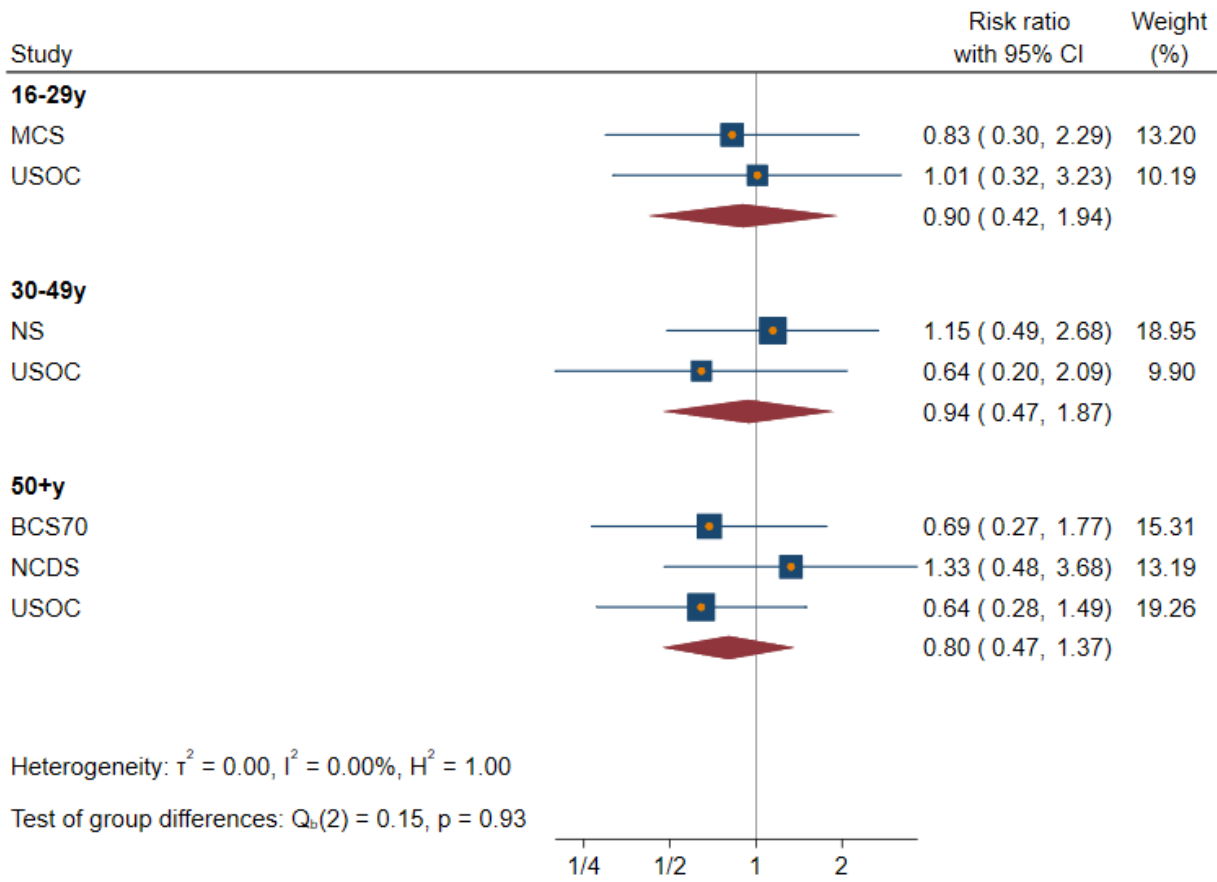

Random-effects REML model

Drinks more alcohol units per occasion  
Stable unemployed vs. Stable employed

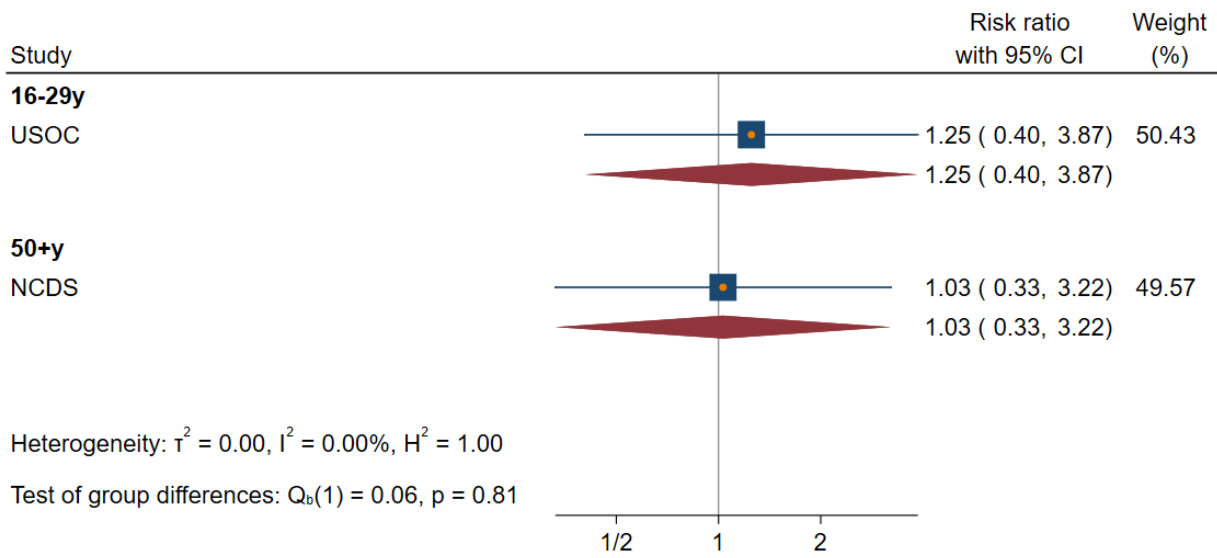

Random-effects REML model



Drinks fewer alcohol units per occasion  
Stable unemployed vs. Stable employed

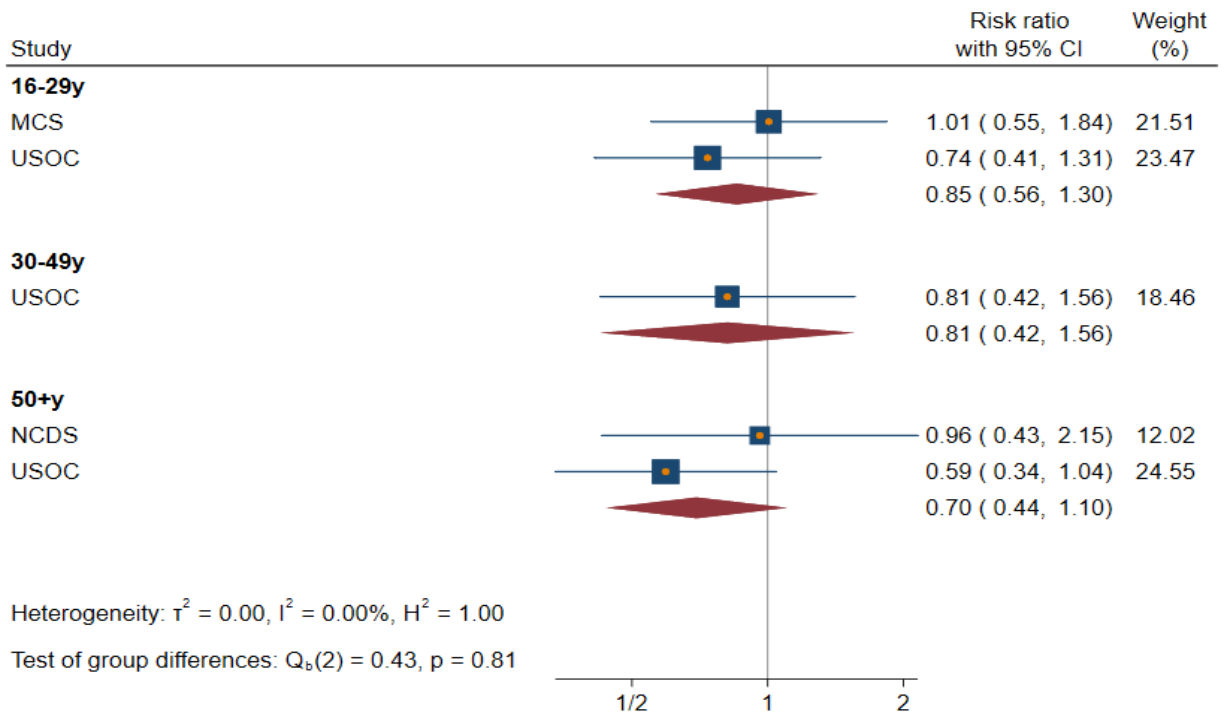

## Figure set 7: Currently drinks 4+ days/week

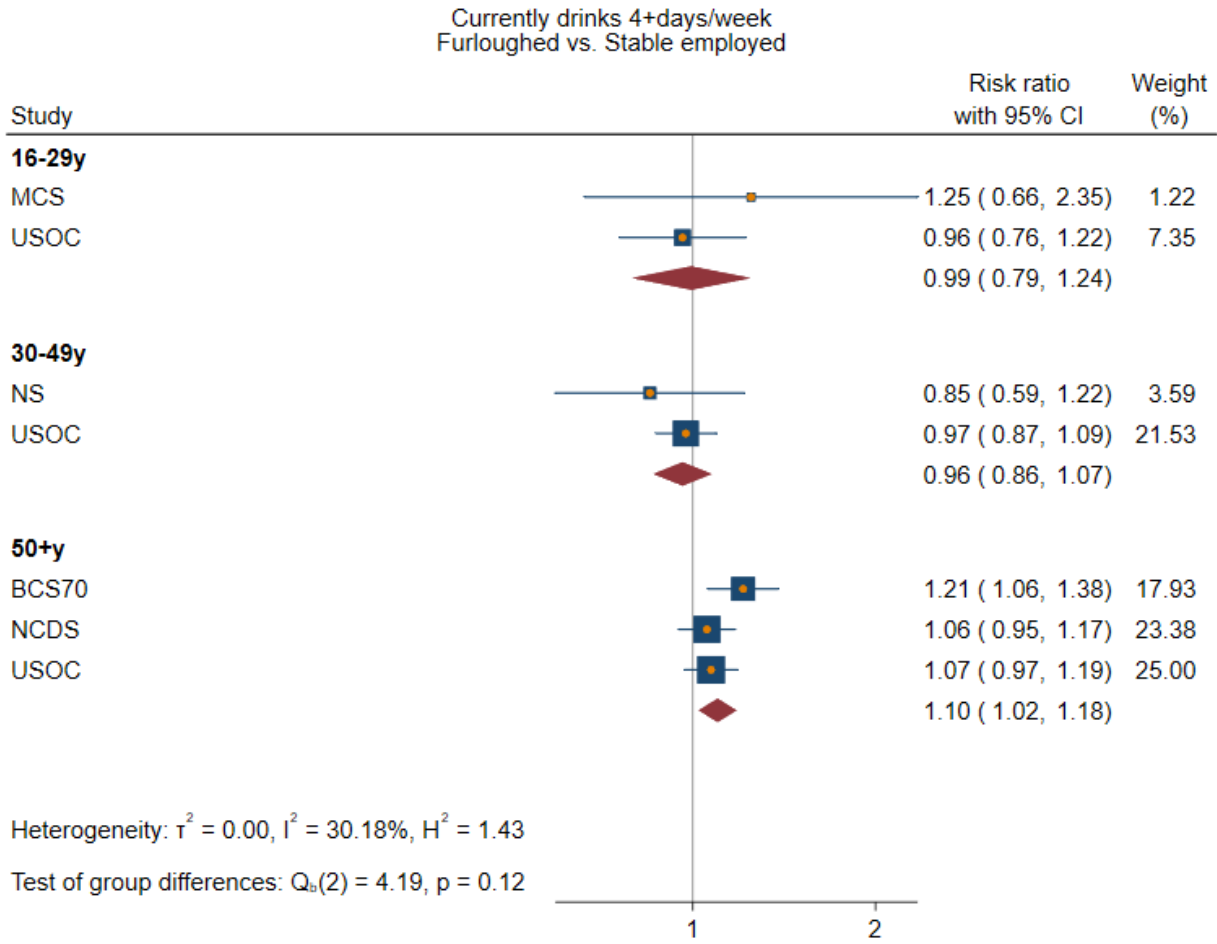

Random-effects REML model

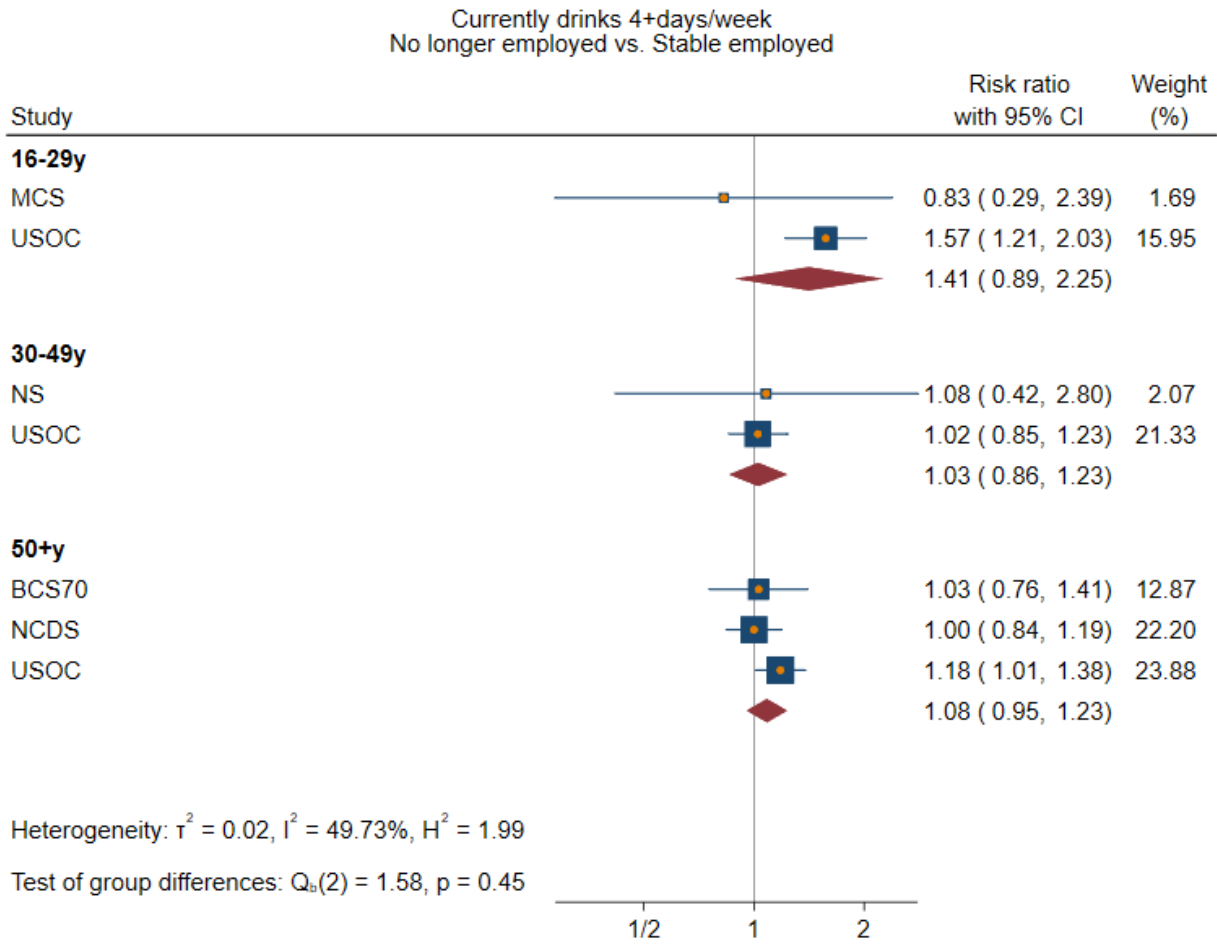

Random-effects REML model

Currently drinks 4+days/week  
Stable unemployed vs. Stable employed

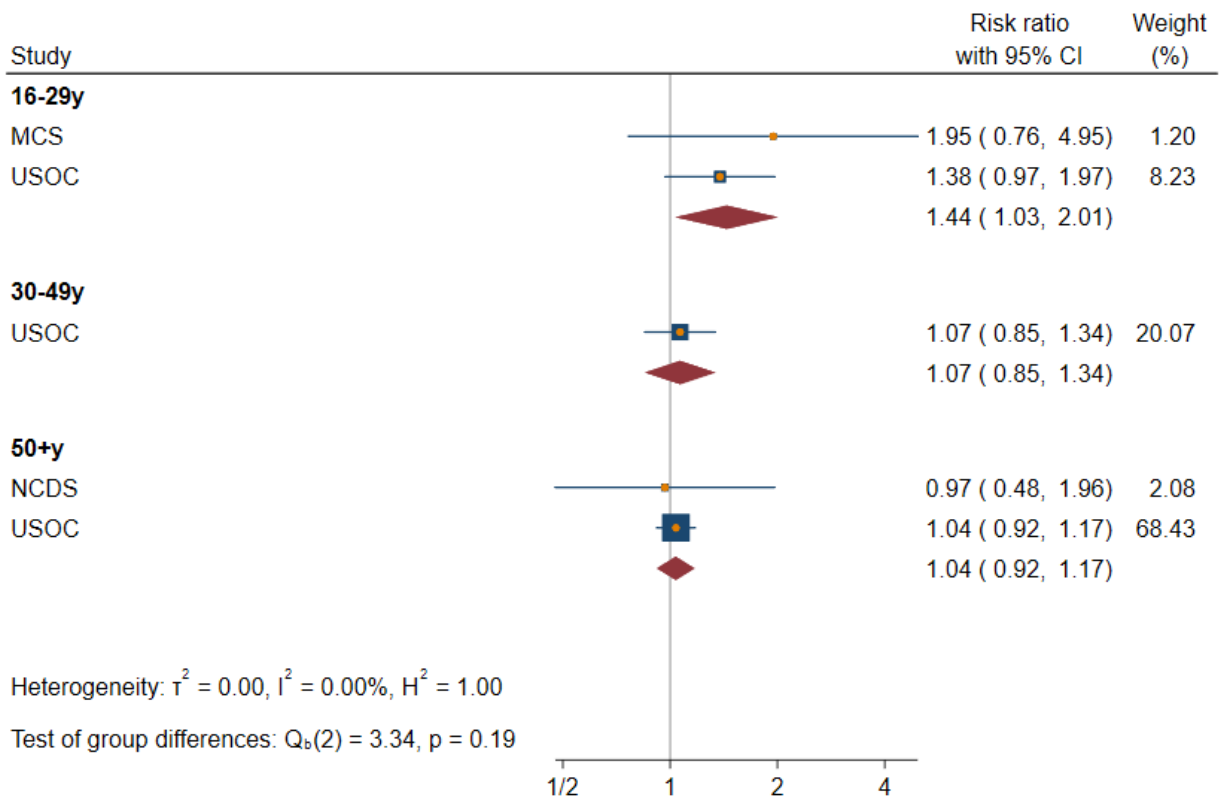

Random-effects REML model

## Figure set 8: Drinks more frequently

Drinks more frequently  
Furloughed vs. Stable employed

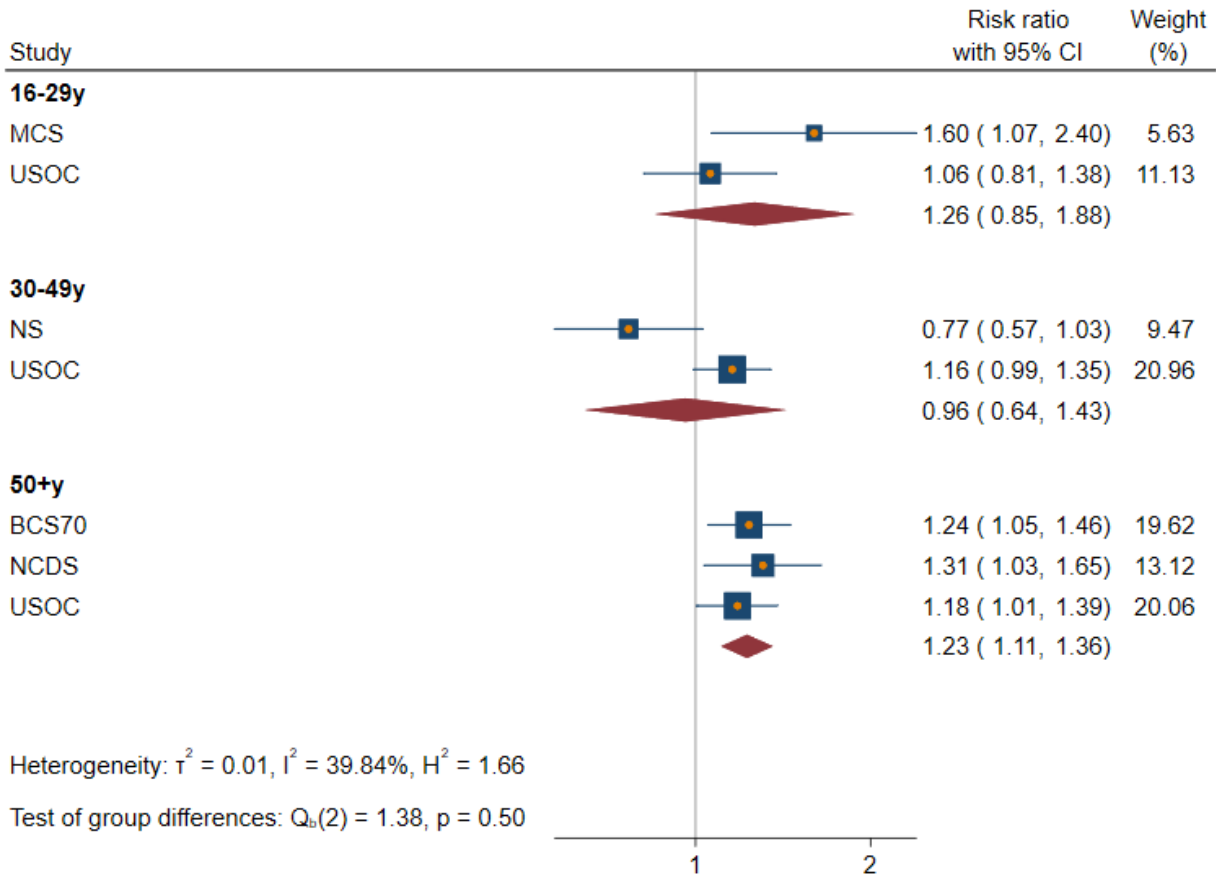

Random-effects REML model

Drinks more frequently  
No longer employed vs. Stable employed

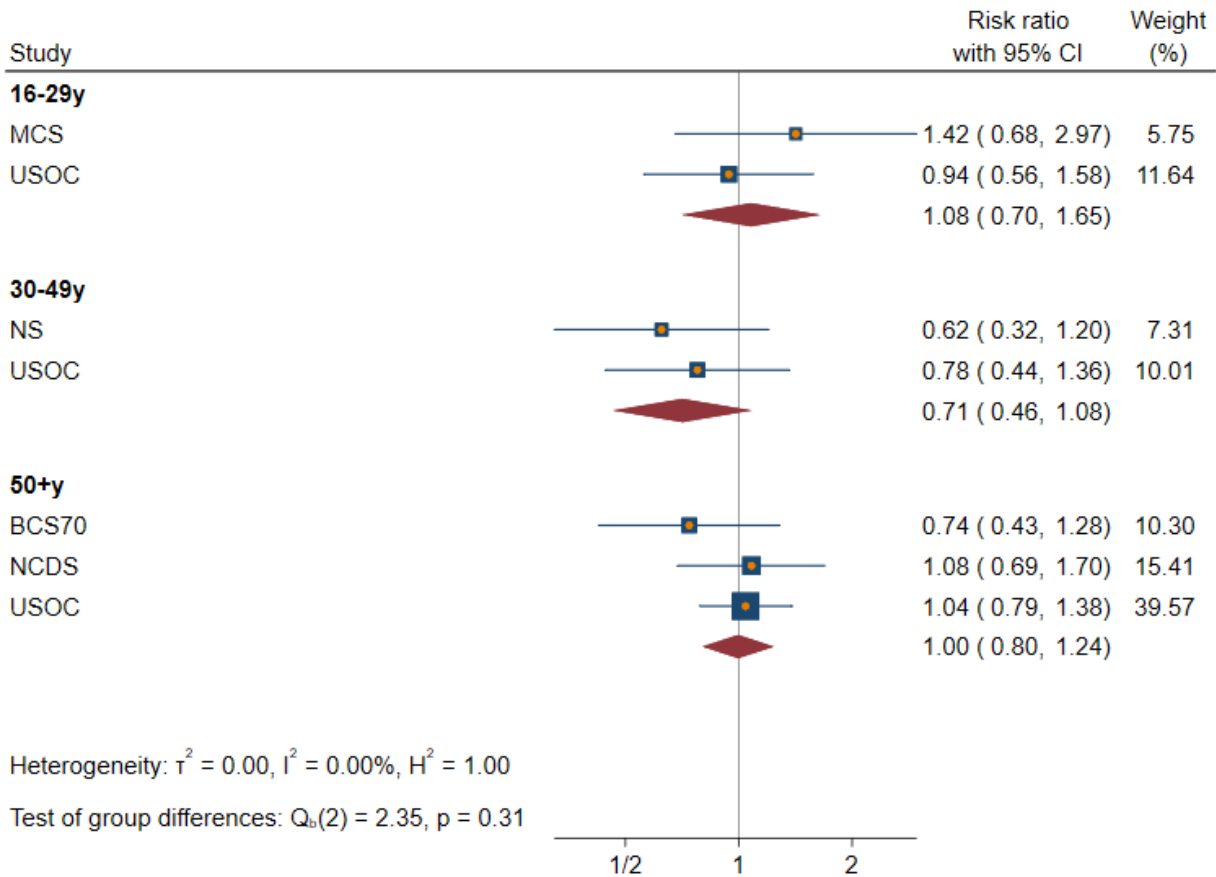

Random-effects REML model



Drinks more frequently  
Stable unemployed vs. Stable employed

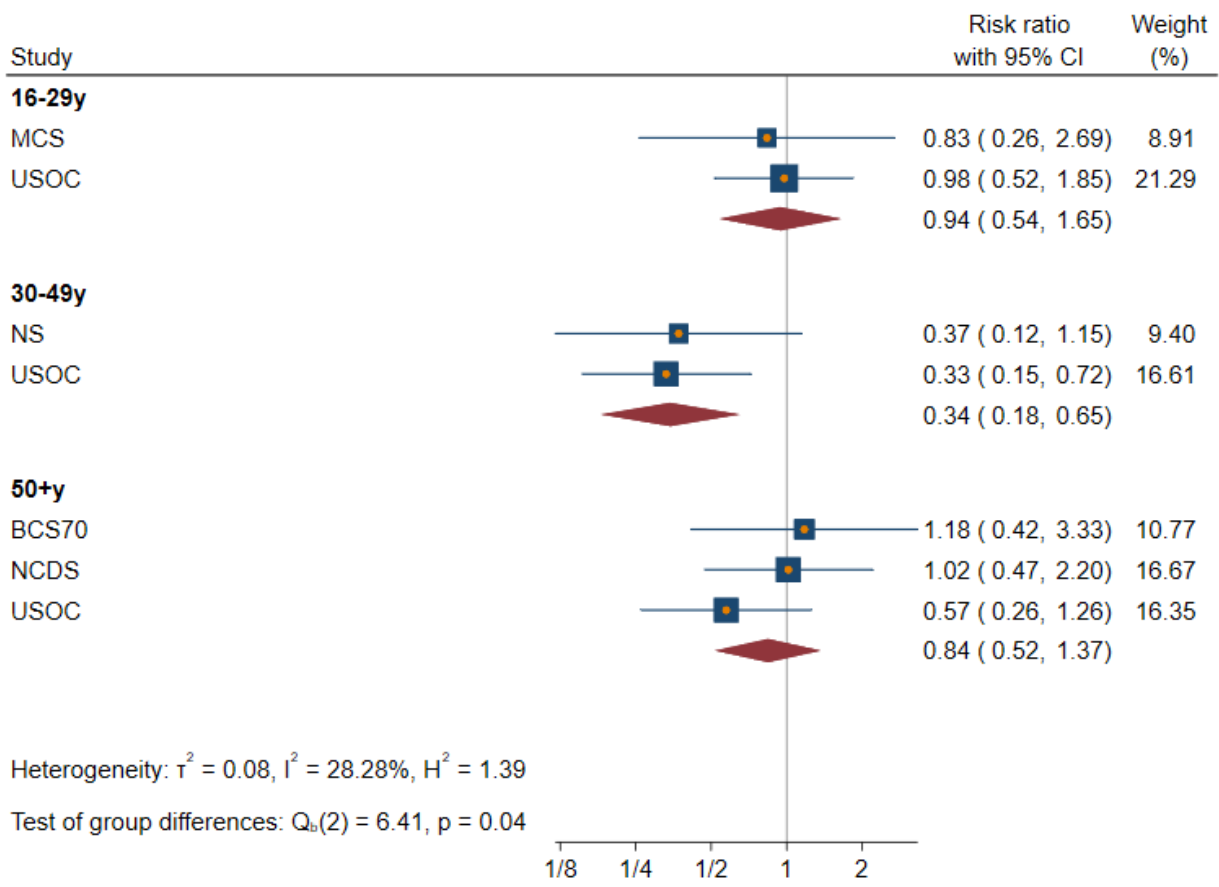

Random-effects REML model

## Figure set 9: Drinks less frequently

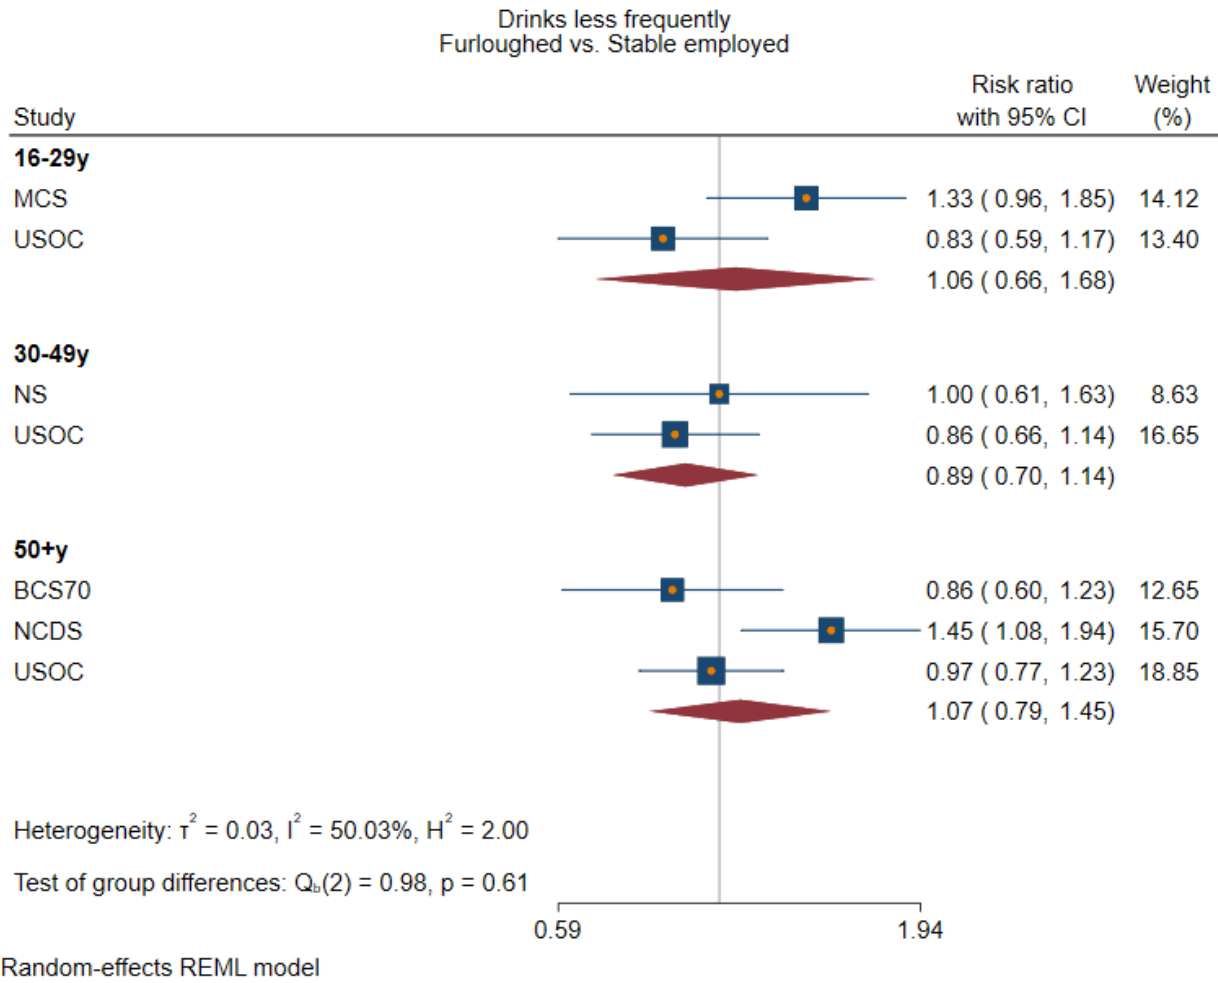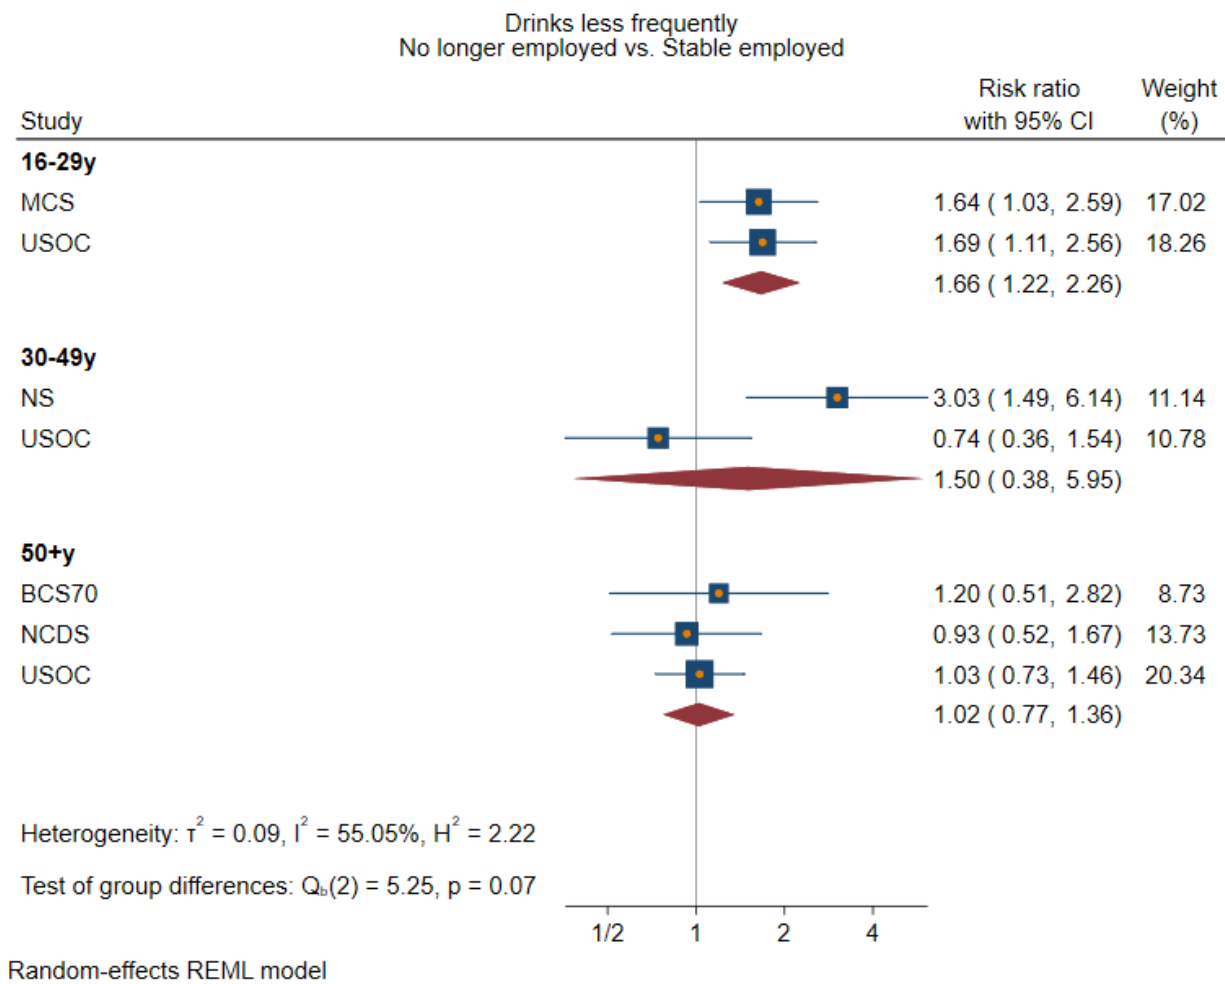

Drinks less frequently  
Stable unemployed vs. Stable employed

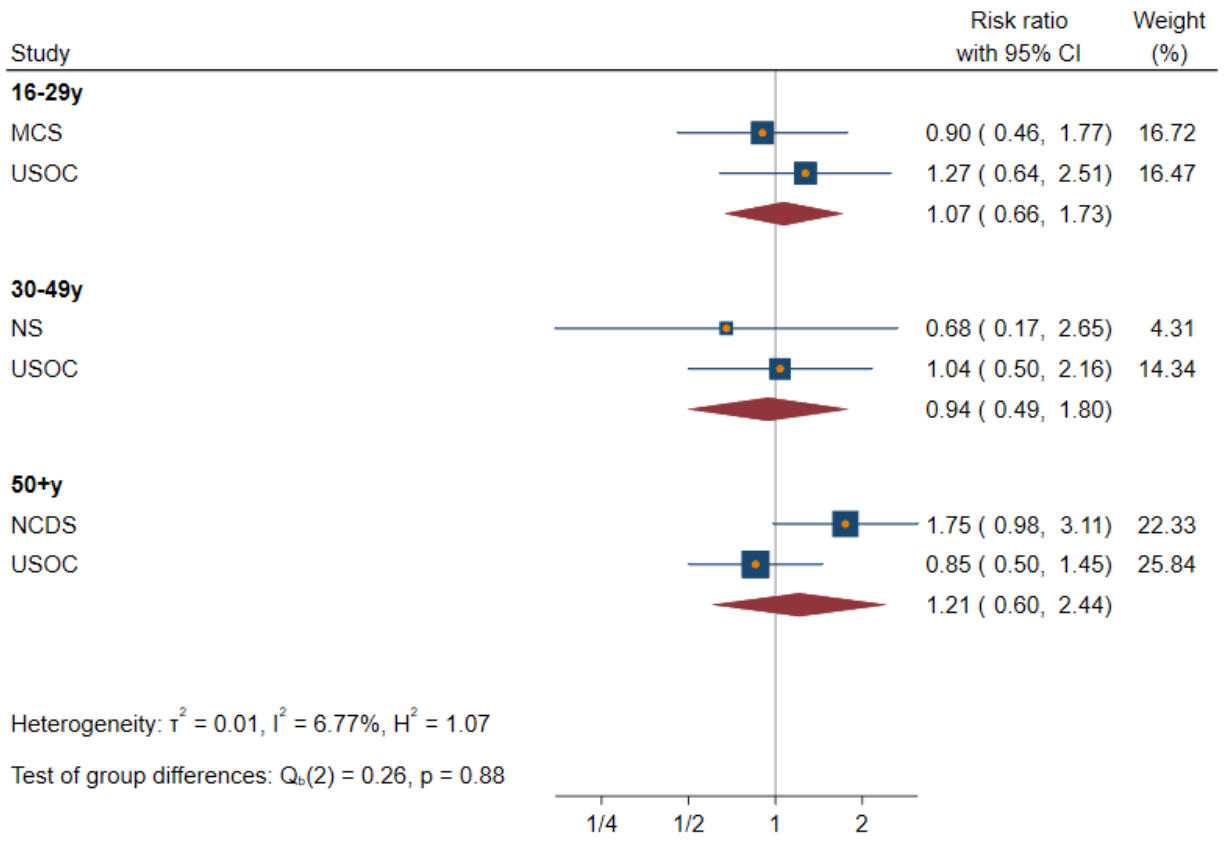

### Figure set 10: Current smoker

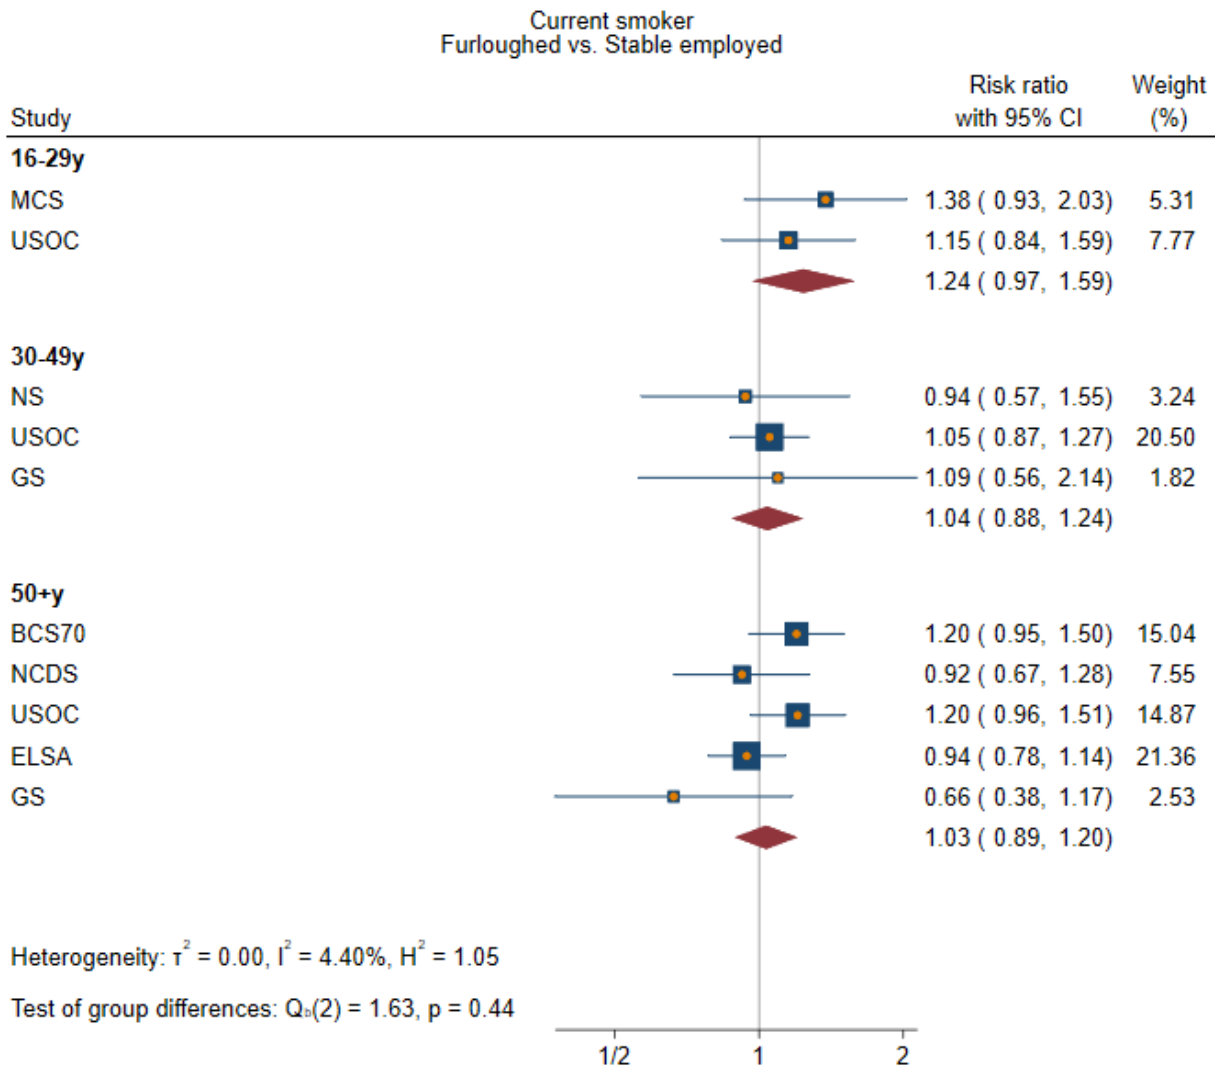

Random-effects REML model

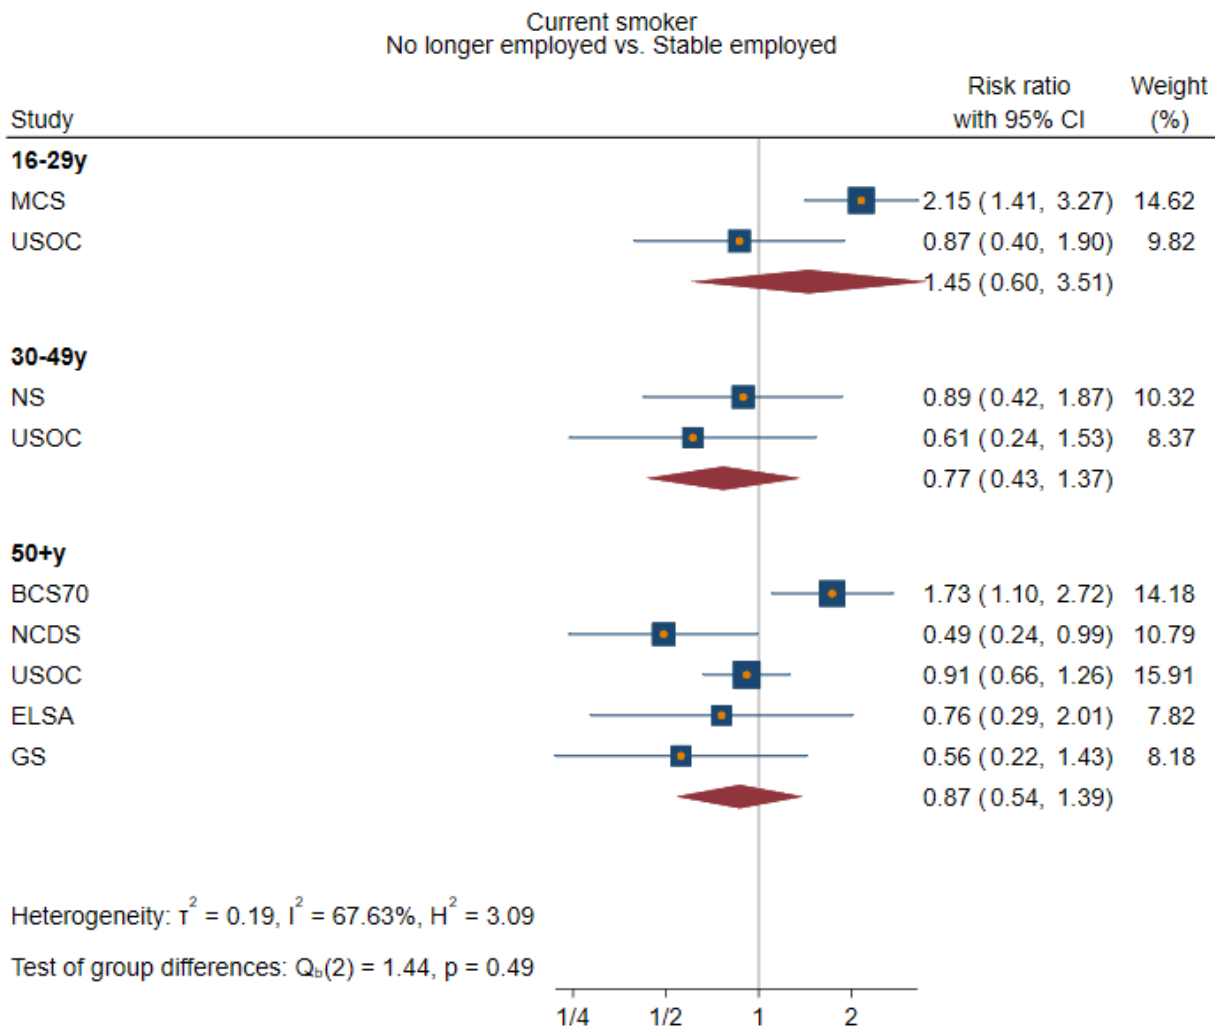

Random-effects REML model

Current smoker  
Stable unemployed vs. Stable employed

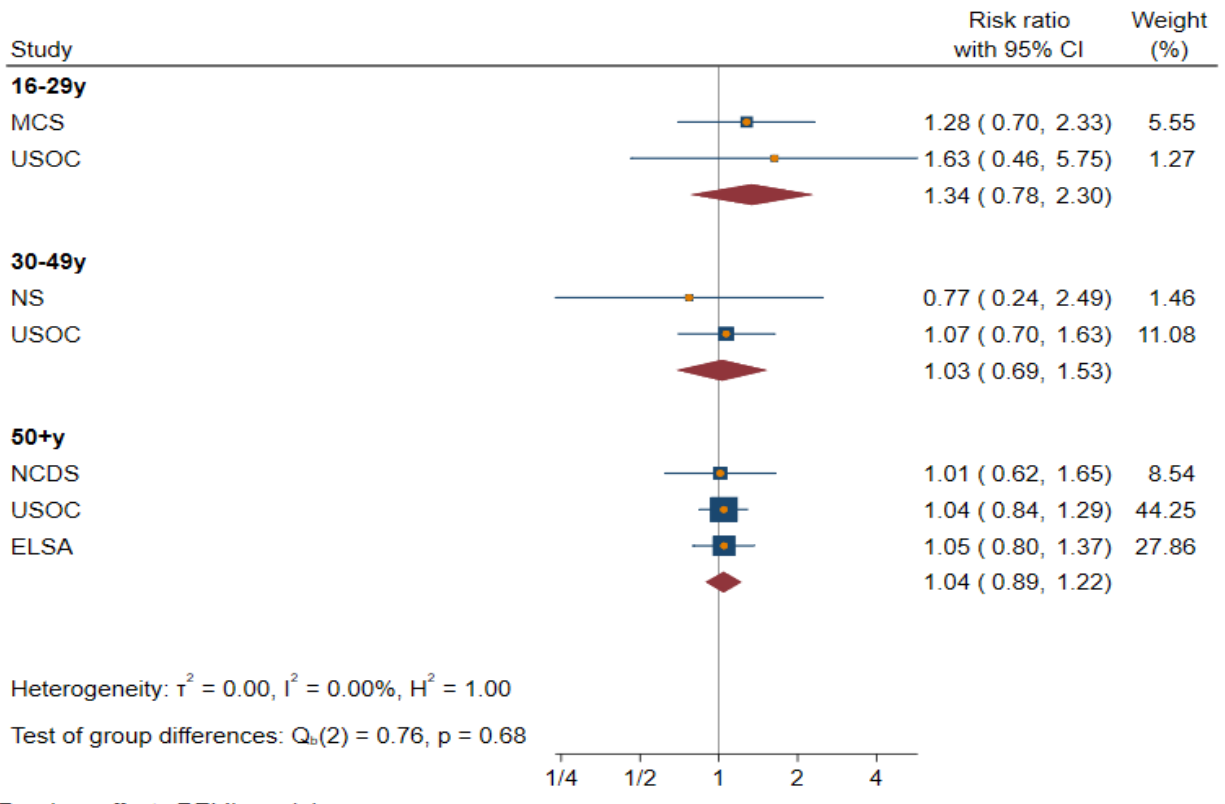

# Figure set 11: Smoking more

Smoking more  
Furloughed vs. Stable employed

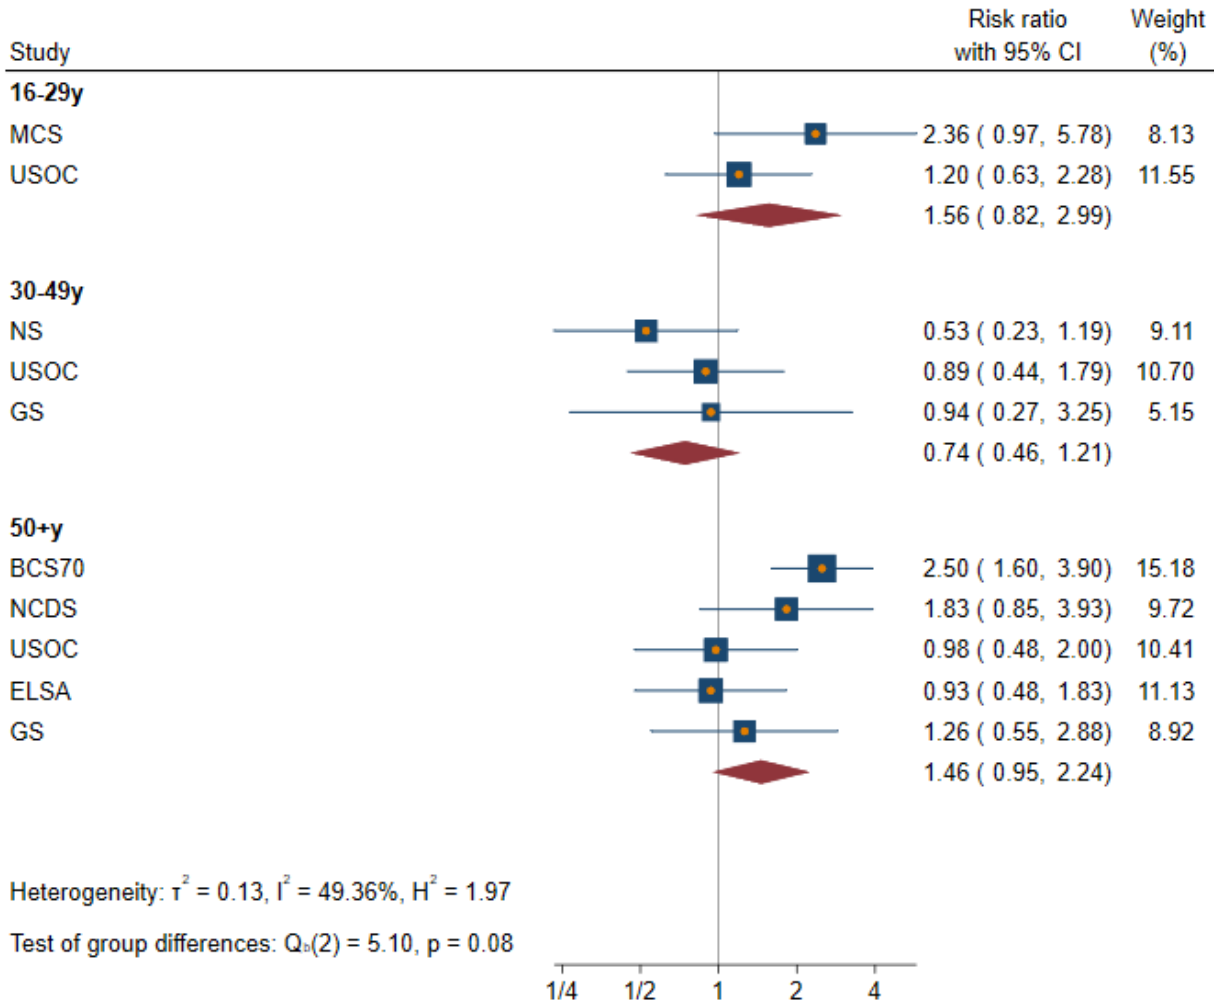

Random-effects REML model

Smoking more  
No longer employed vs. Stable employed

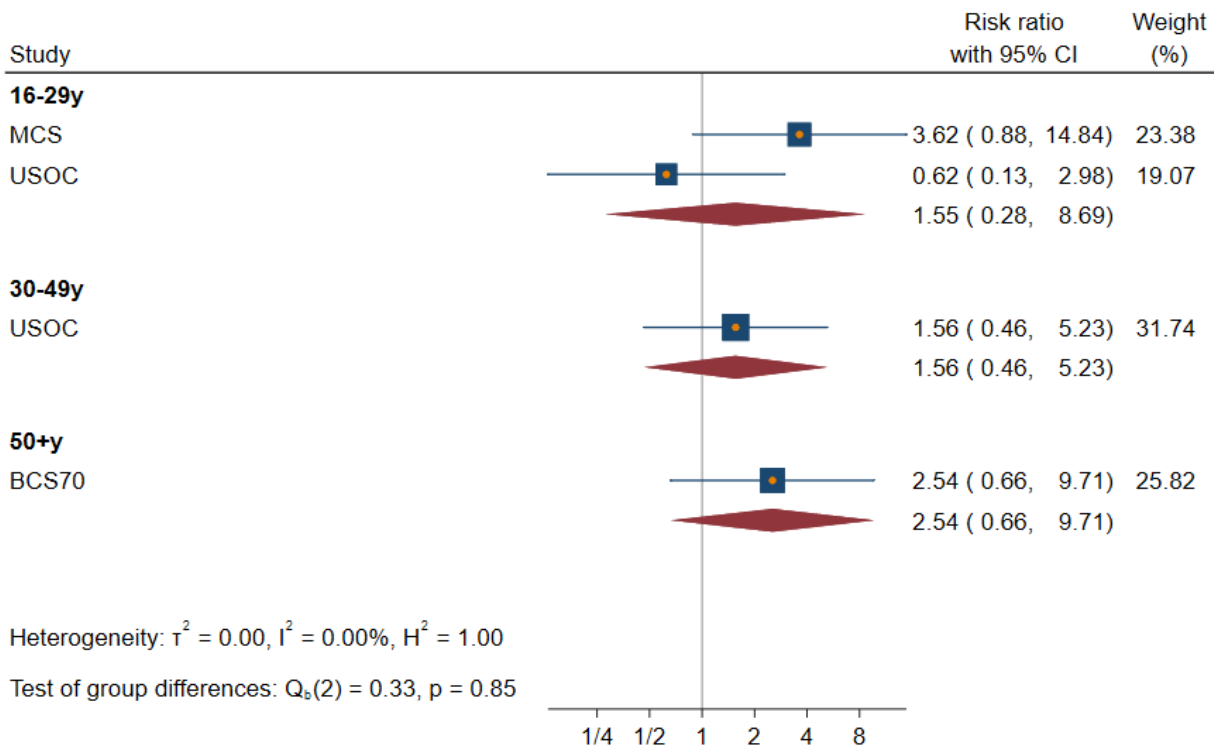

Random-effects REML model

Smoking more  
Stable unemployed vs. Stable employed

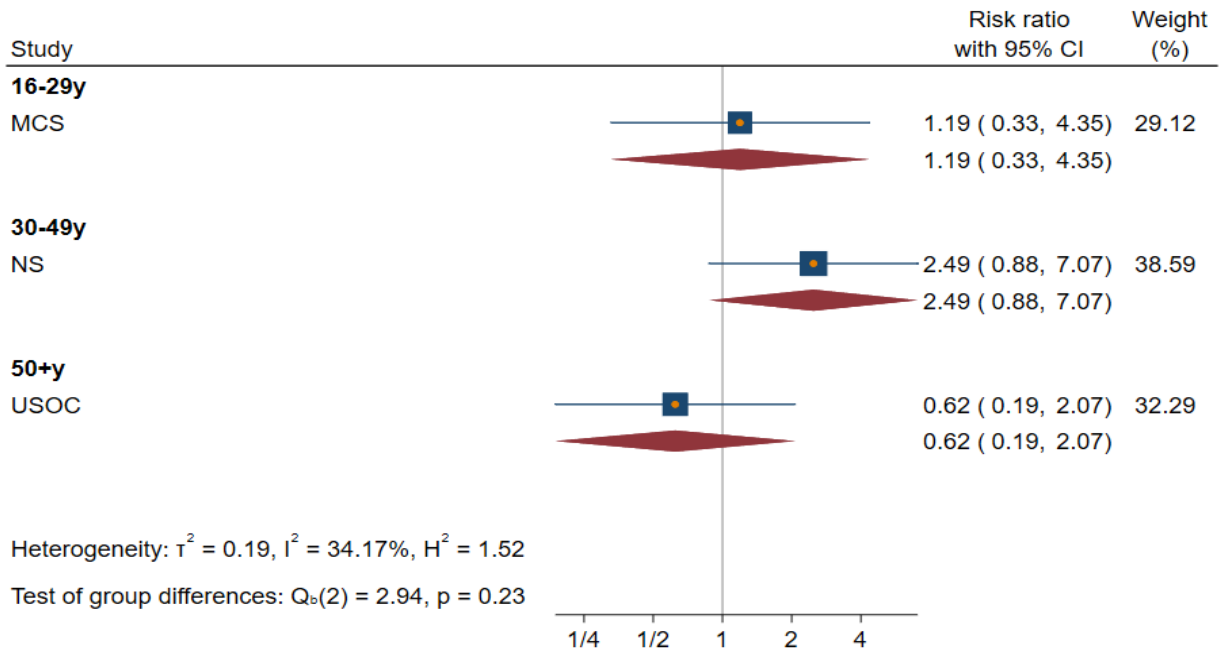

## Figure set 12: Smoking less

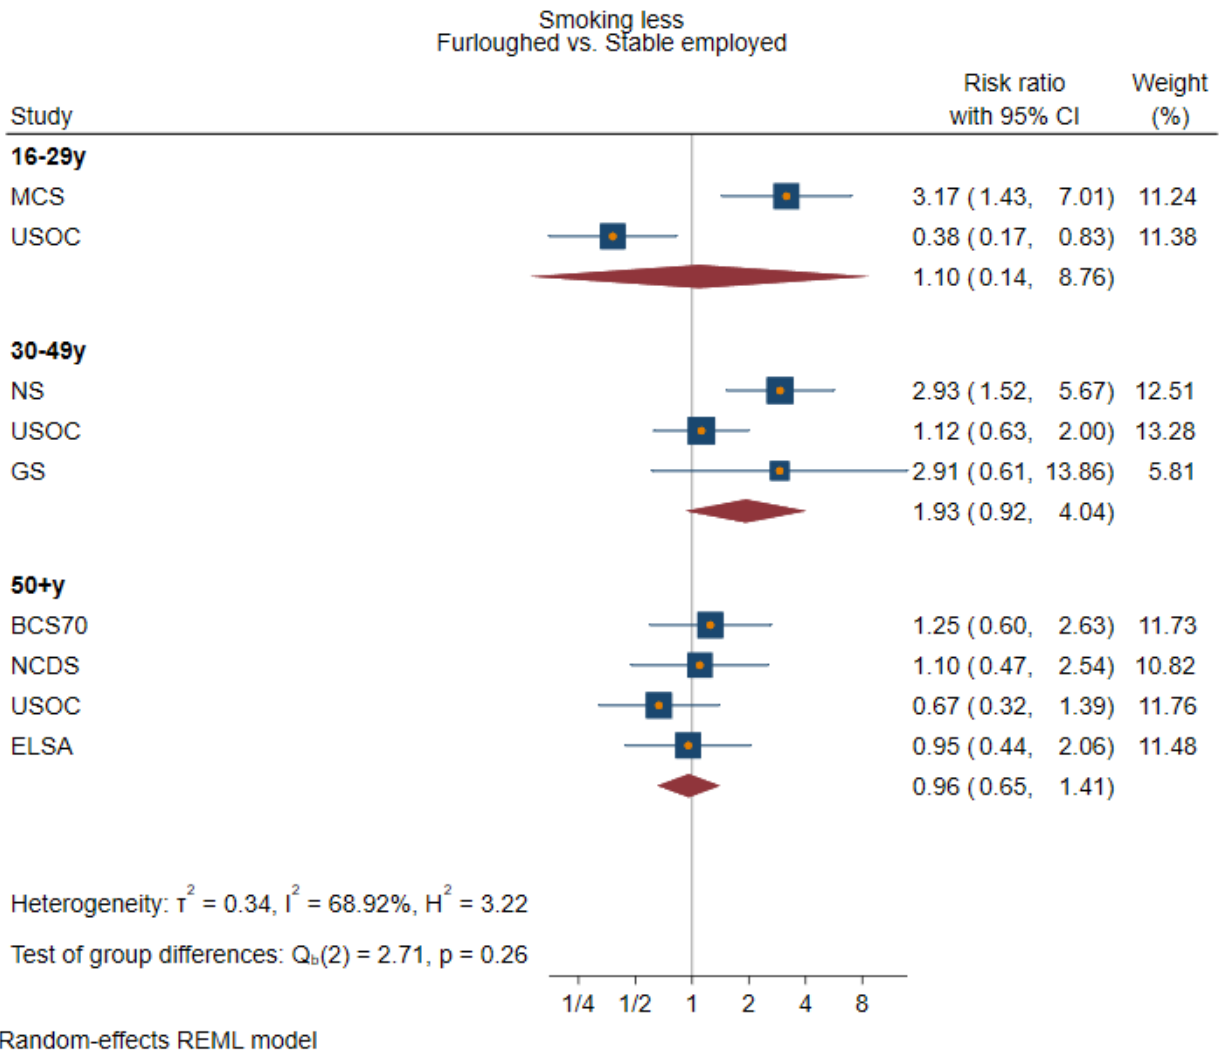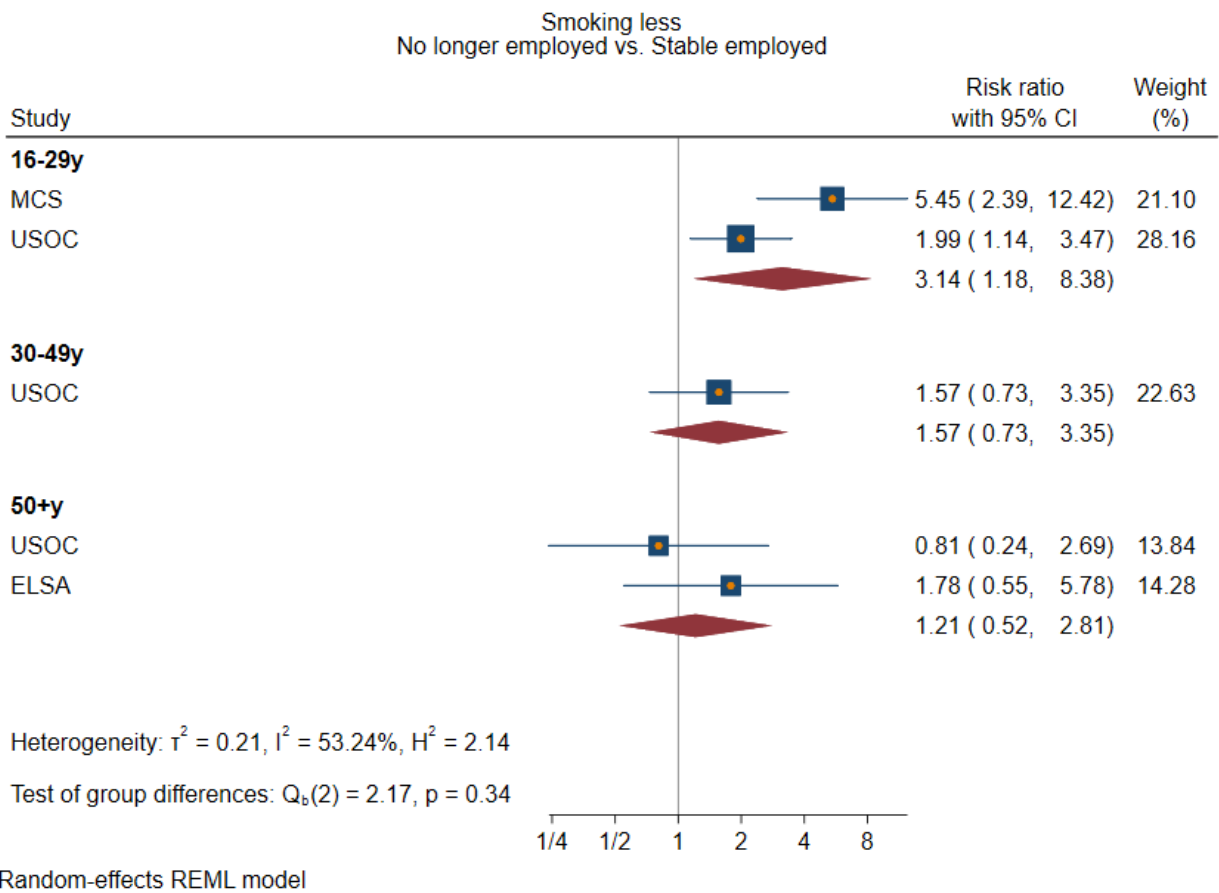



Smoking less  
Stable unemployed vs. Stable employed

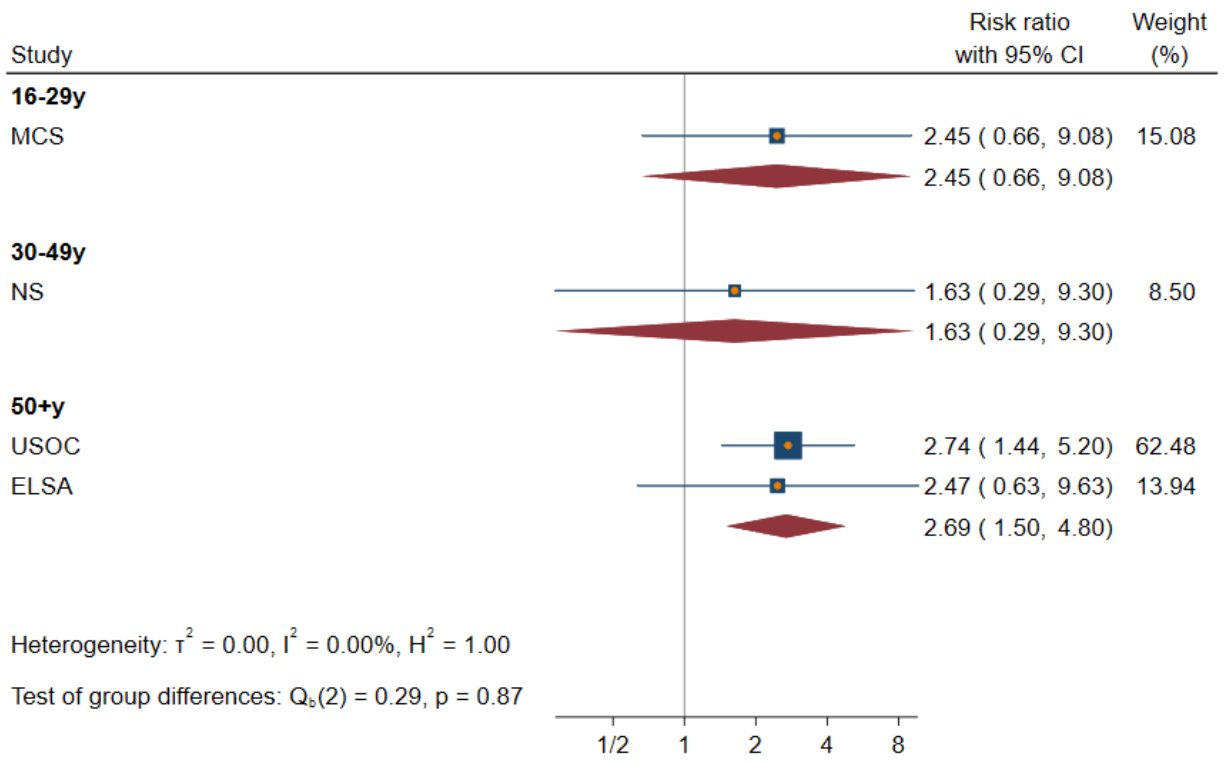

Random-effects REML model

## Figure set 13: Current vaper

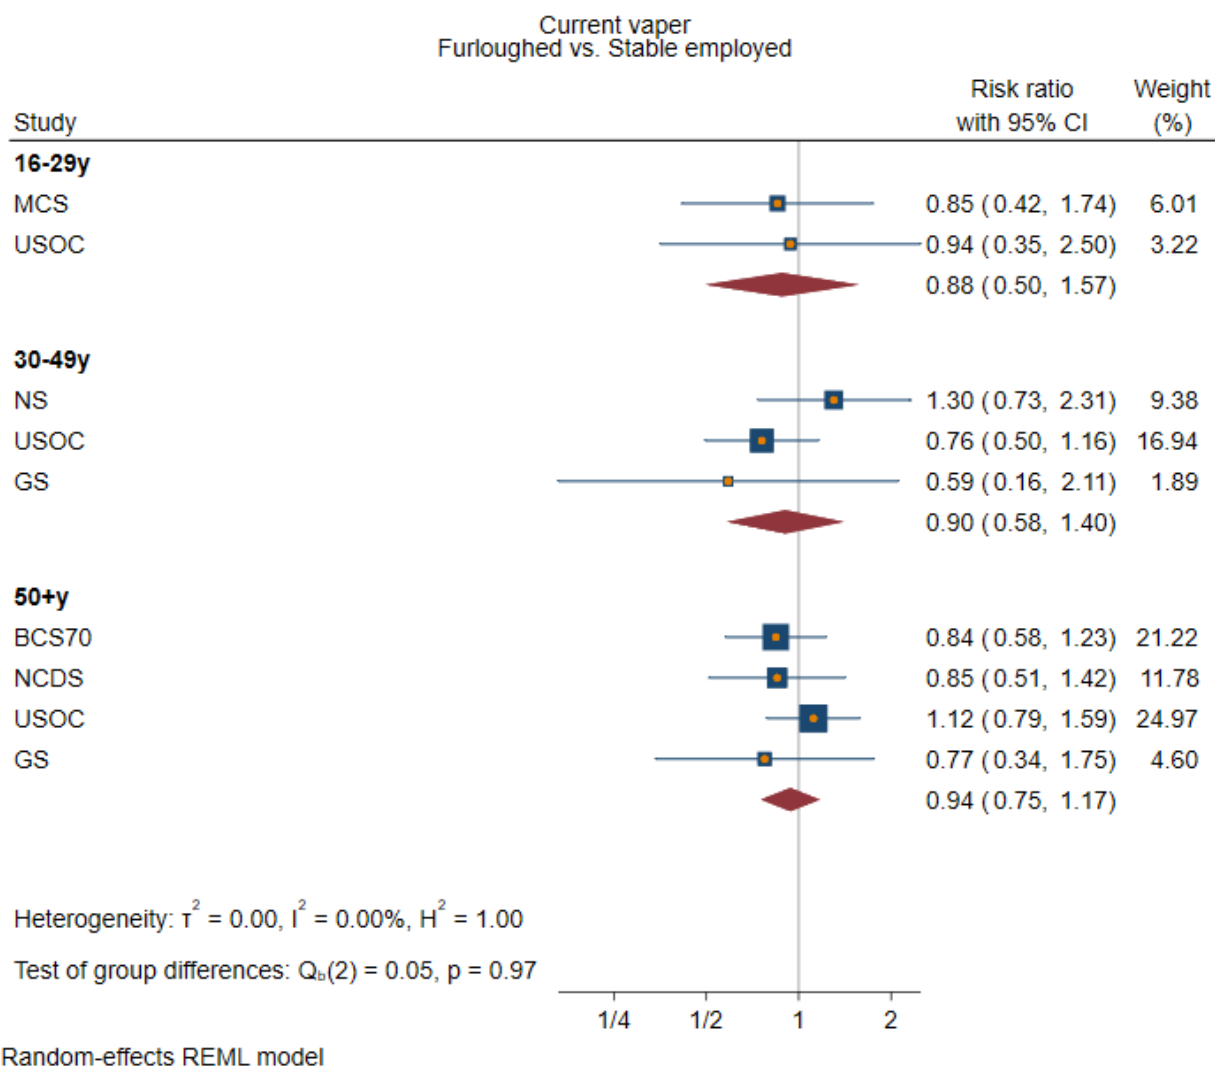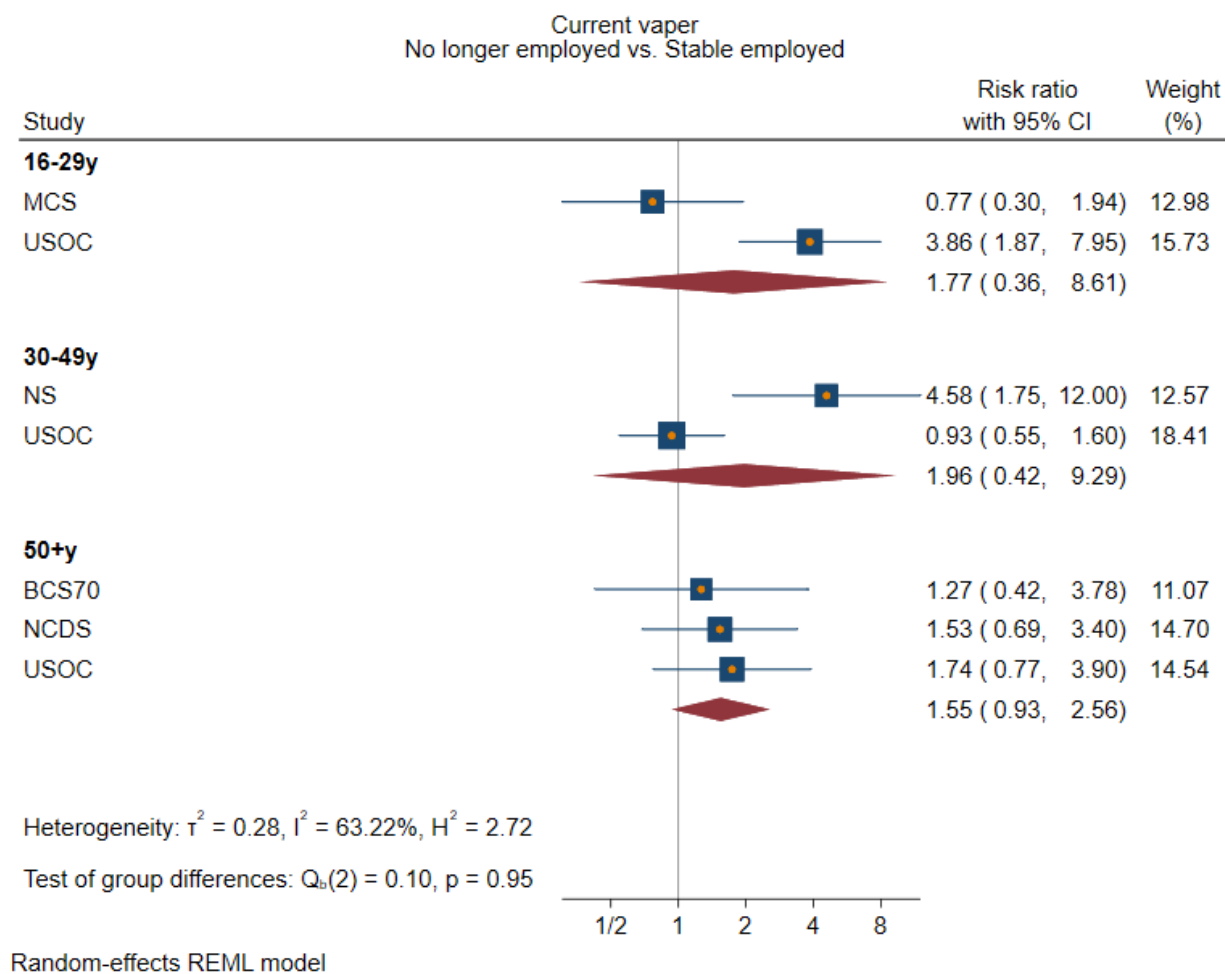

Current vaper  
Stable unemployed vs. Stable employed

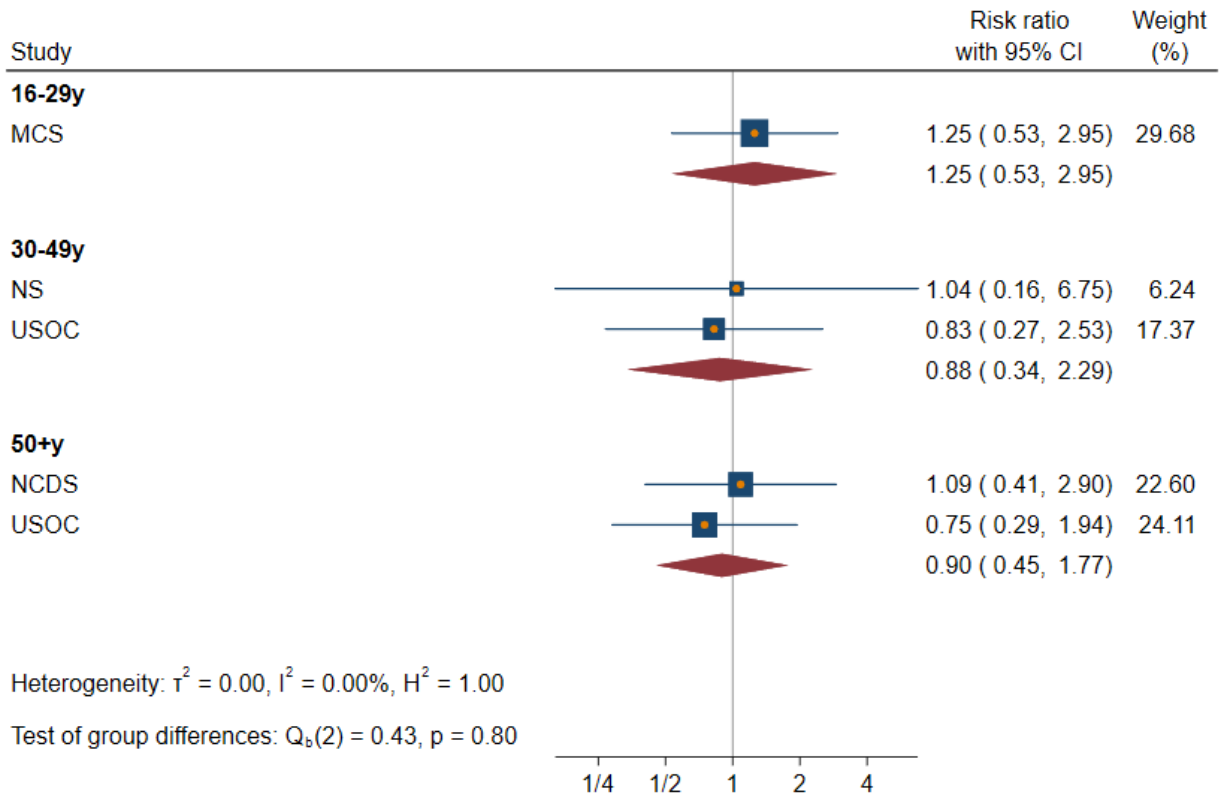

Random-effects REML model

# Figure set 14: Vaping more

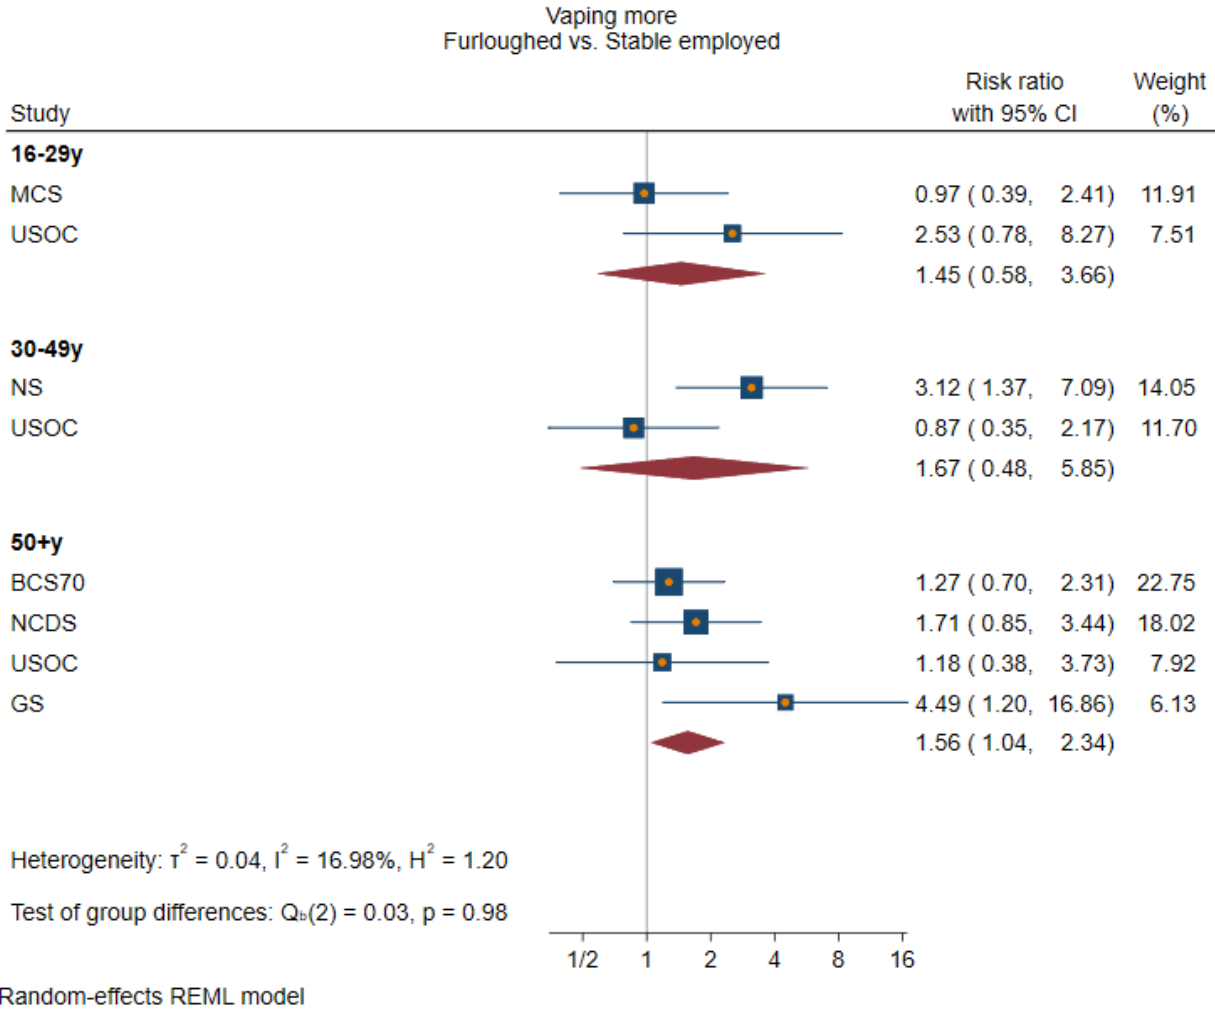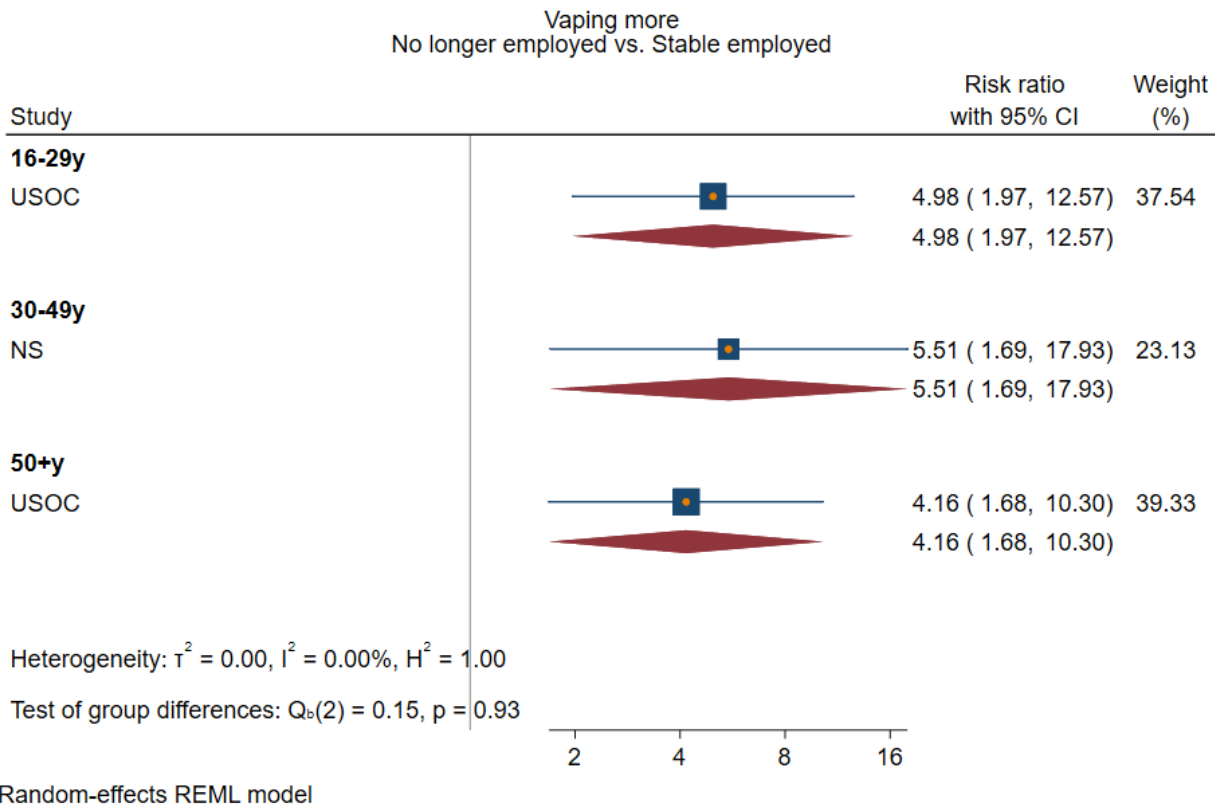

Vaping more  
Stable unemployed vs. Stable employed

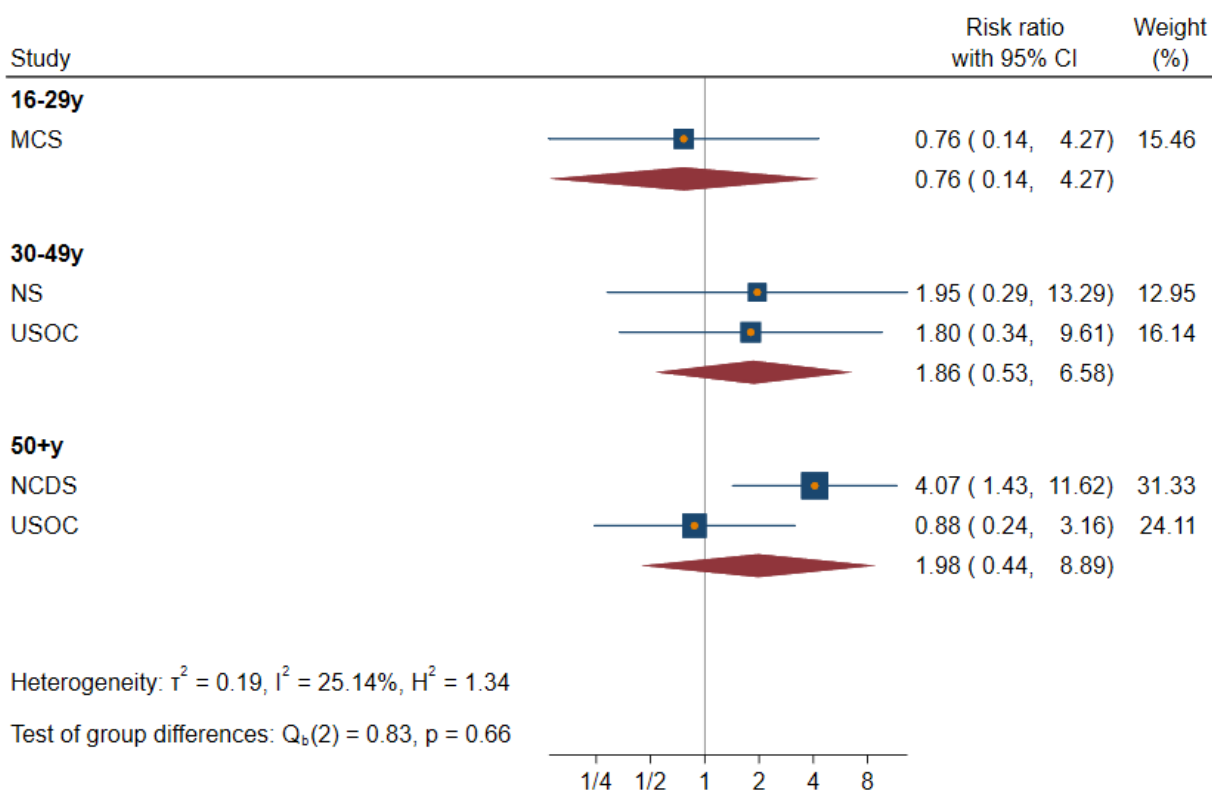

Random-effects REML model

## Figure set 15: Vaping less

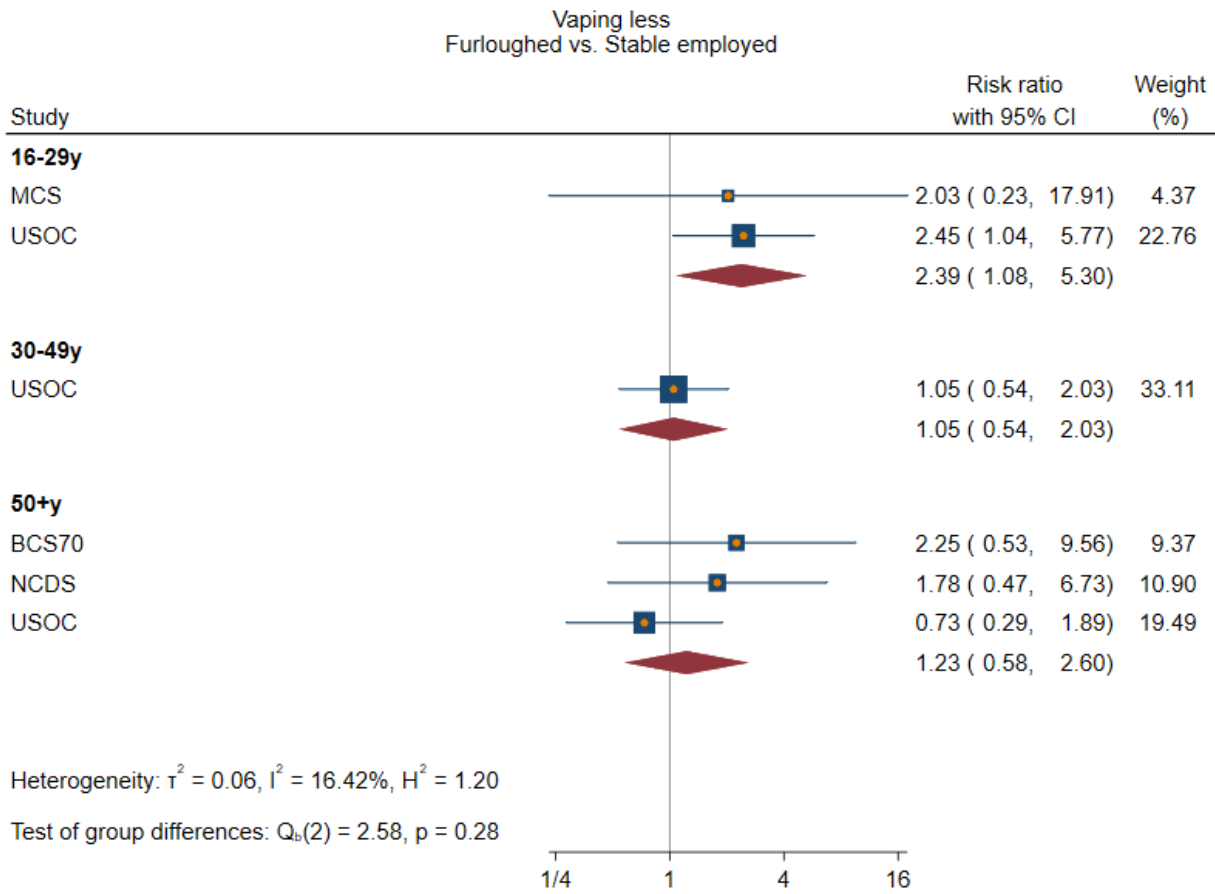

Random-effects REML model

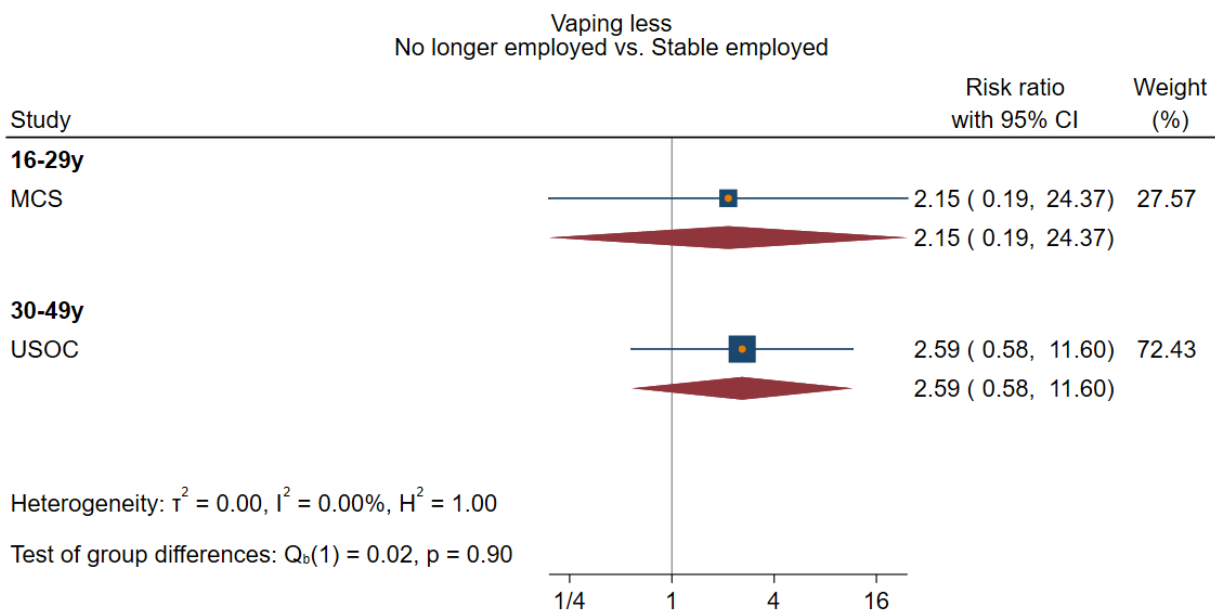

Random-effects REML model

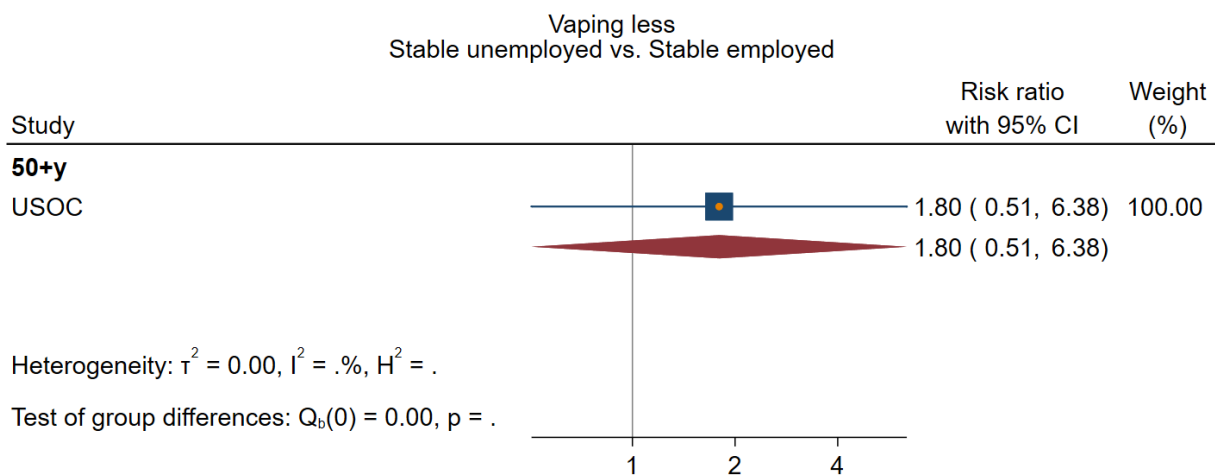

Random-effects REML model



# Figure set 16: Currently drinks 4+ days/week or 5+ drinks/occasion

Currently drinks 4+days/week or 5+ drinks/occasion)  
Furloughed vs. Stable employed

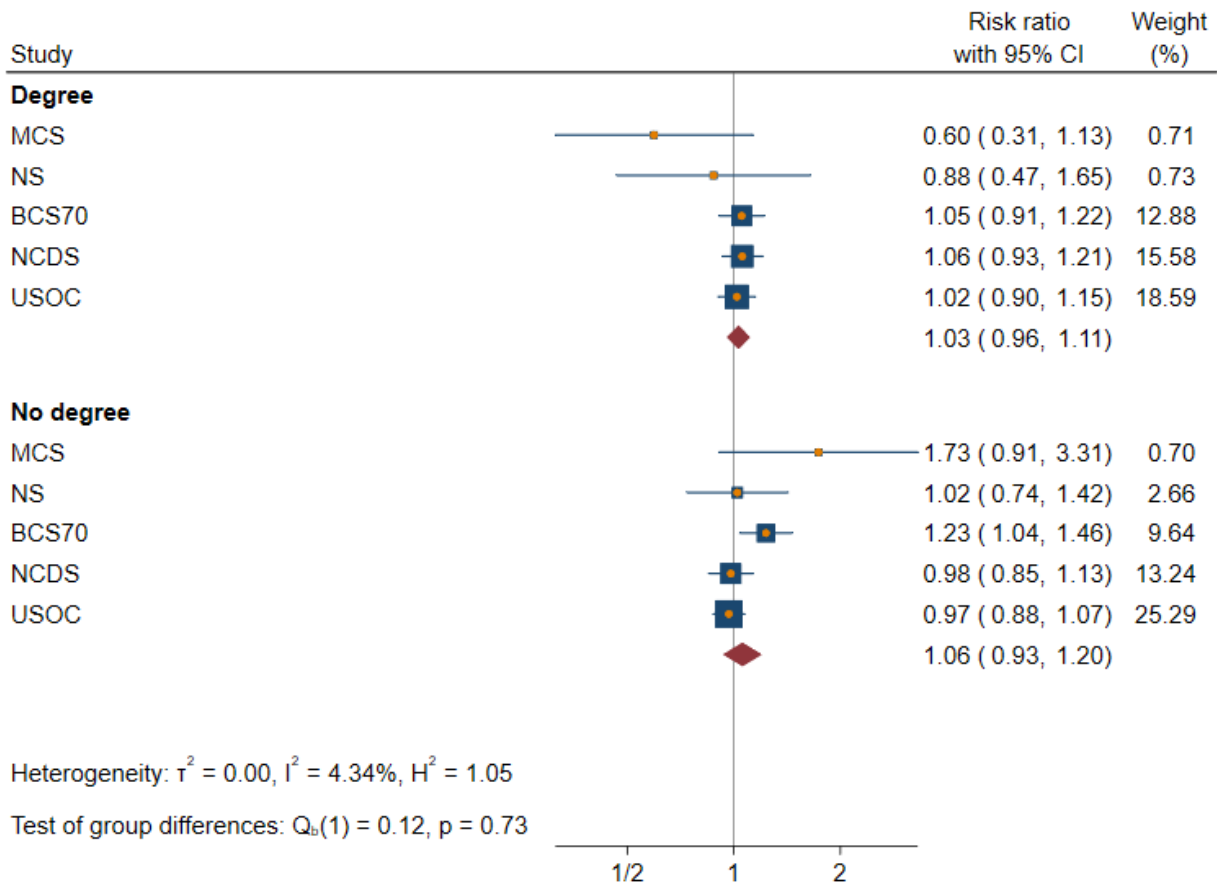

Random-effects REML model

Currently drinks 4+days/week or 5+ drinks/occasion)  
No longer employed vs. Stable employed

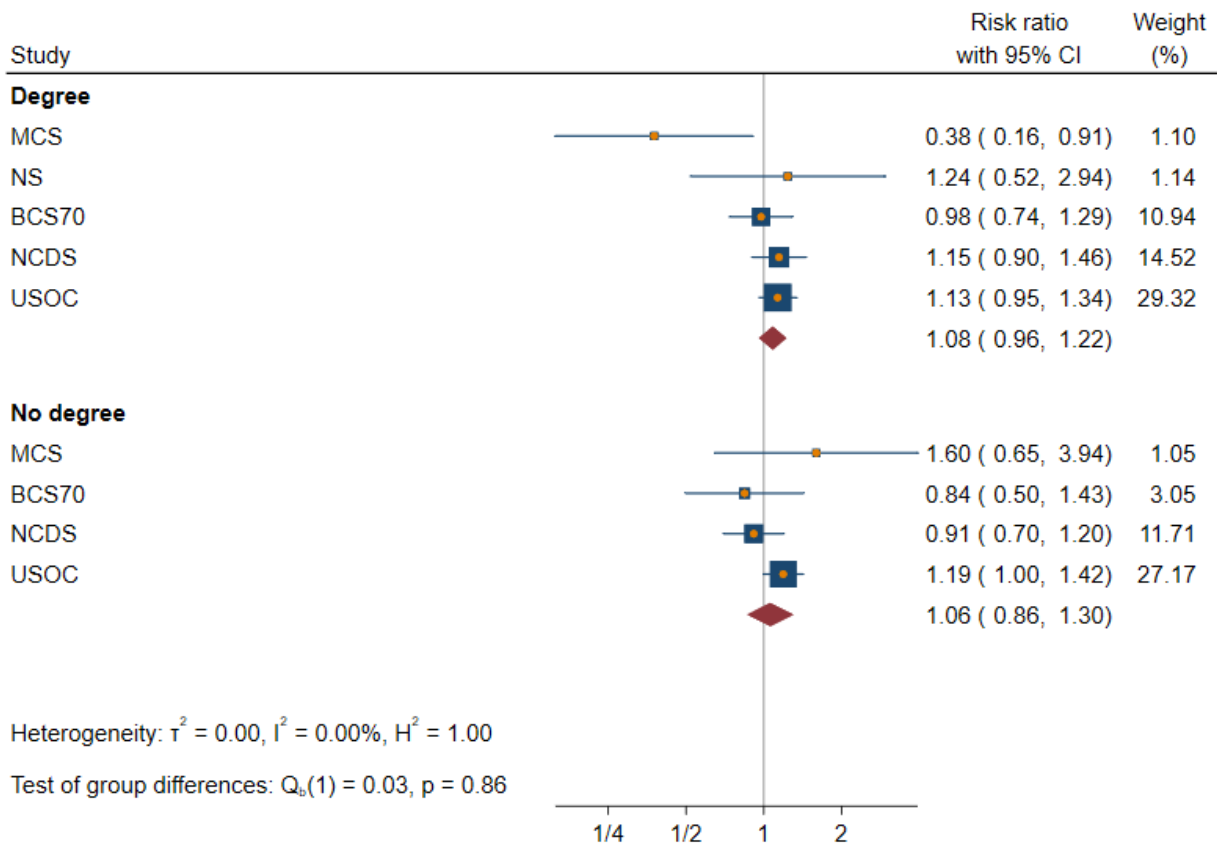

Random-effects REML model



Currently drinks 4+days/week or 5+ drinks/occasion)  
Stable unemployed vs. Stable employed

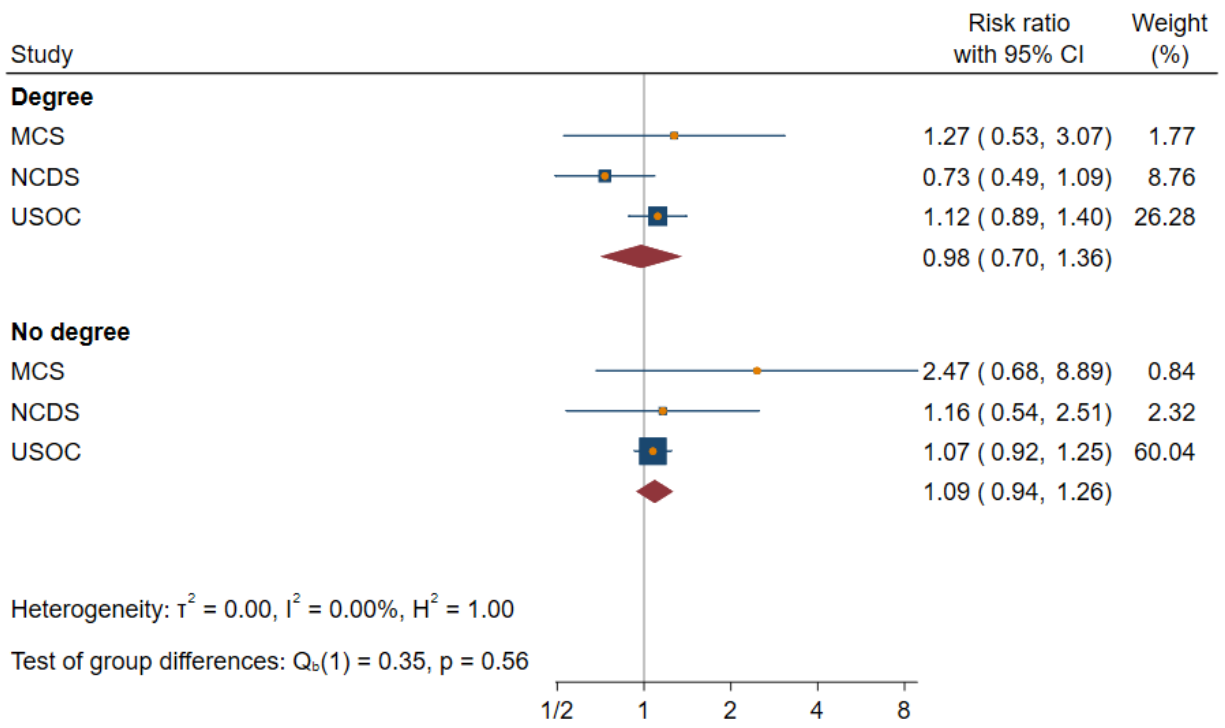

Random-effects REML model



## Figure set 17: Increased alcohol consumption

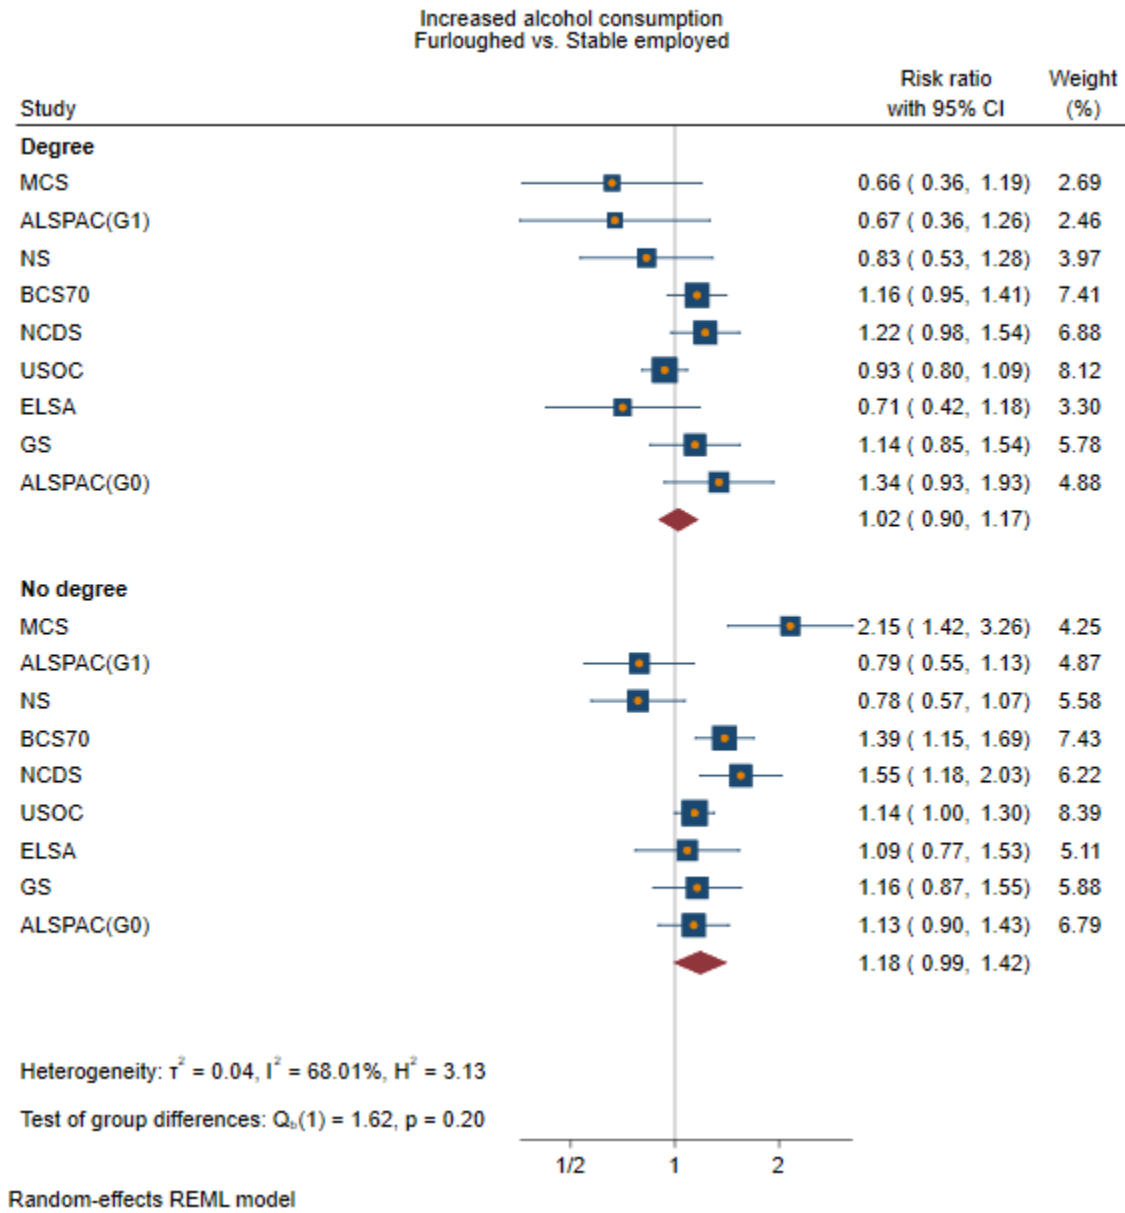

Increased alcohol consumption  
No longer employed vs. Stable employed

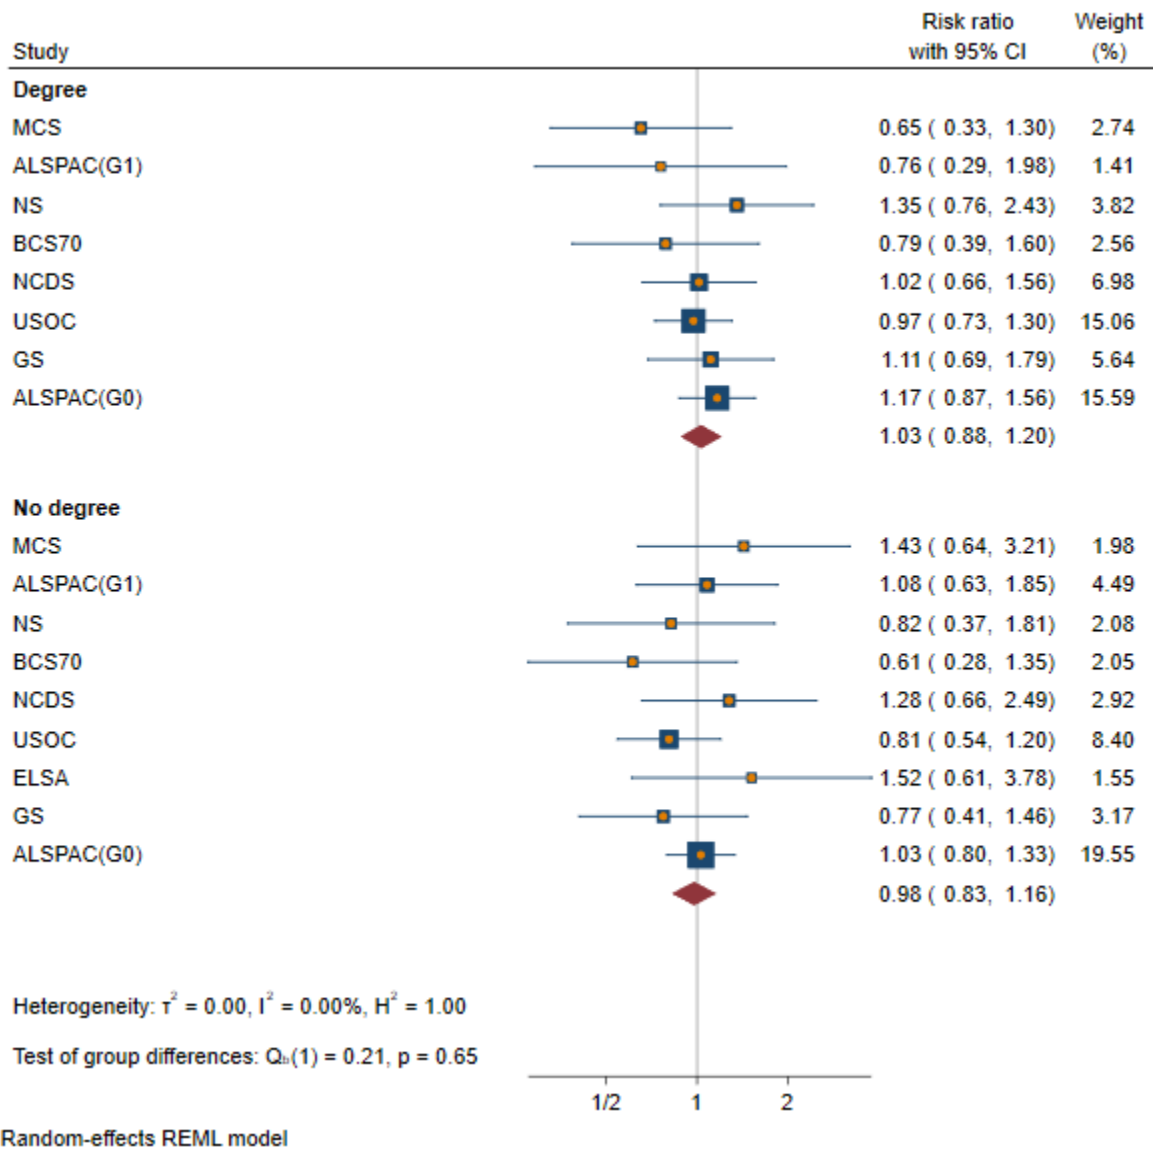

Increased alcohol consumption  
Stable unemployed vs. Stable employed

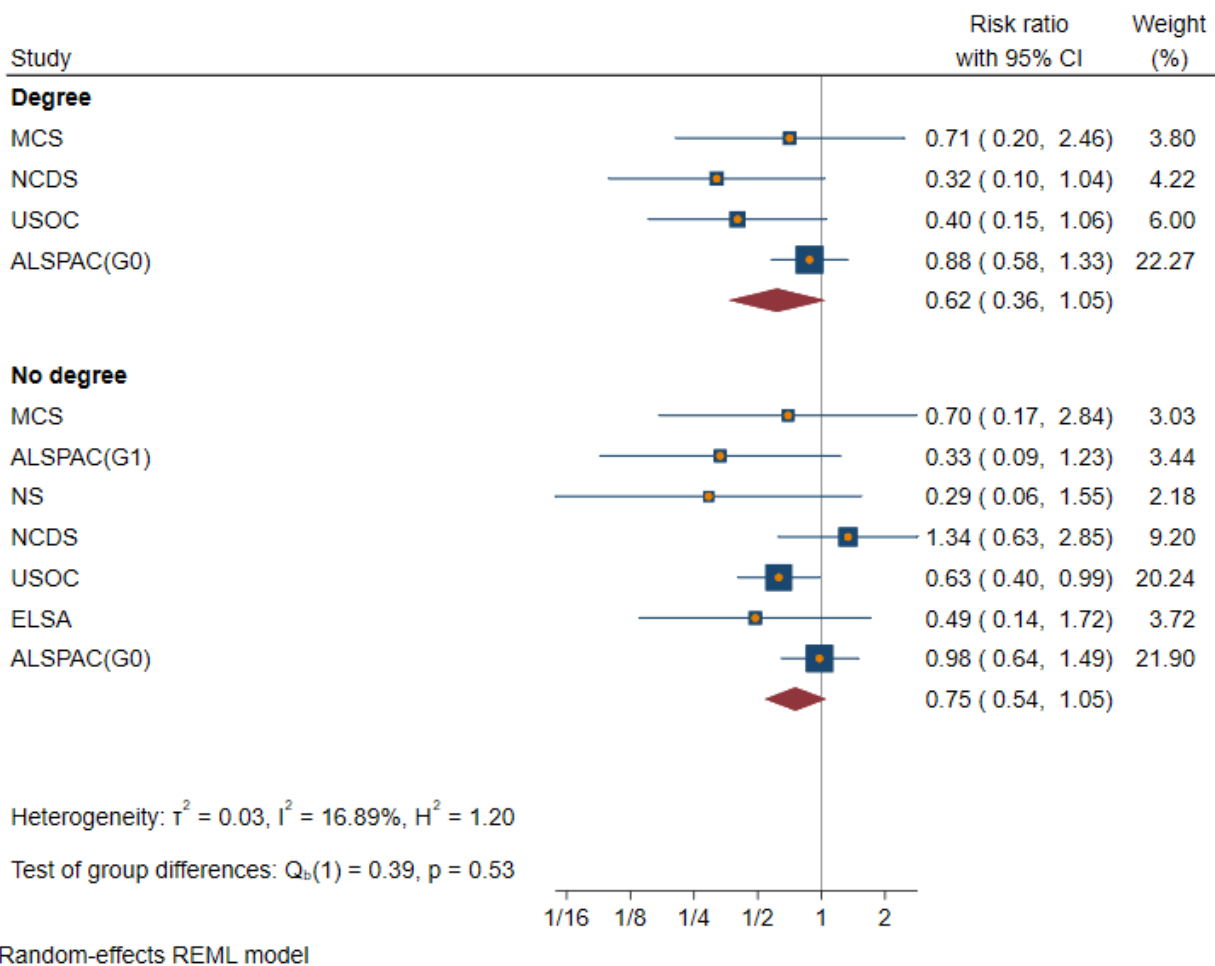

## Figure set 18: Reduced alcohol consumption

Reduced alcohol consumption  
Furloughed vs. Stable employed

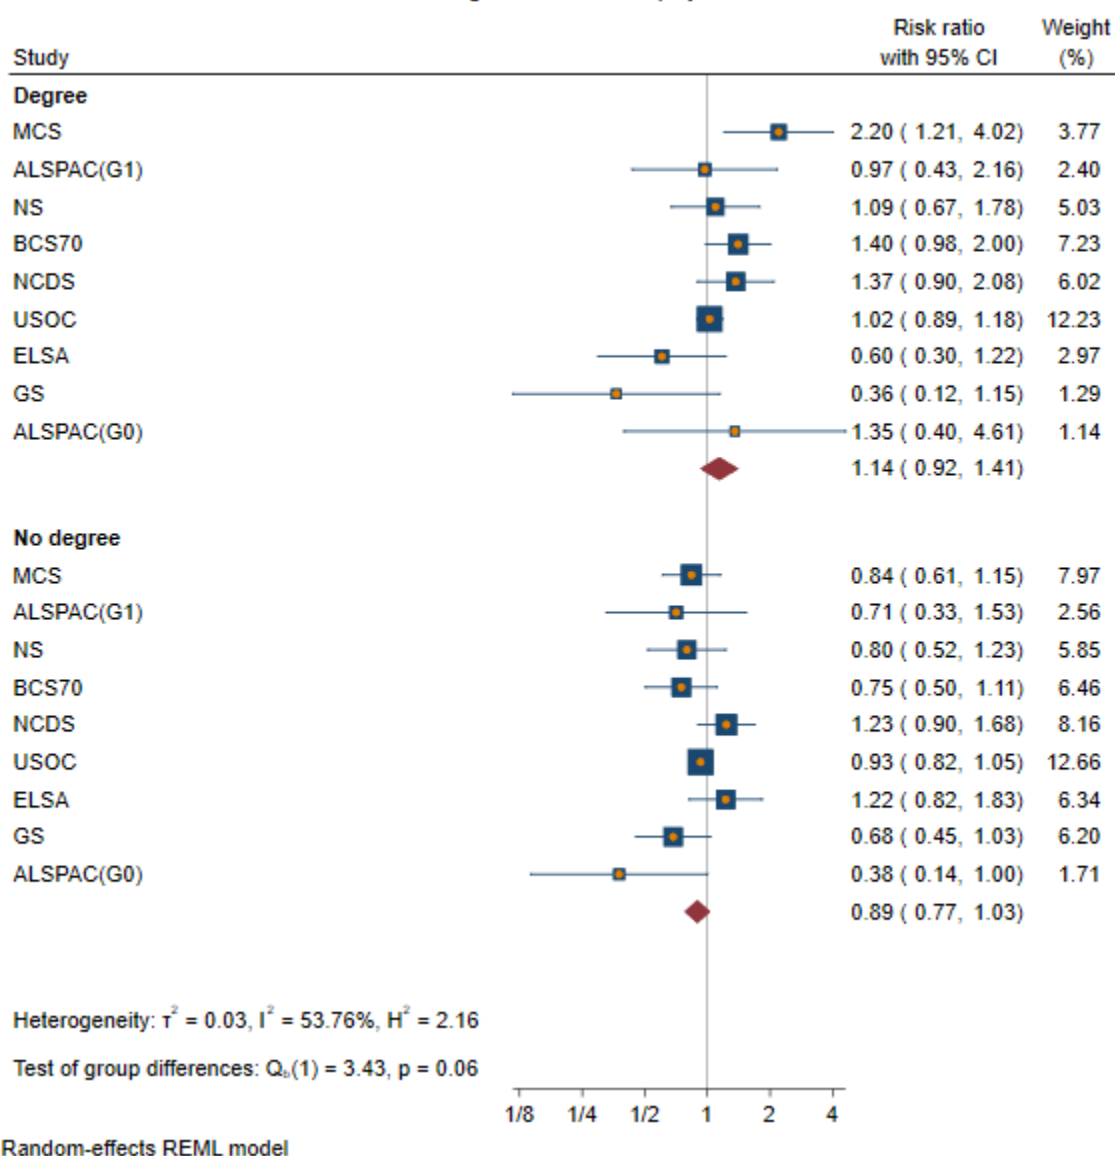

Reduced alcohol consumption  
No longer employed vs. Stable employed

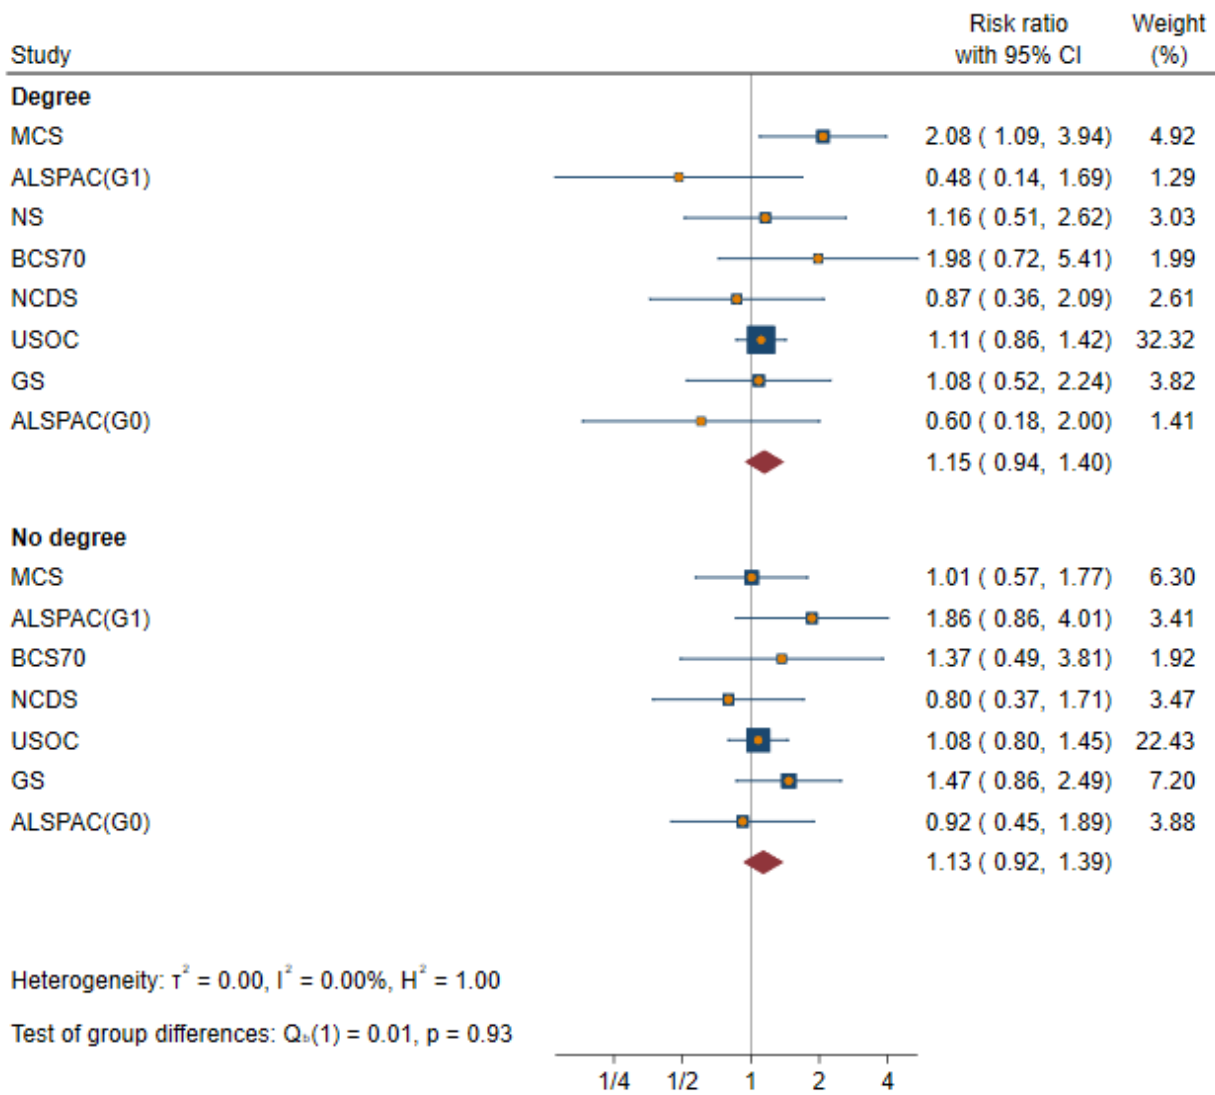

Random-effects REML model

Reduced alcohol consumption  
Stable unemployed vs. Stable employed

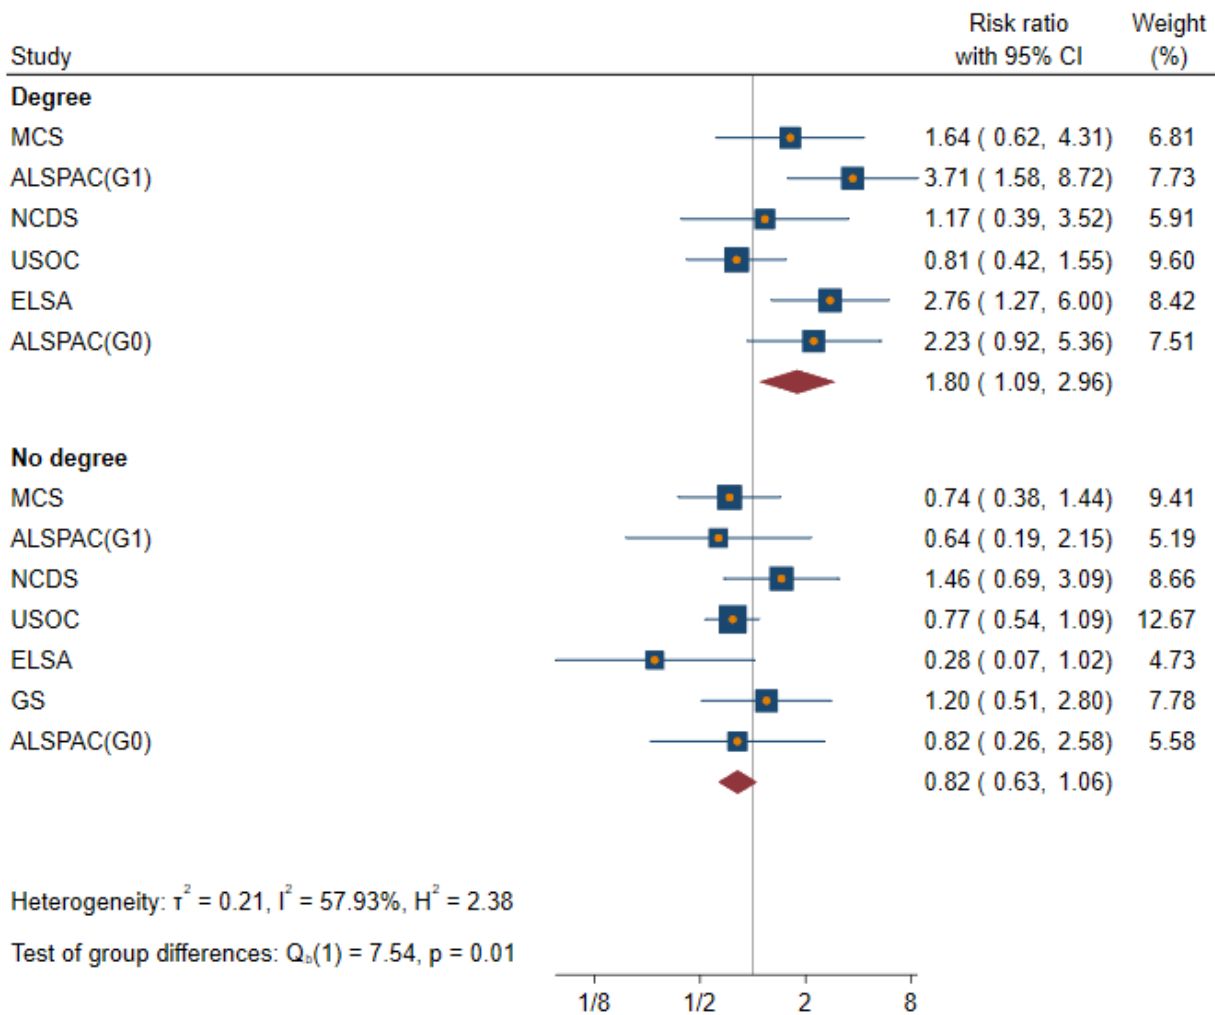

Random-effects REML model

## Figure set 19: Currently drinks 5+ drinks/occasions

Currently drinks 5+ drinks/occasion  
Furloughed vs. Stable employed

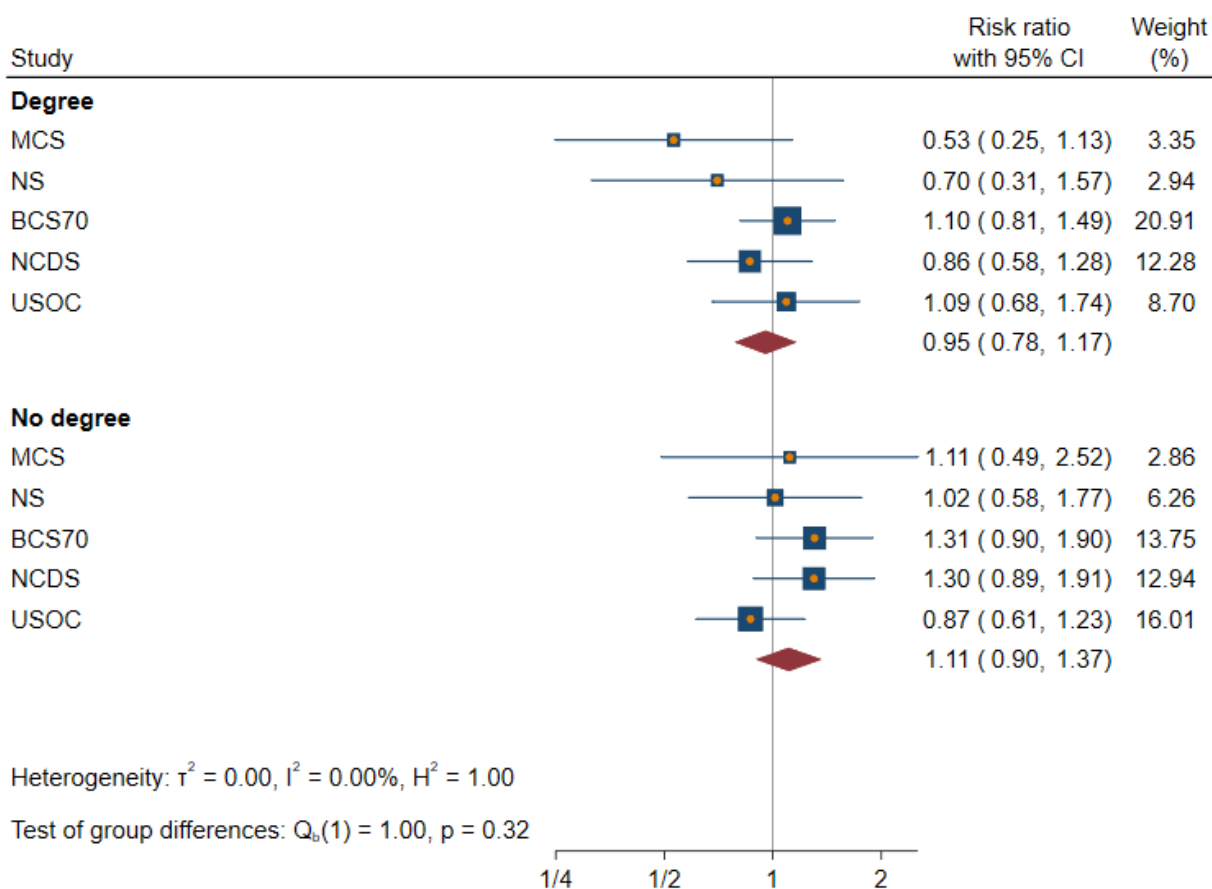

Currently drinks 5+ drinks/occasion  
No longer employed vs. Stable employed

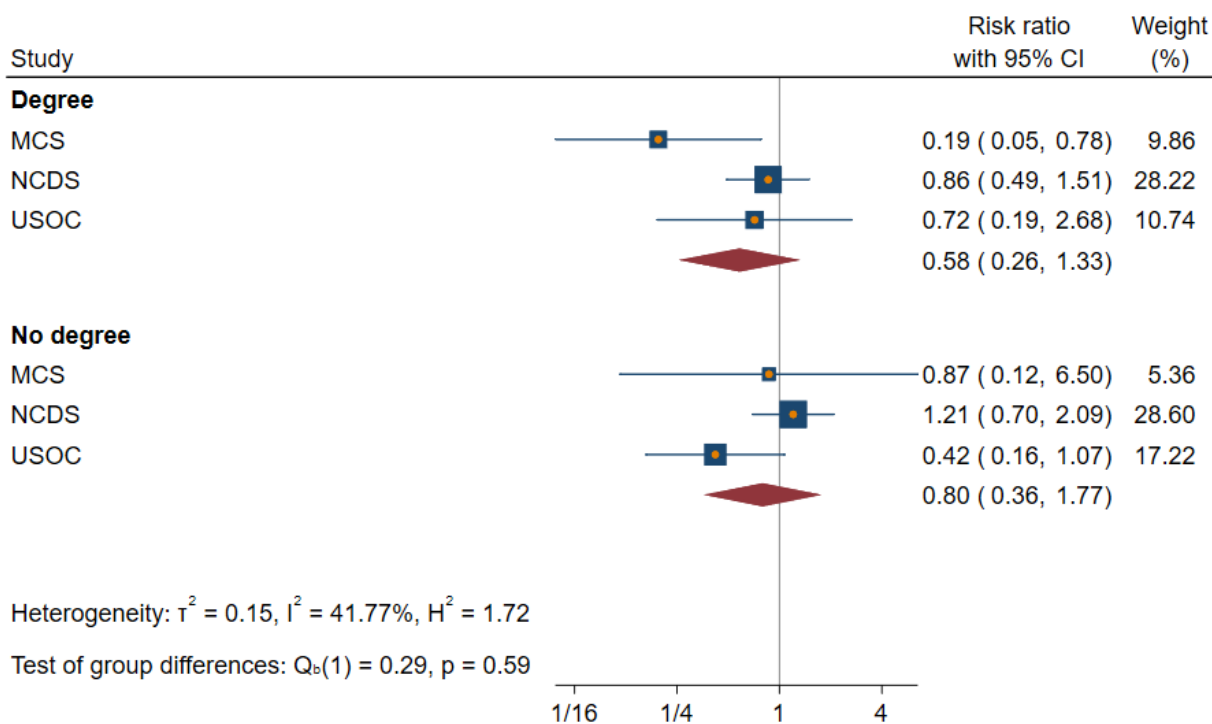

Currently drinks 5+ drinks/occasion  
Stable unemployed vs. Stable employed

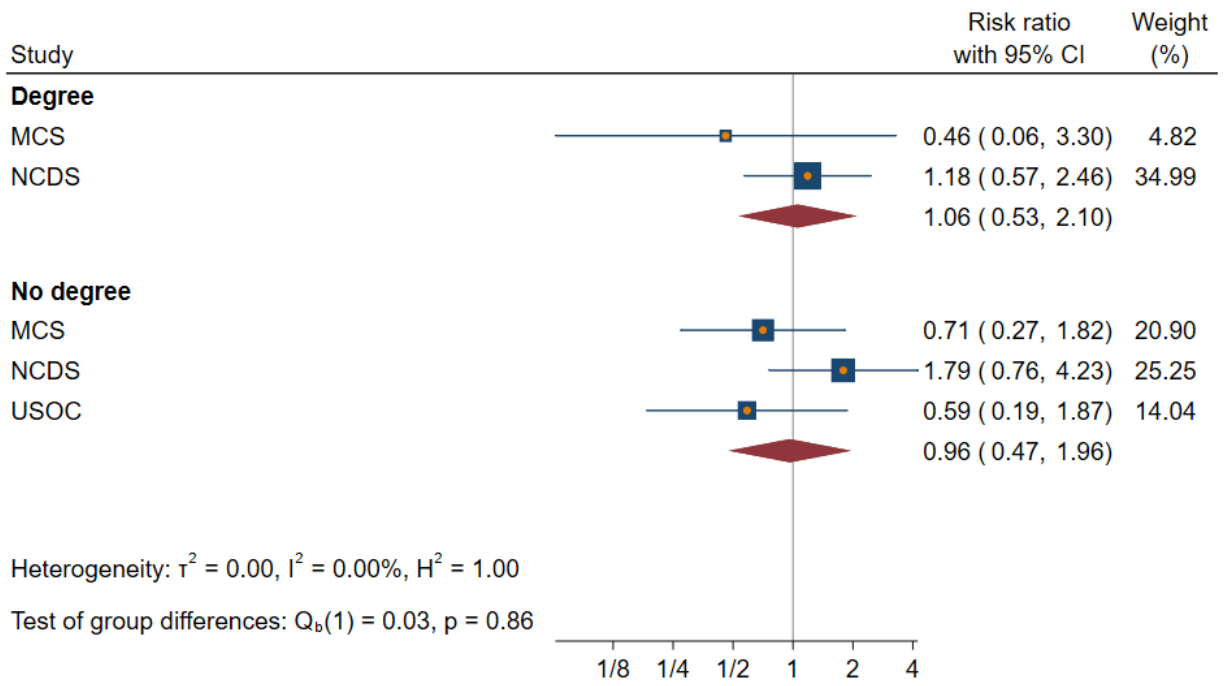



## Figure set 20: Drinks more alcohol units per occasions

Drinks more alcohol units per occasion  
Furloughed vs. Stable employed

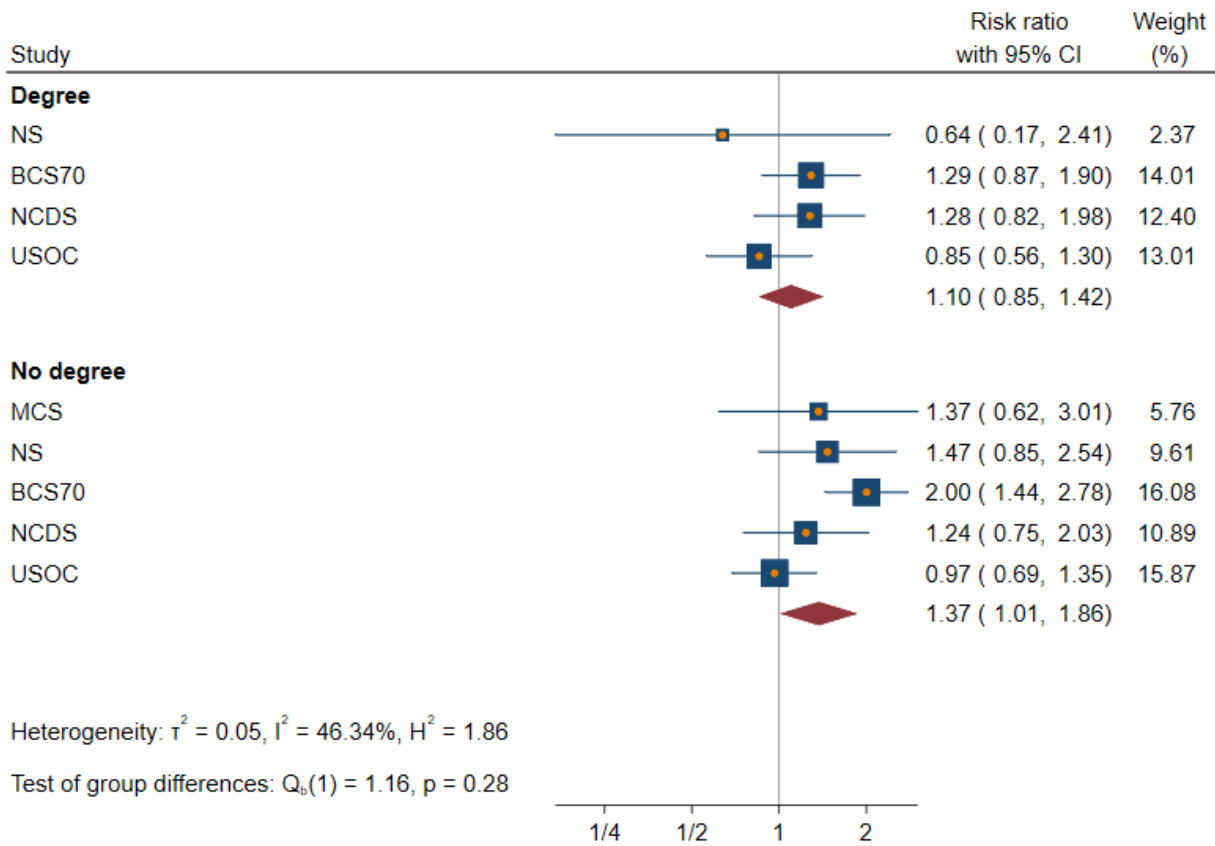

Random-effects REML model

Drinks more alcohol units per occasion  
No longer employed vs. Stable employed

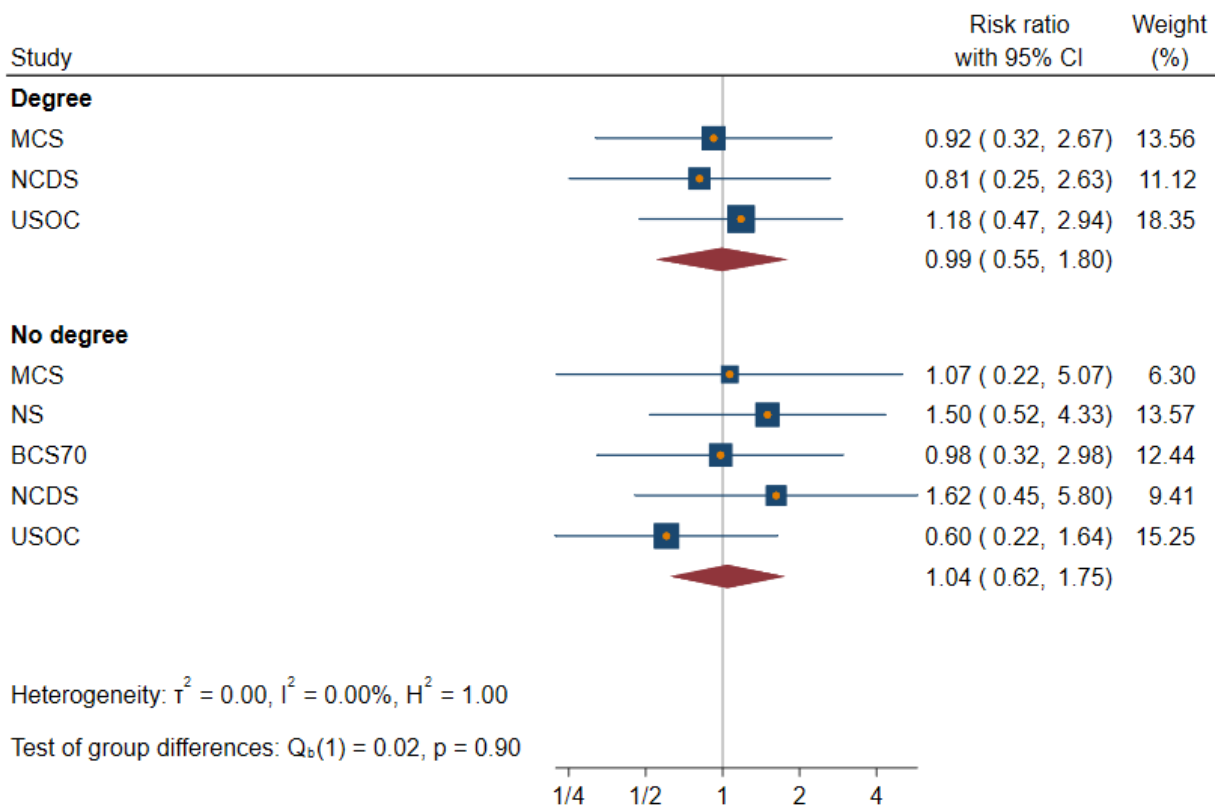

Random-effects REML model

Drinks more alcohol units per occasion  
Stable unemployed vs. Stable employed

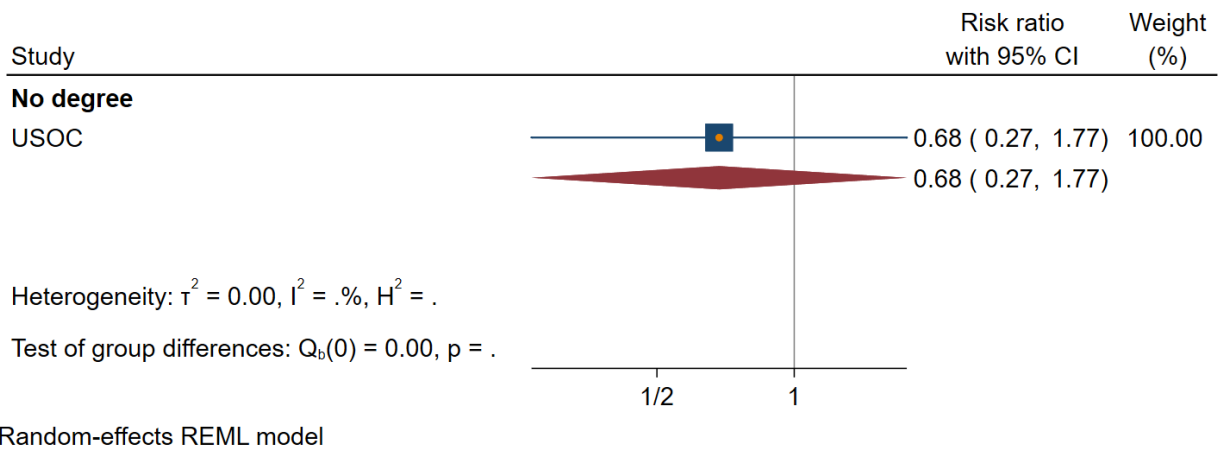

# Figure set 21: Drinks fewer alcohol units per occasions

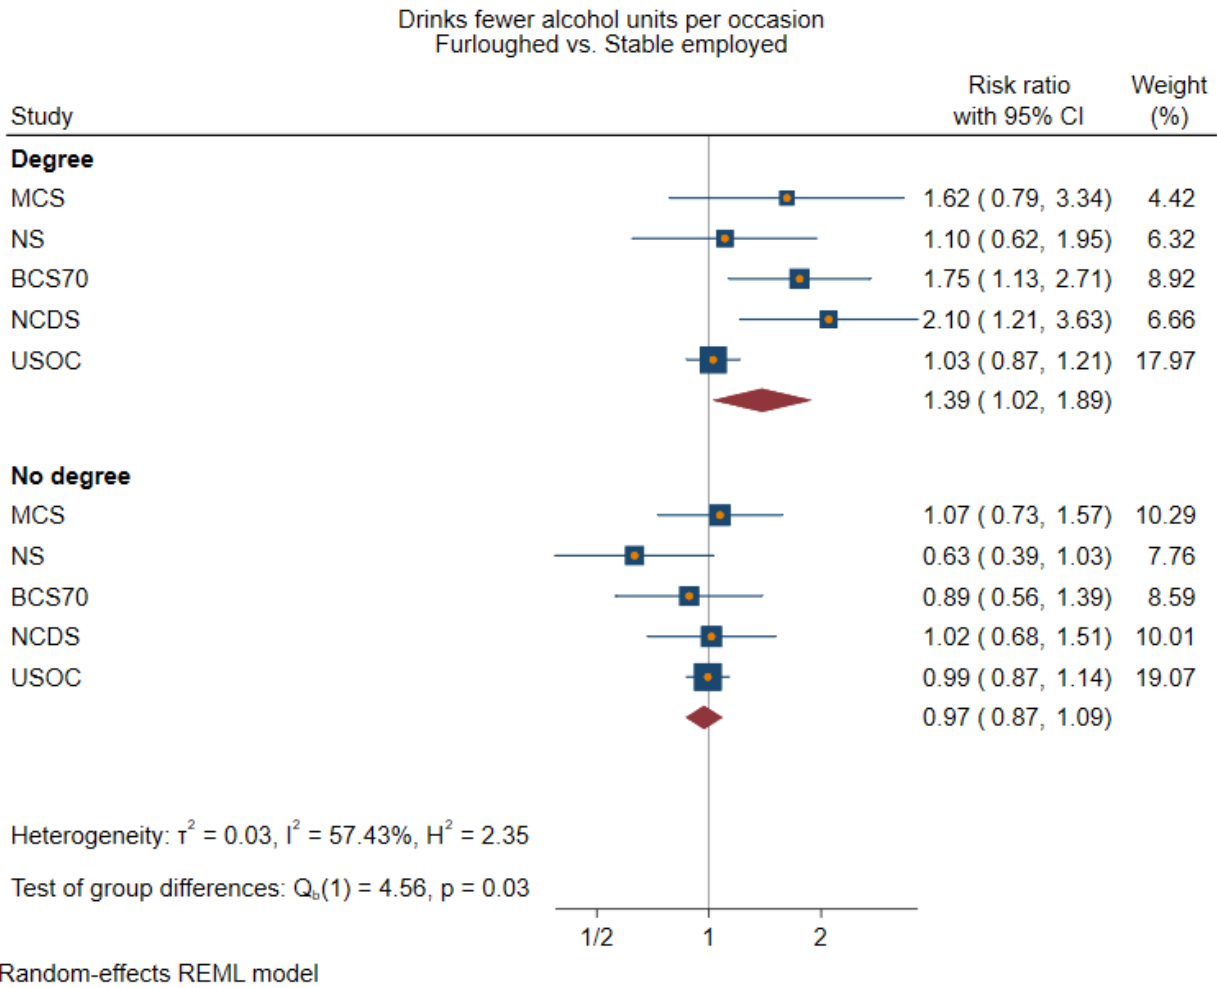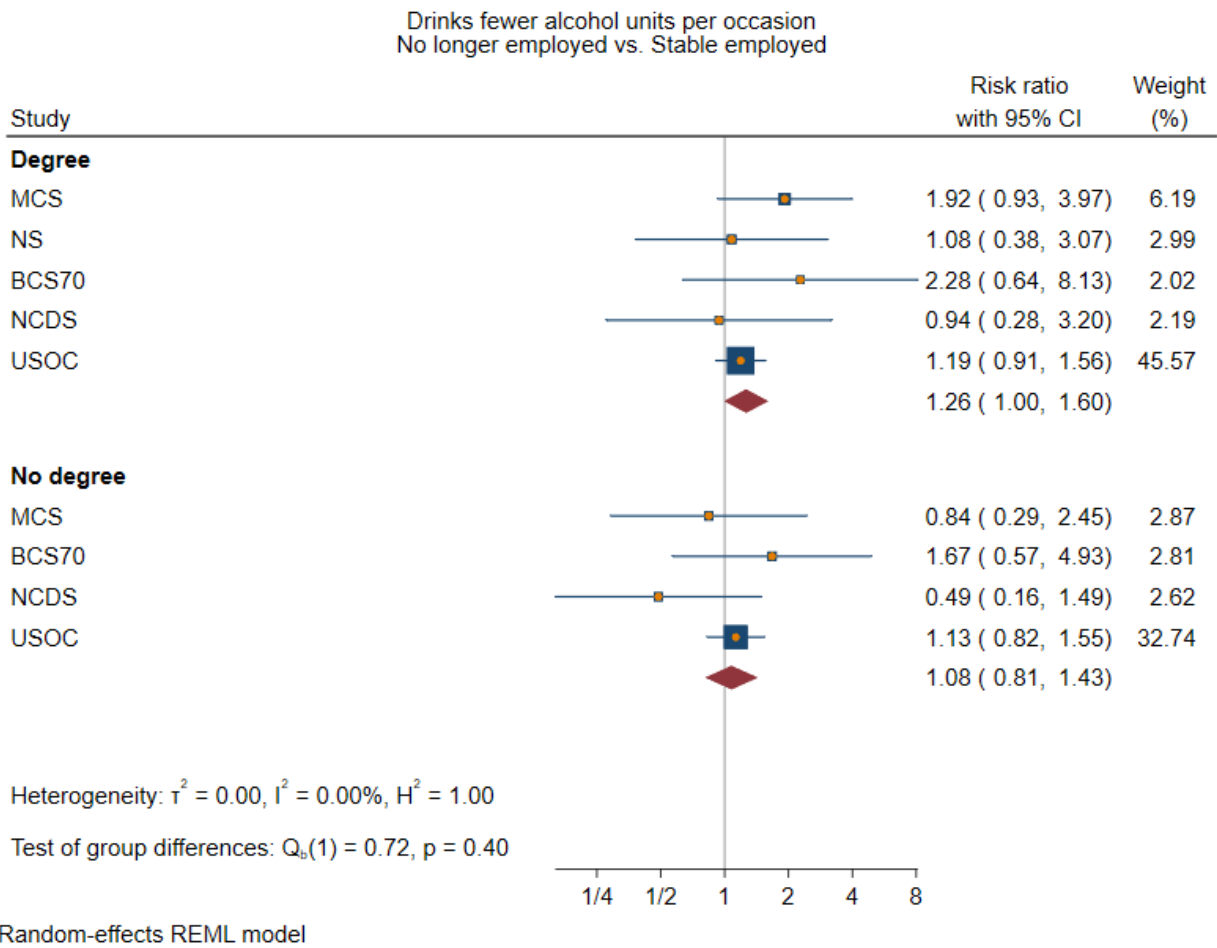

Drinks fewer alcohol units per occasion  
Stable unemployed vs. Stable employed

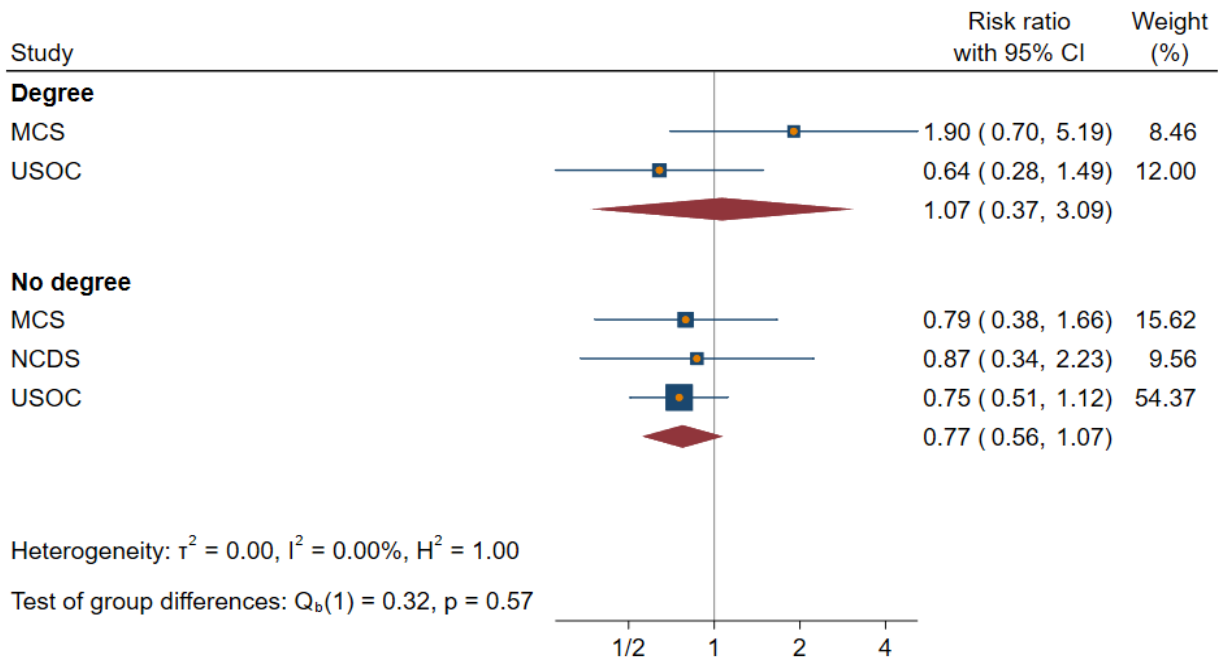

Random-effects REML model

Drinks fewer alcohol units per occasion  
Stable non-employed vs. Stable employed

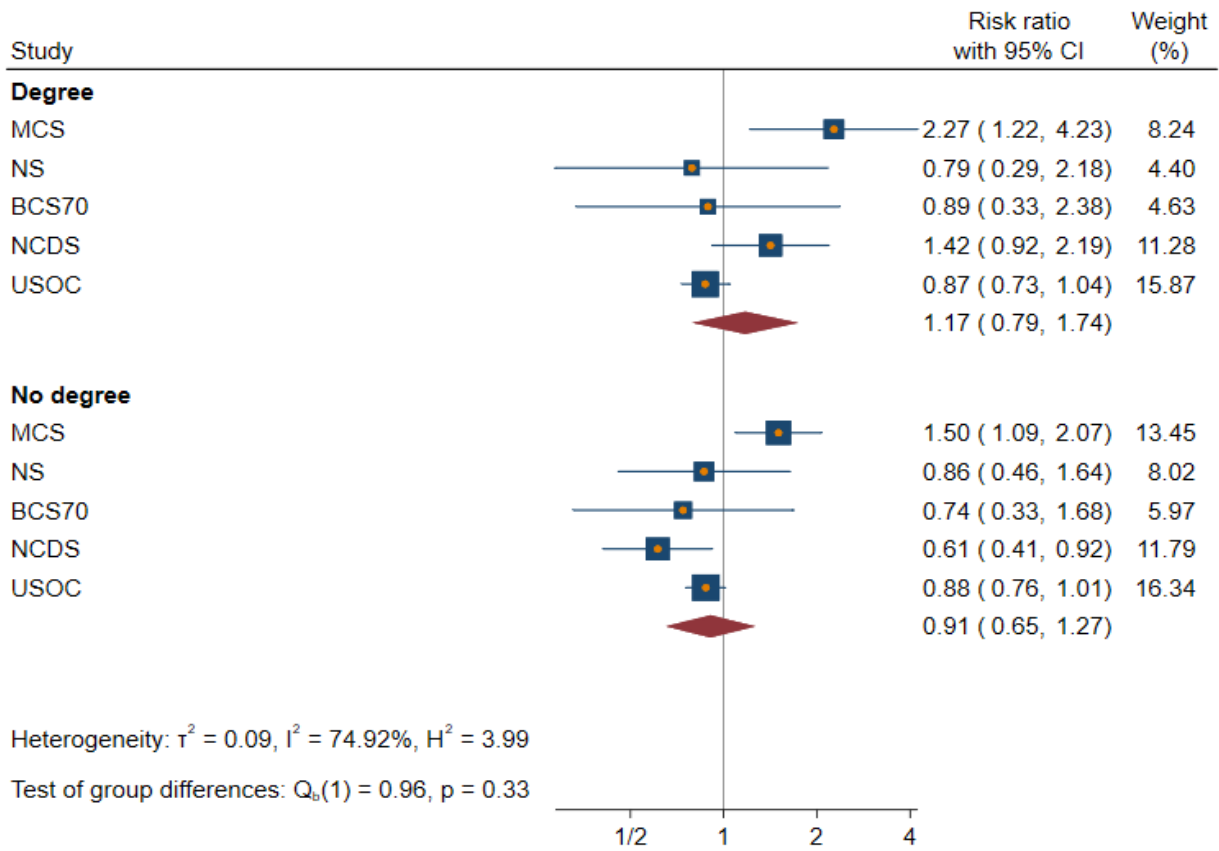

Random-effects REML model

## Figure set 22: Currently drinks 4+ days/week

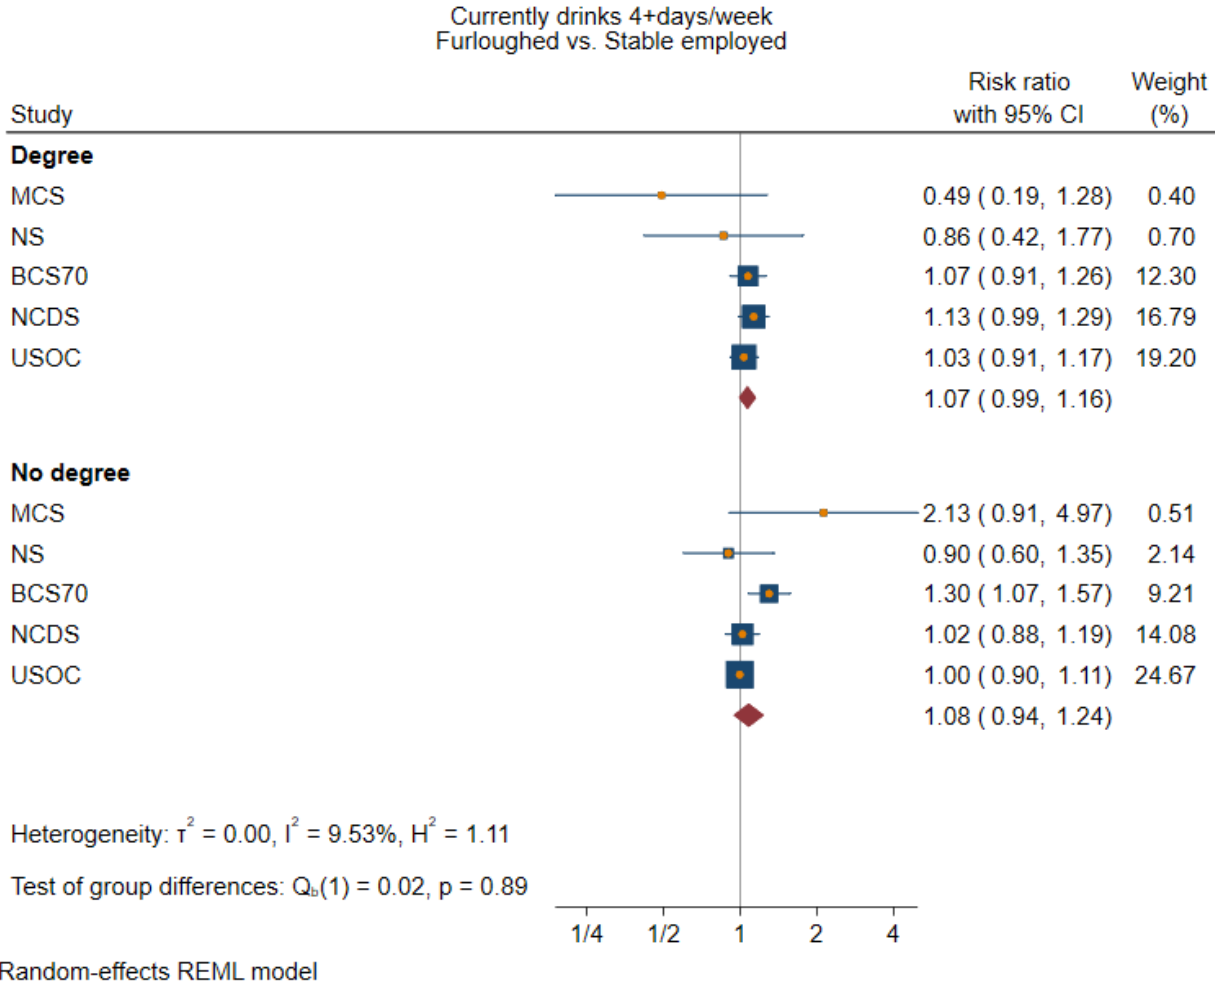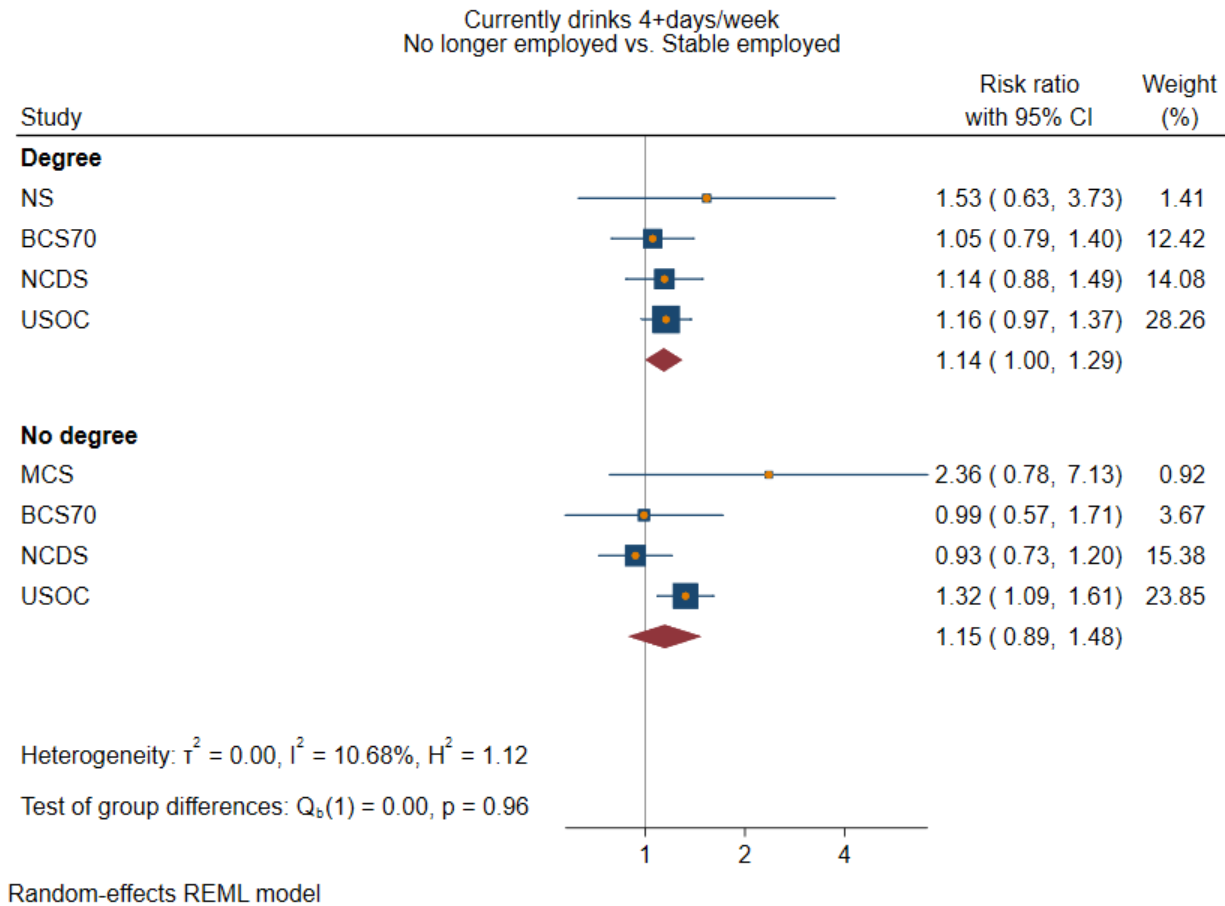

Currently drinks 4+days/week  
Stable unemployed vs. Stable employed

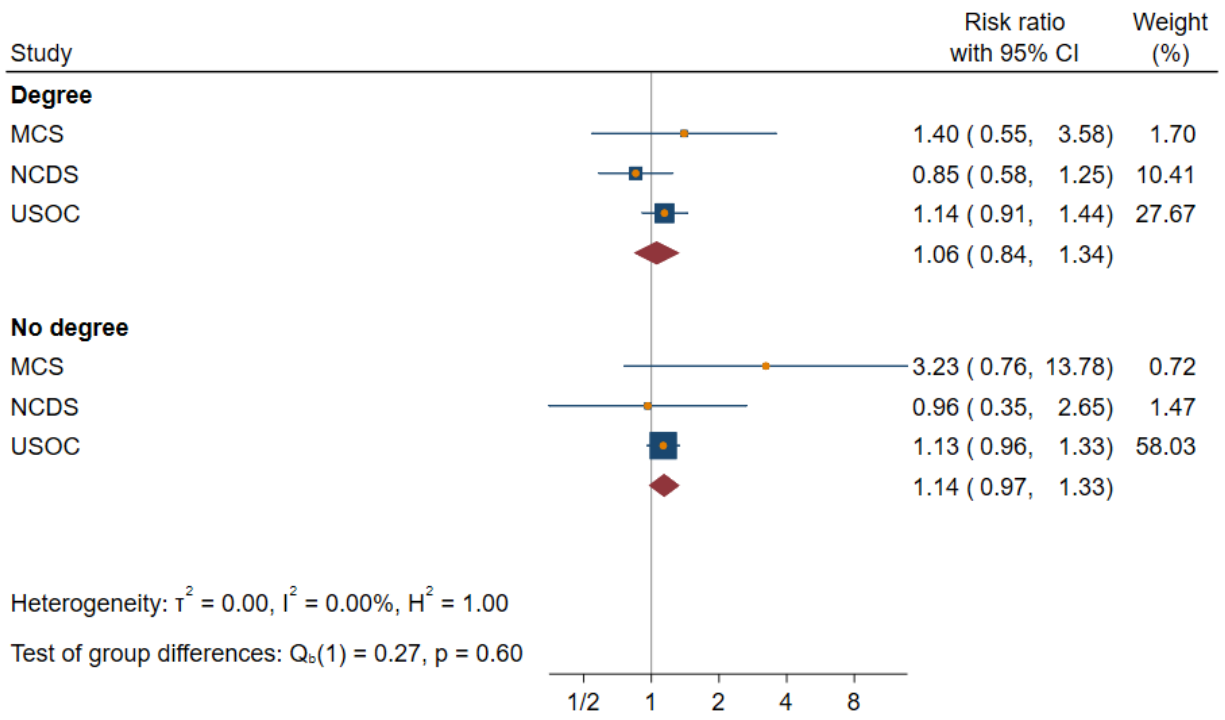

## Figure set 23: Drinks more frequently

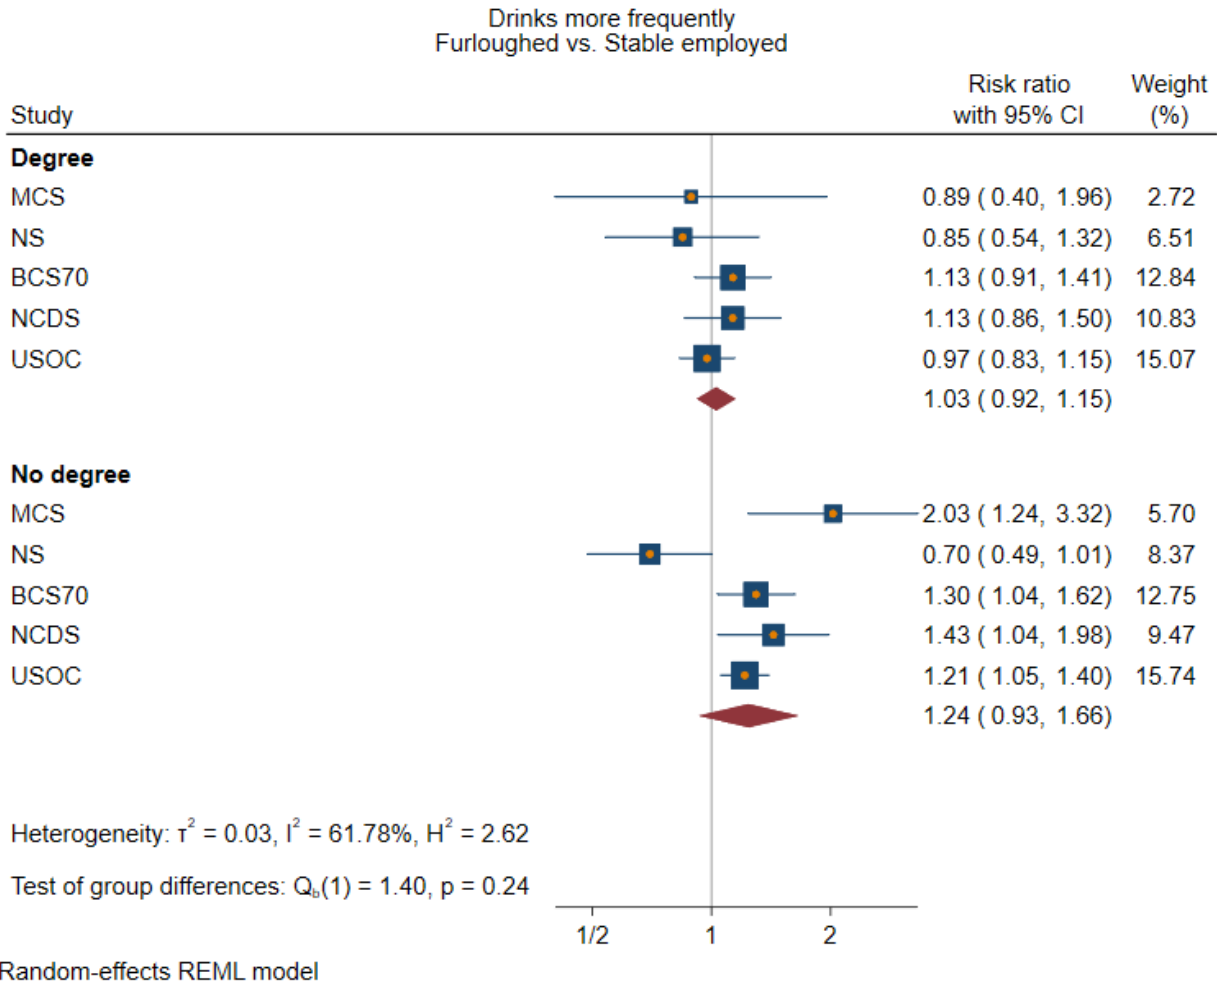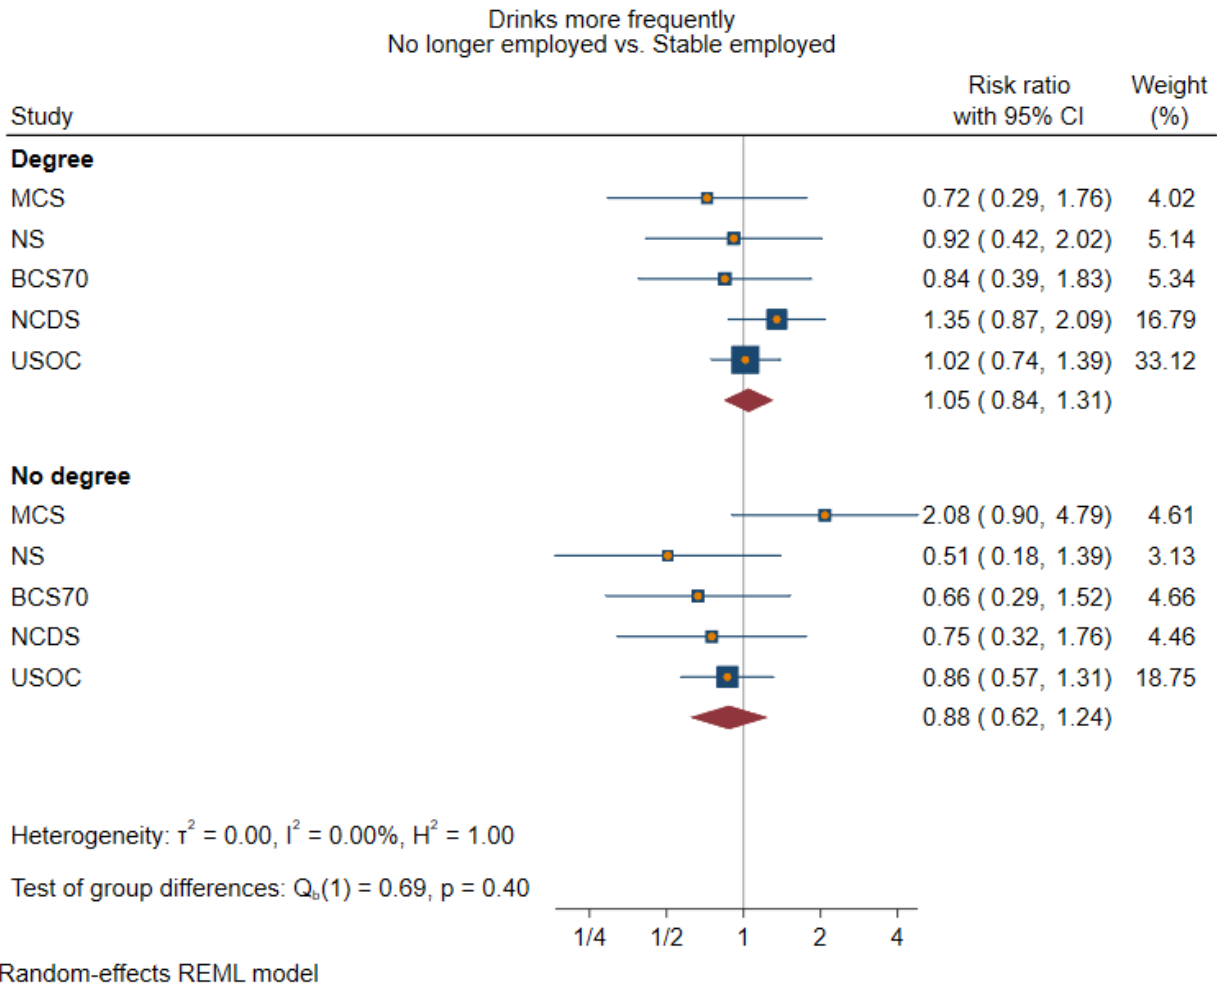

Drinks more frequently  
Stable unemployed vs. Stable employed

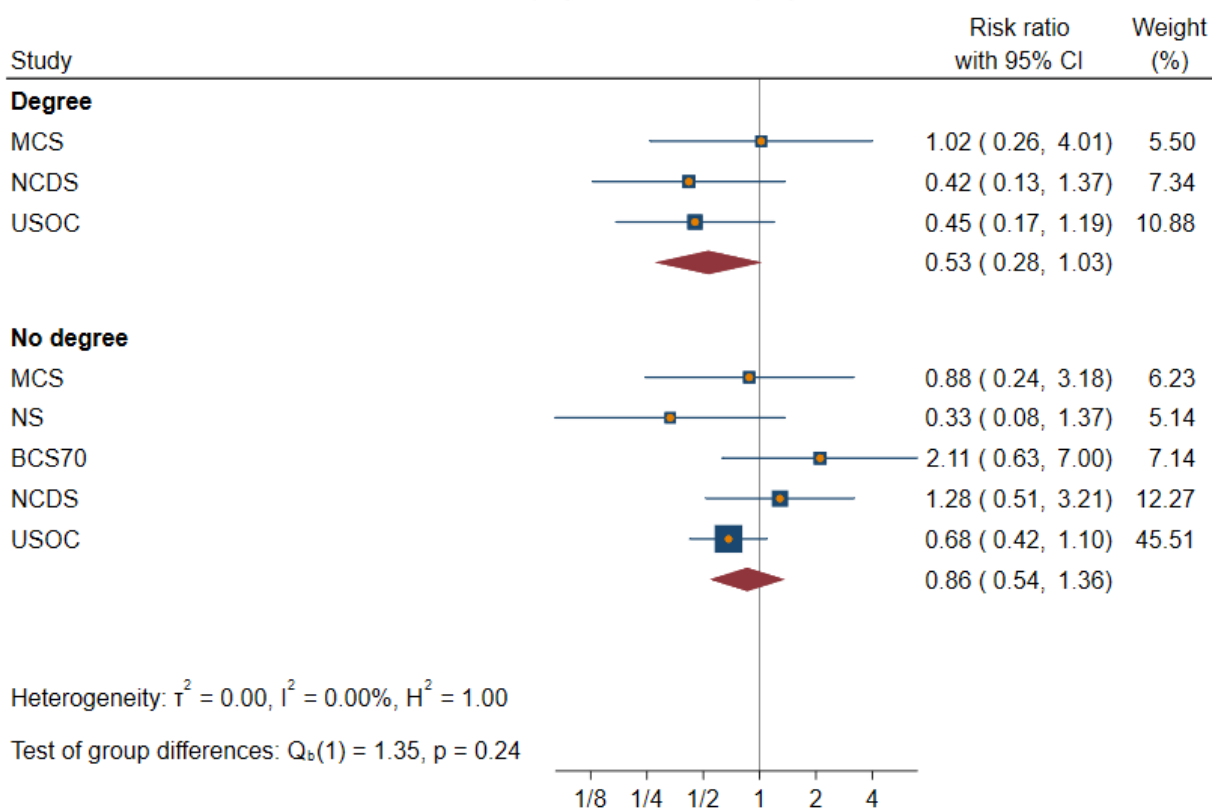

Random-effects REML model



## Figure set 24: Drinks less frequently

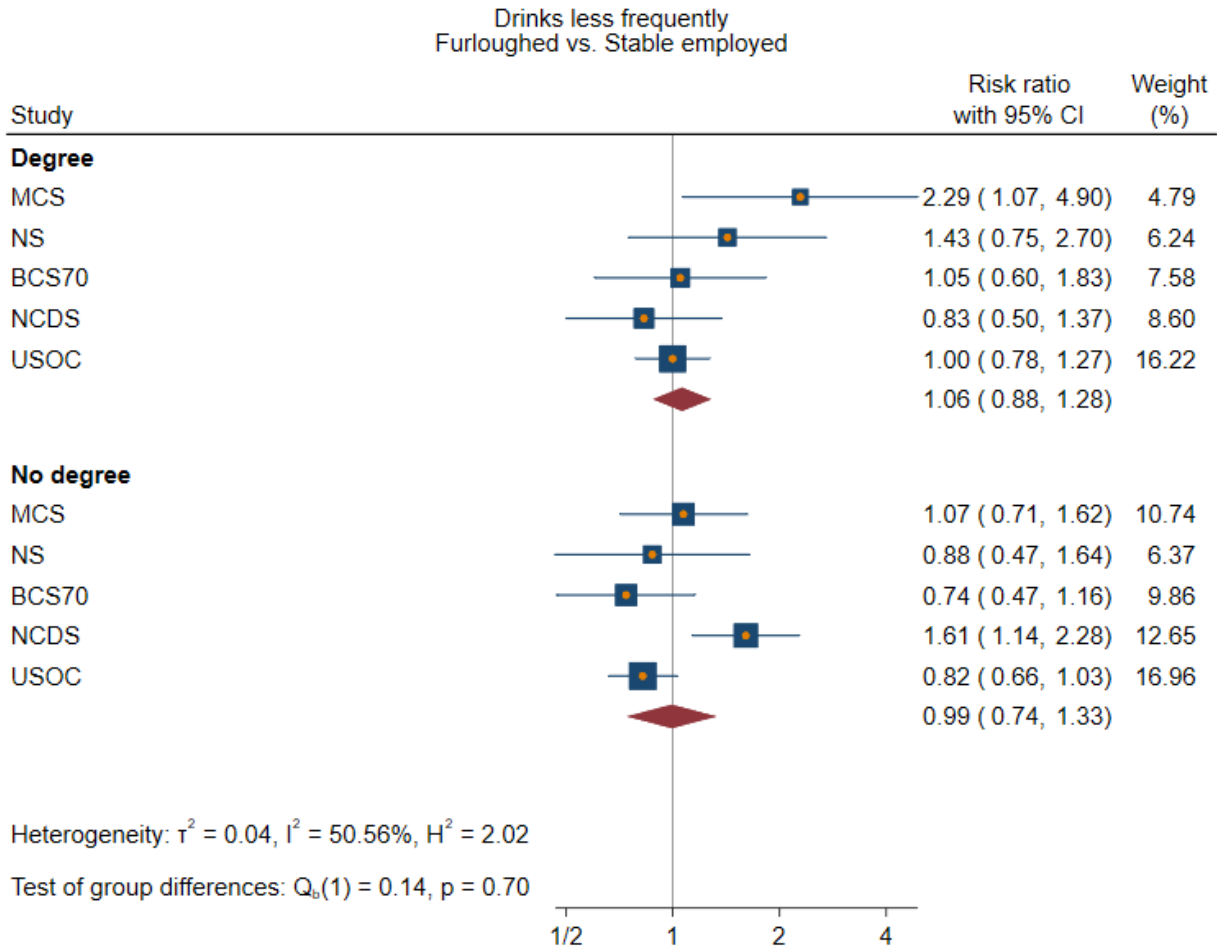

Random-effects REML model

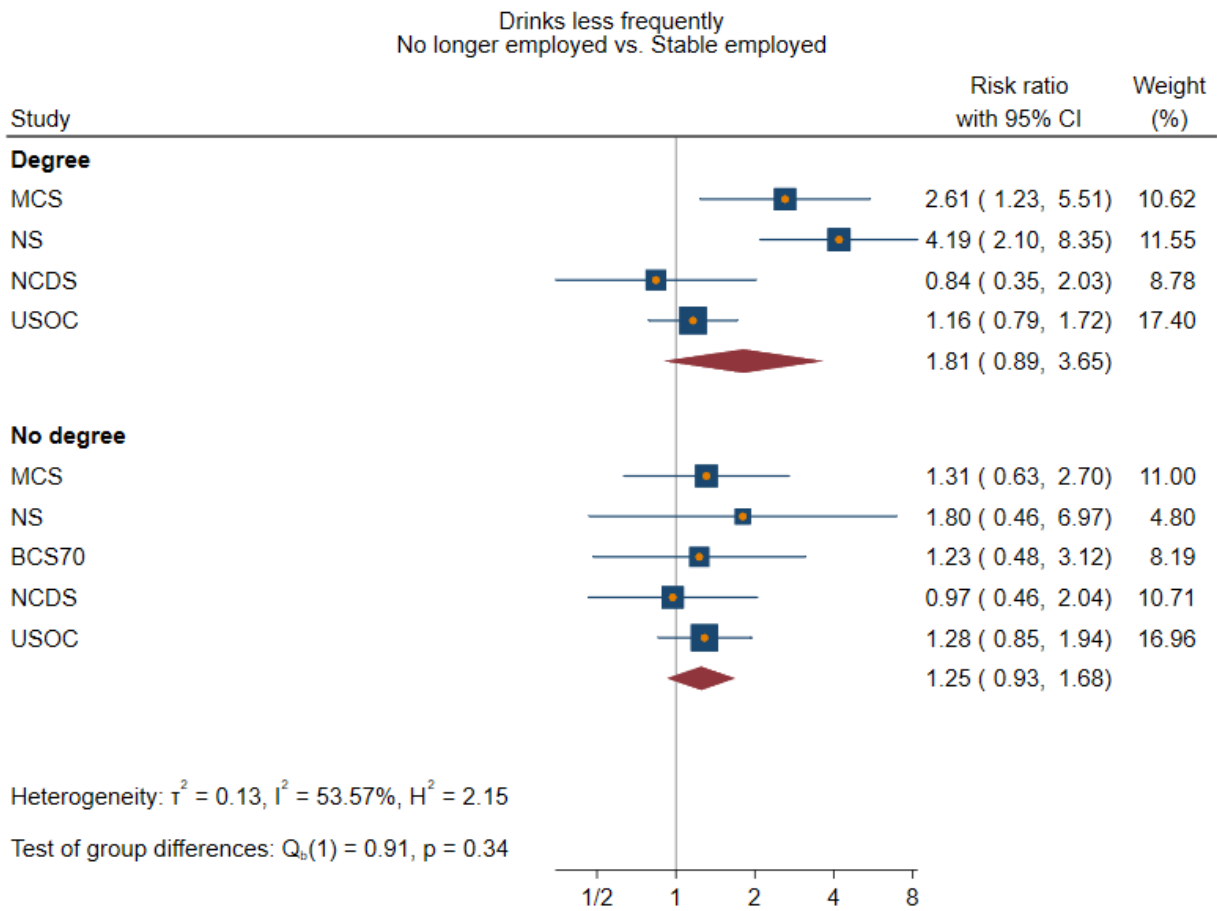

Random-effects REML model

Drinks less frequently  
Stable unemployed vs. Stable employed

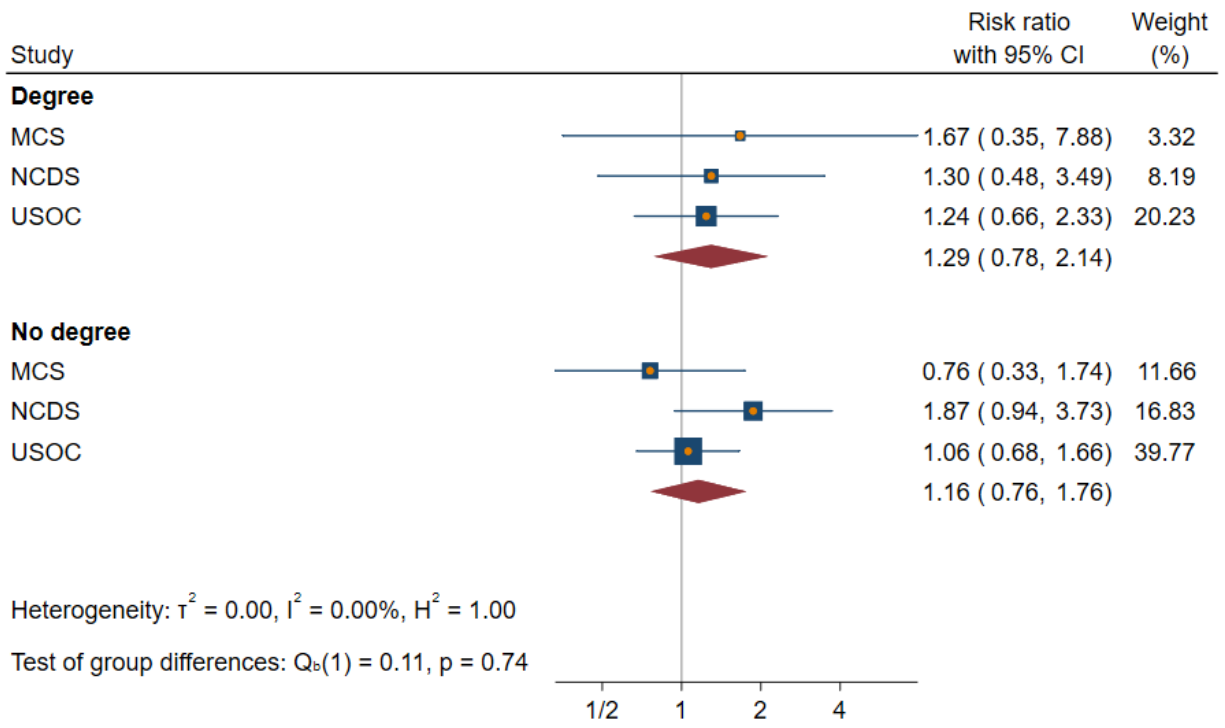

Random-effects REML model

### Figure set 24: Current smoker

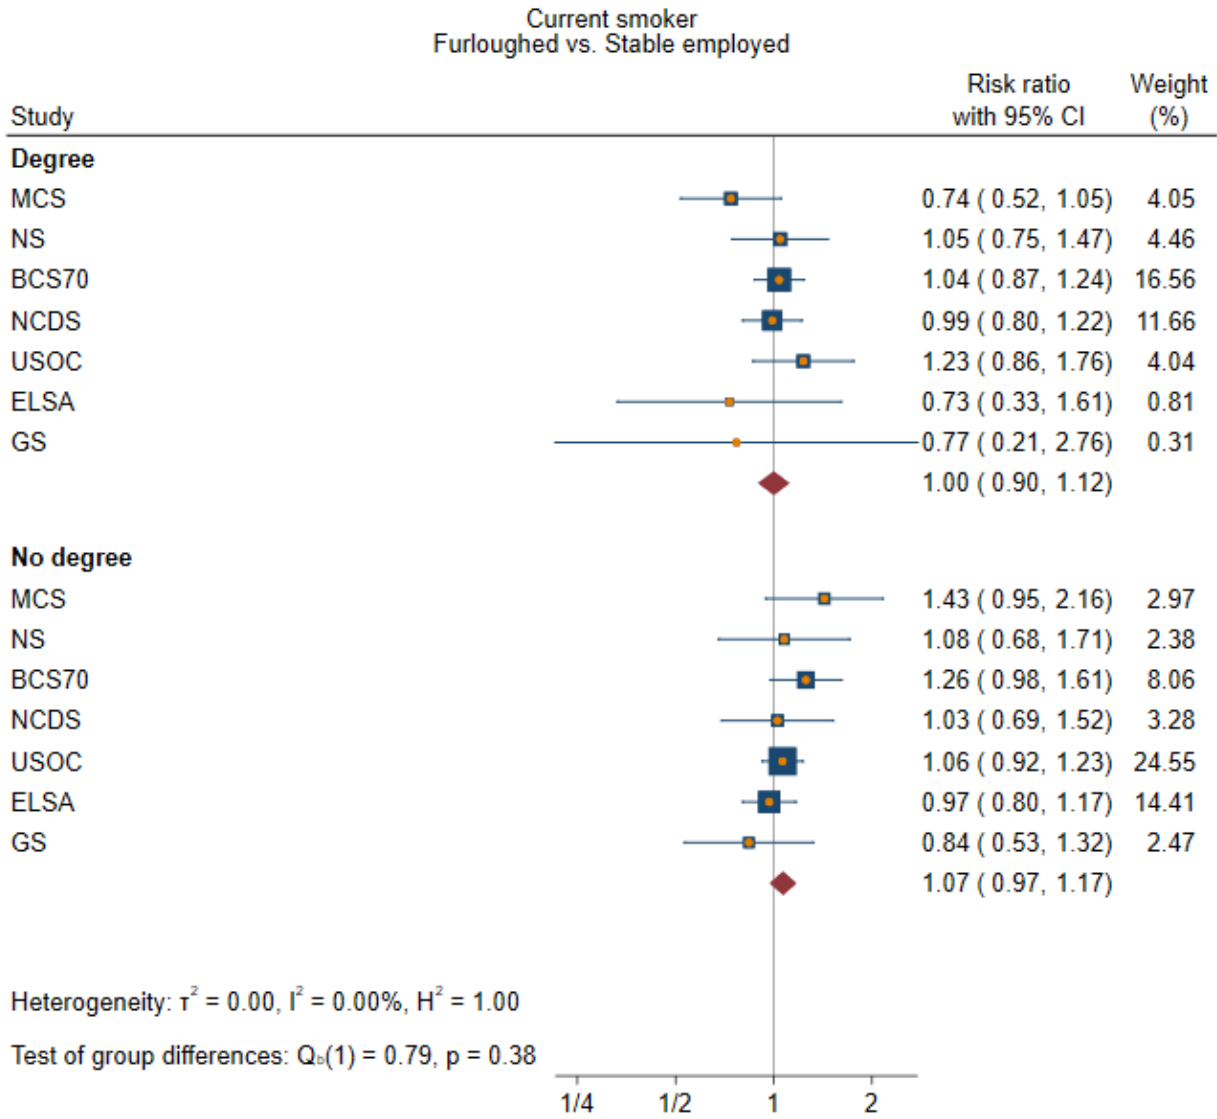

Random-effects REML model

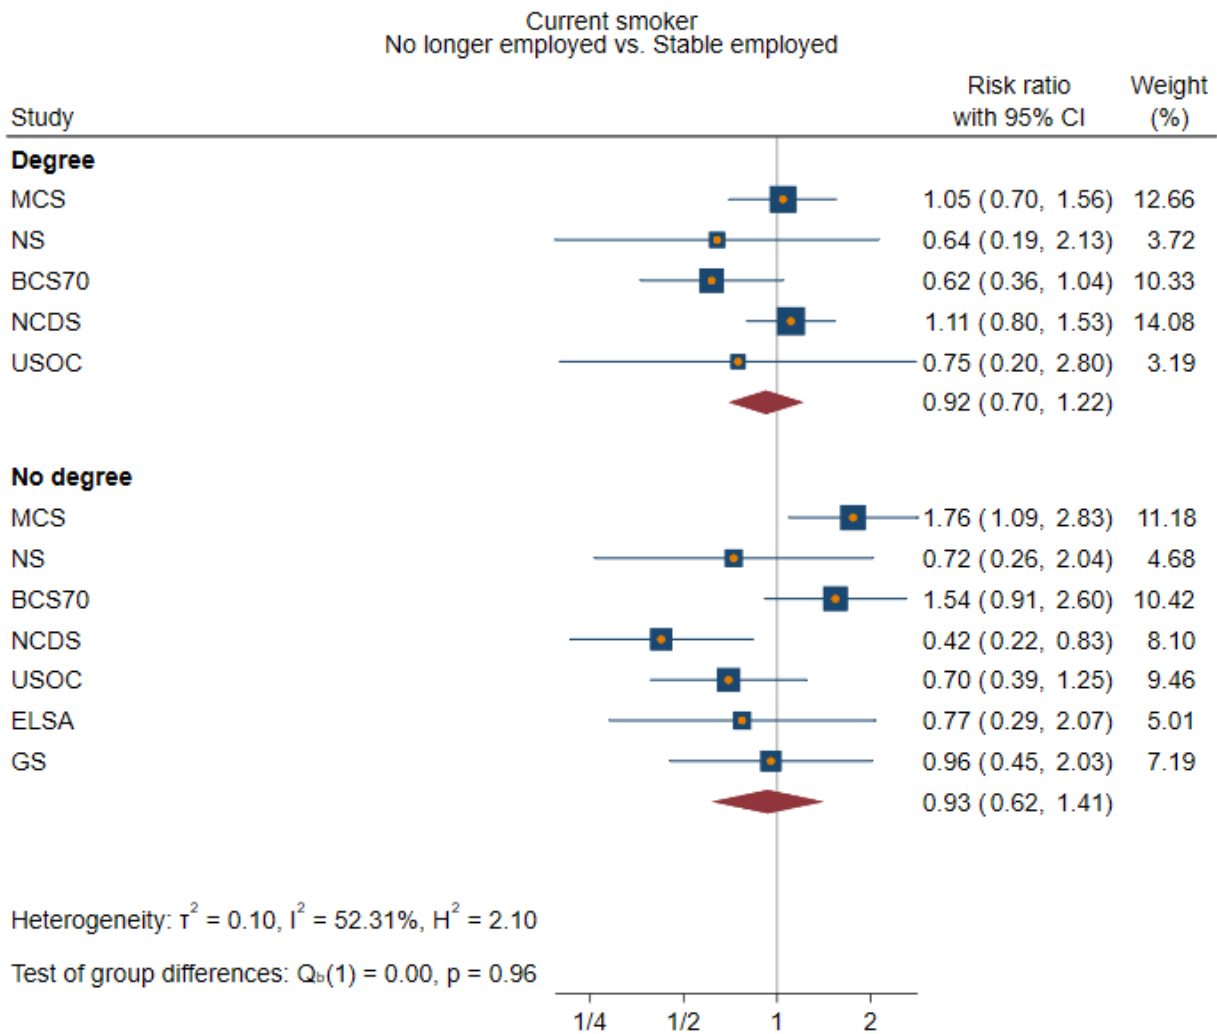

Random-effects REML model

Current smoker  
Stable unemployed vs. Stable employed

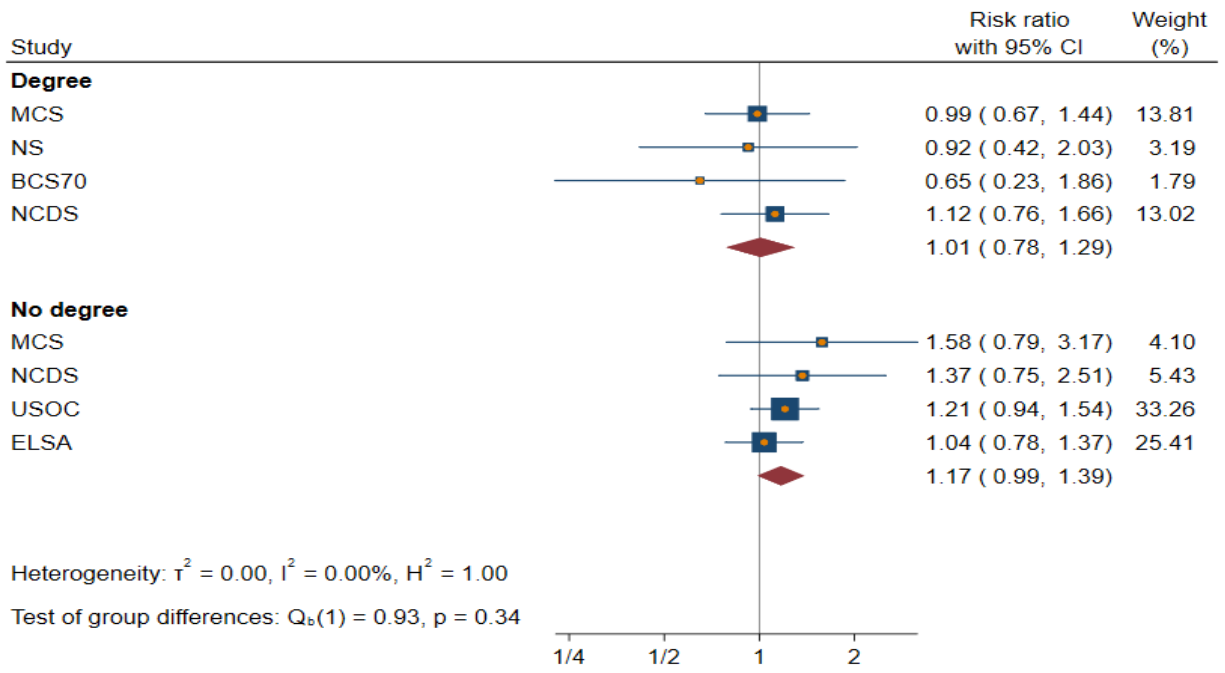

## Figure set 26: Smoking more

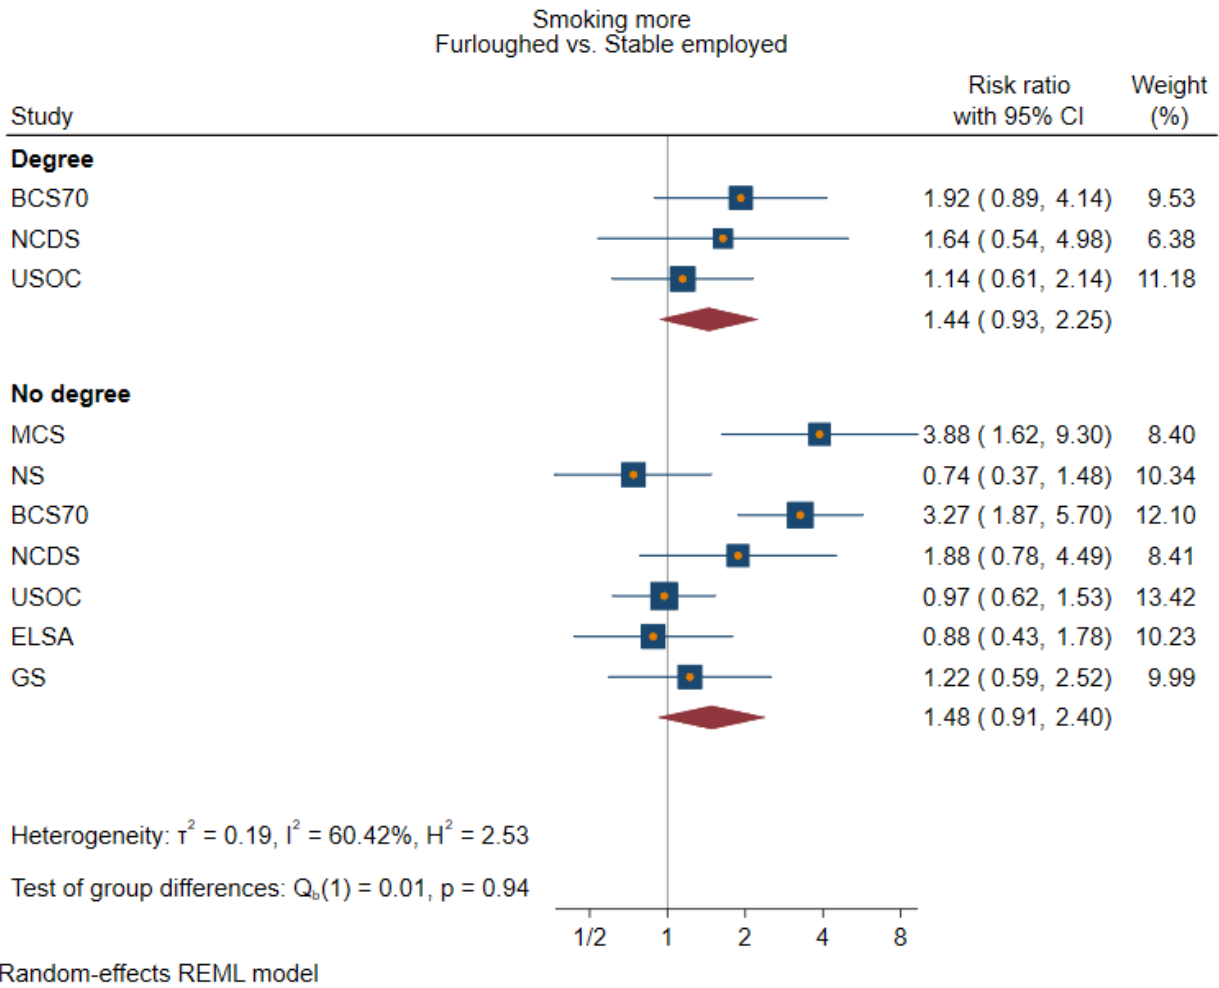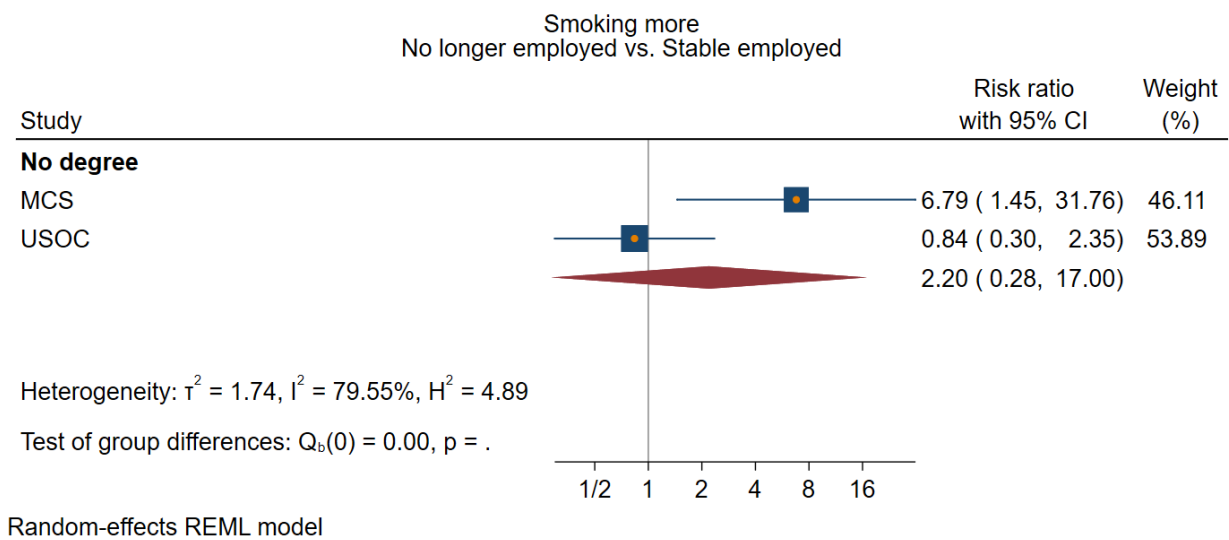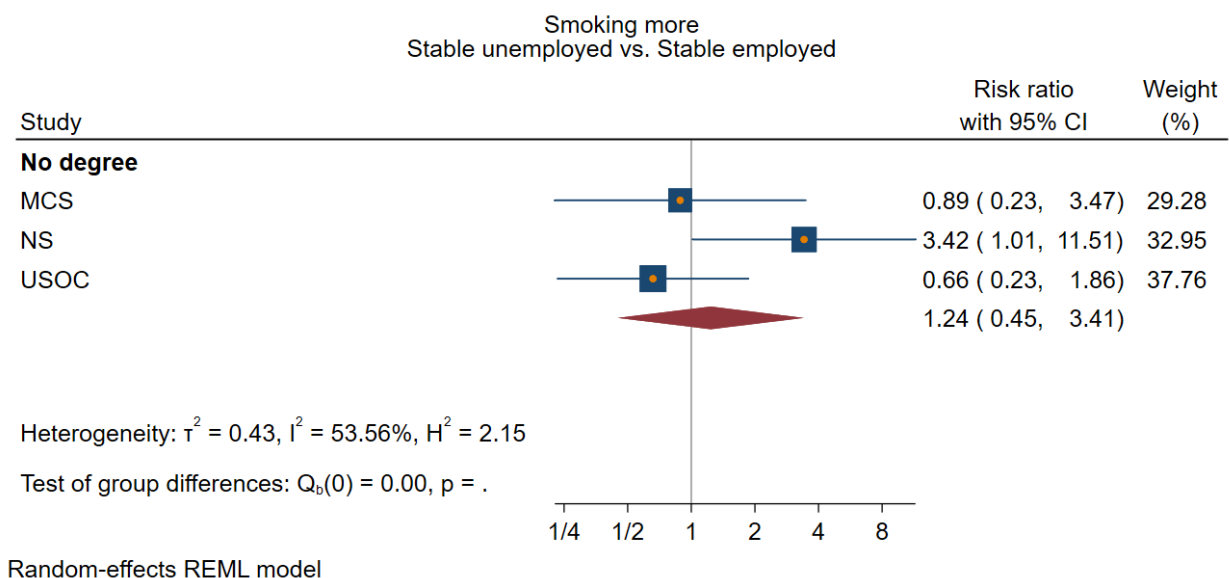

## Figure set 27: Smoking less

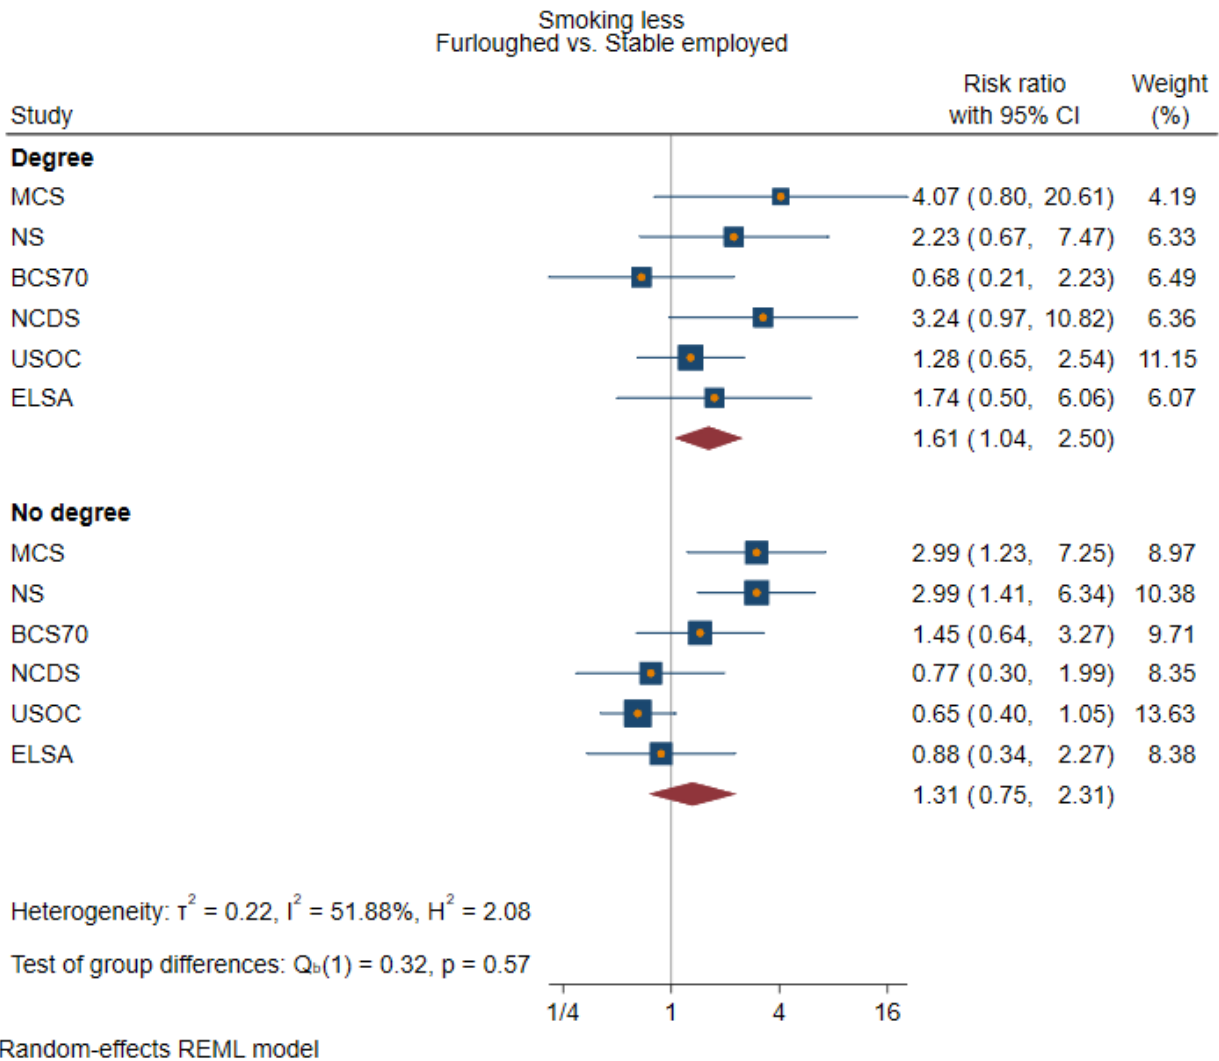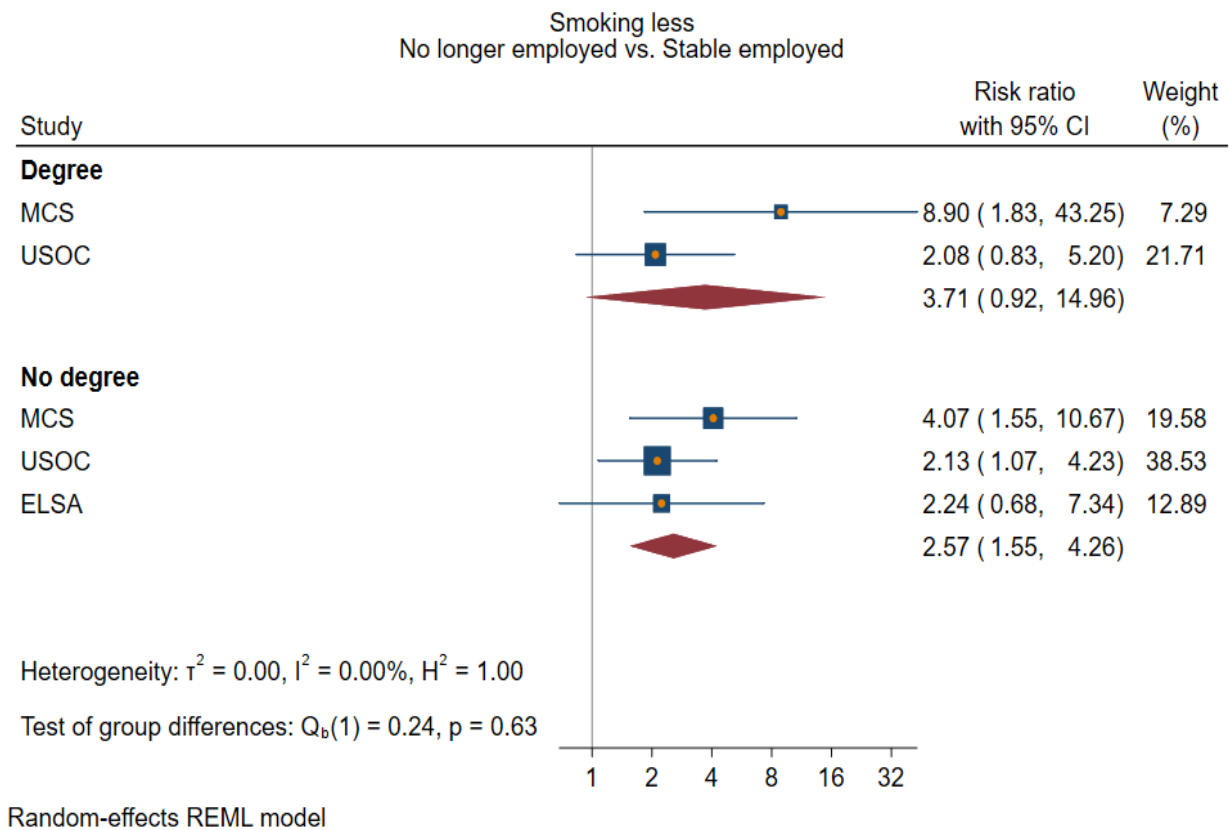

Smoking less  
Stable unemployed vs. Stable employed

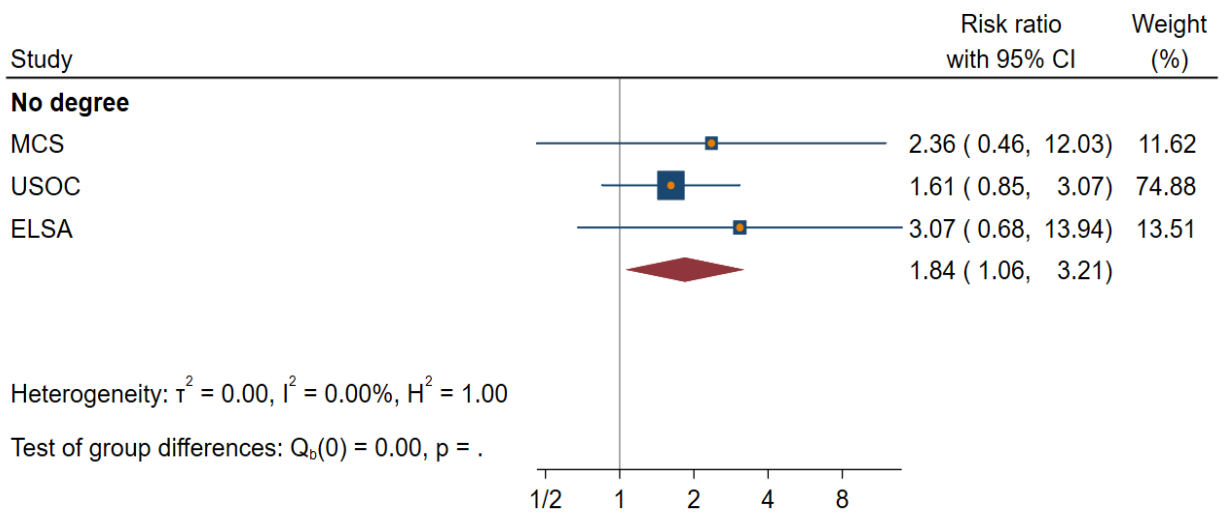

Random-effects REML model

## Figure set 28: Current vaper

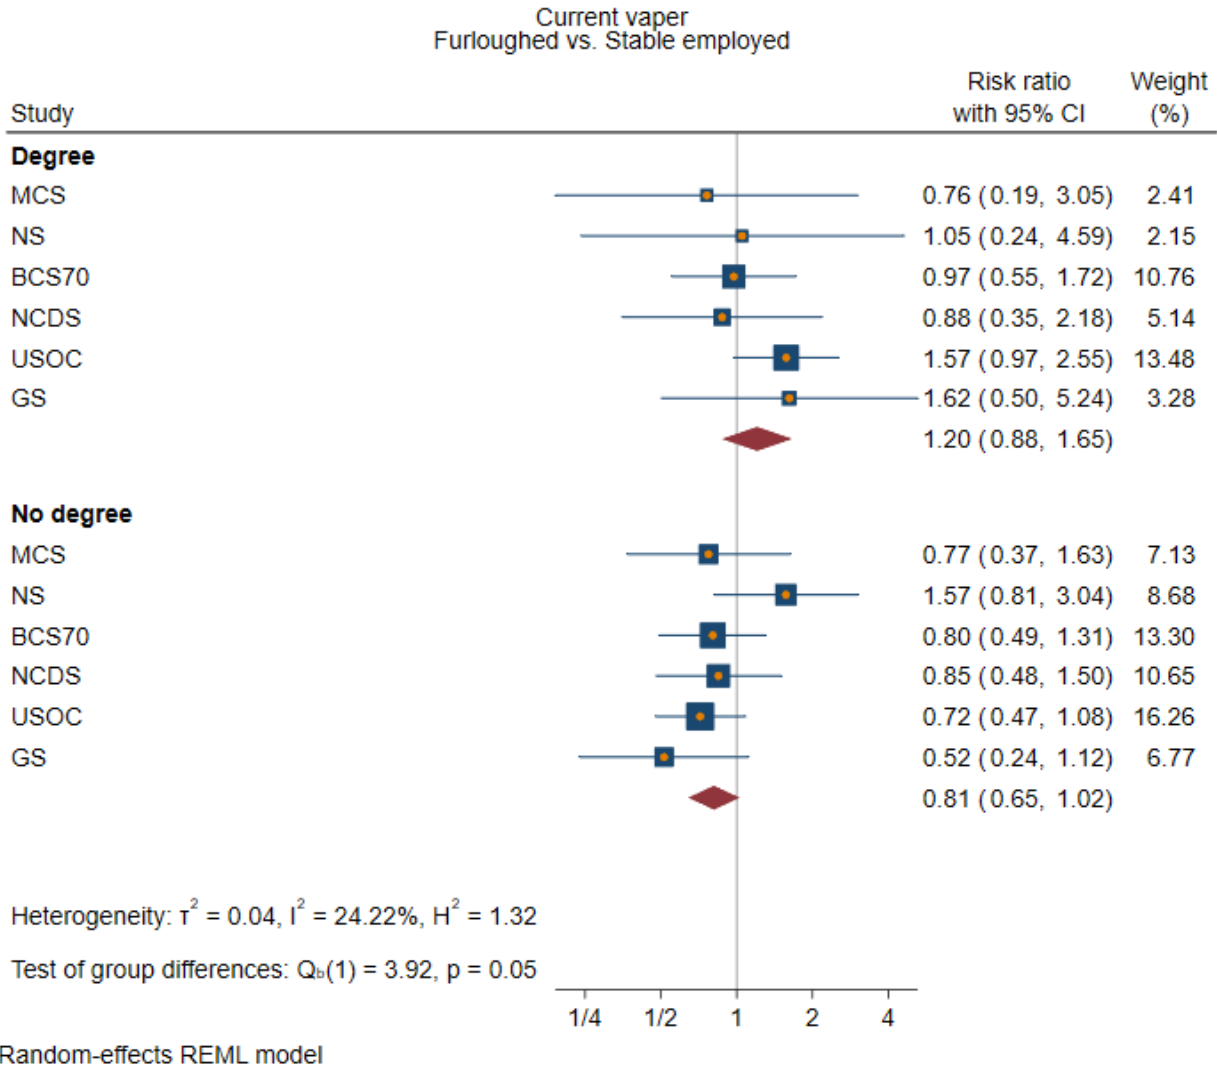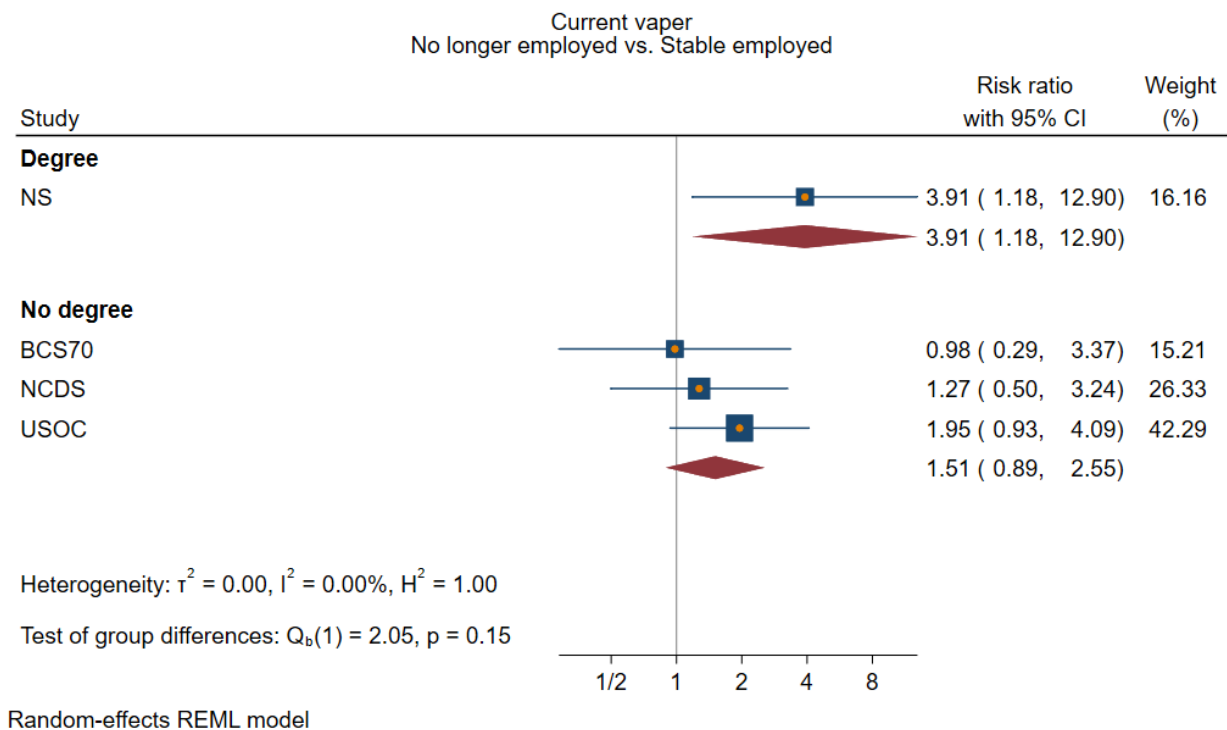



Current vaper  
Stable unemployed vs. Stable employed

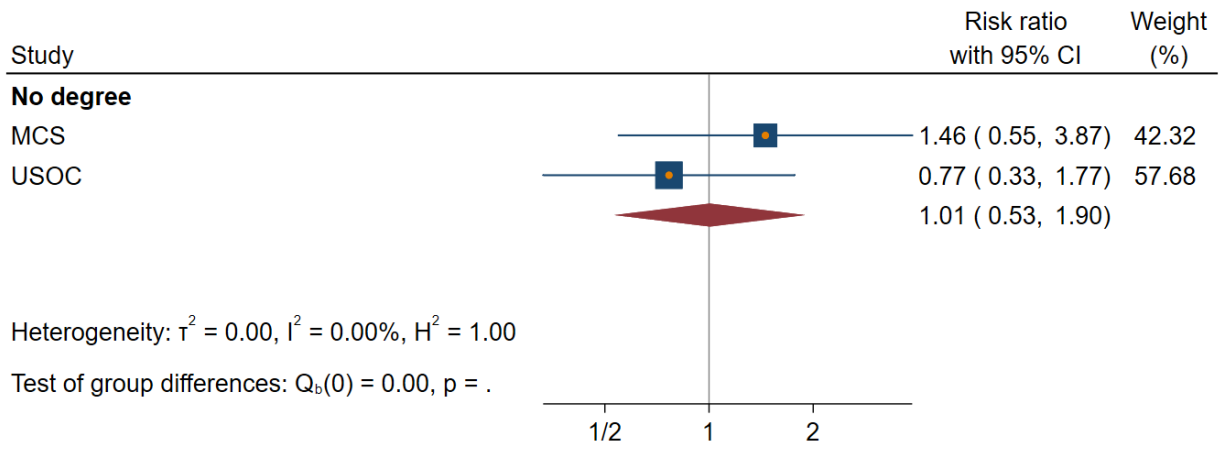

Random-effects REML model

## Figure set 29: Vaping more

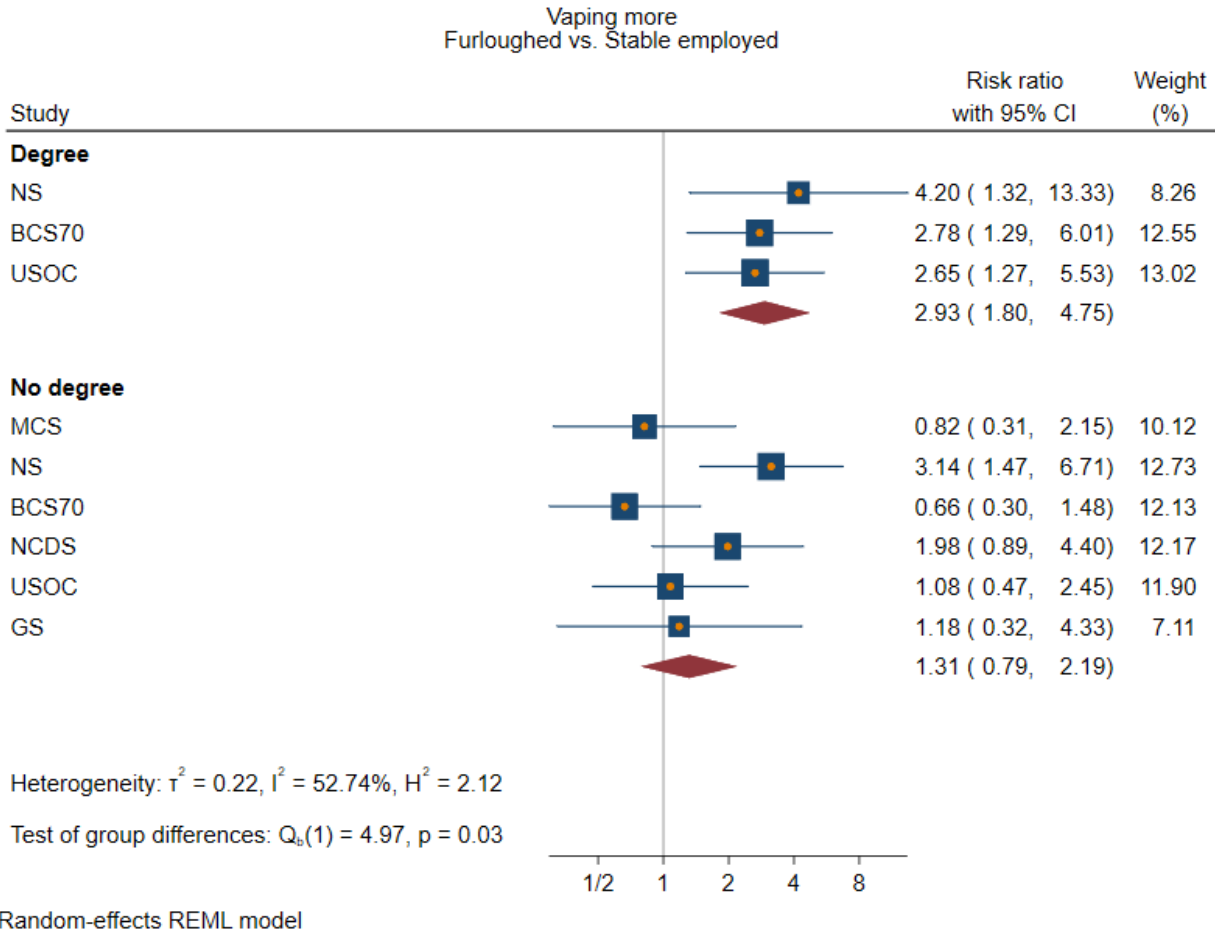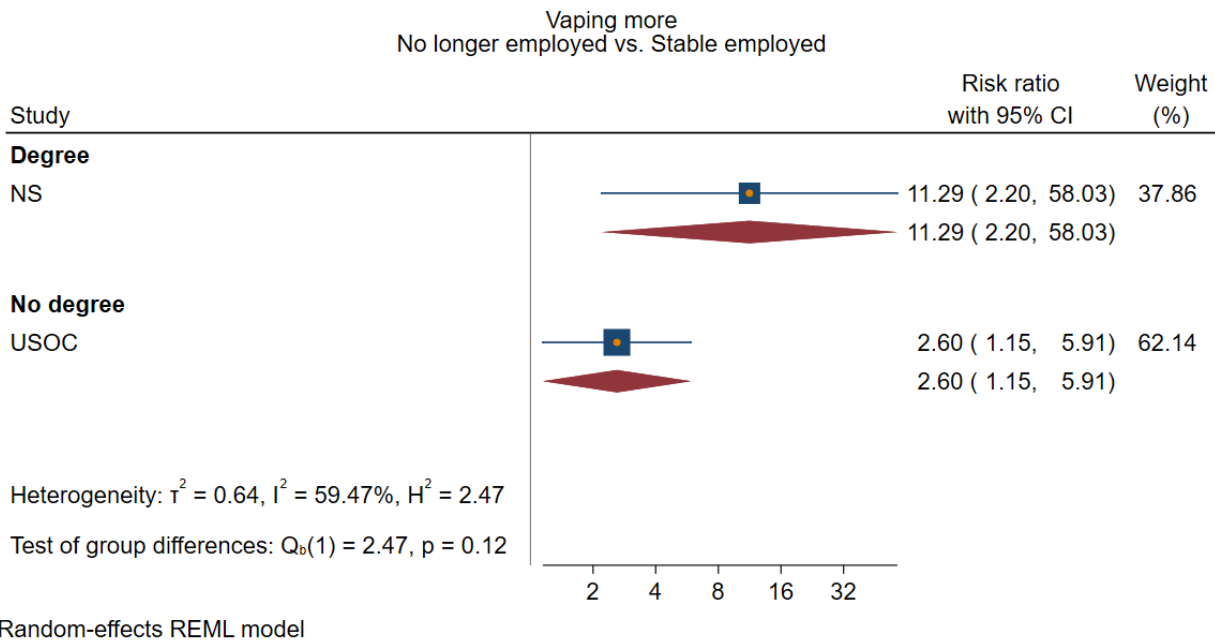

Vaping more  
Stable unemployed vs. Stable employed

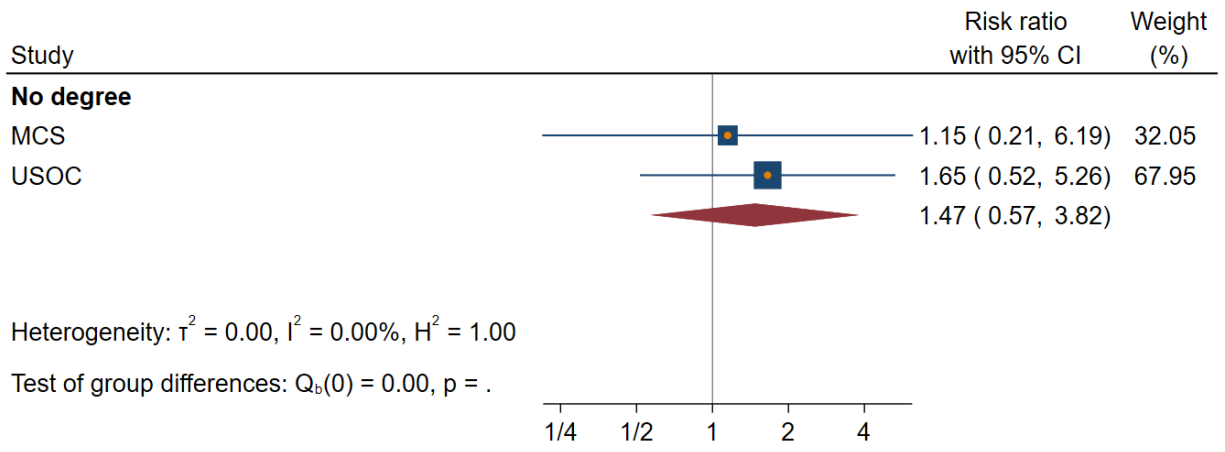

Random-effects REML model

## Figure set 30: Vaping less

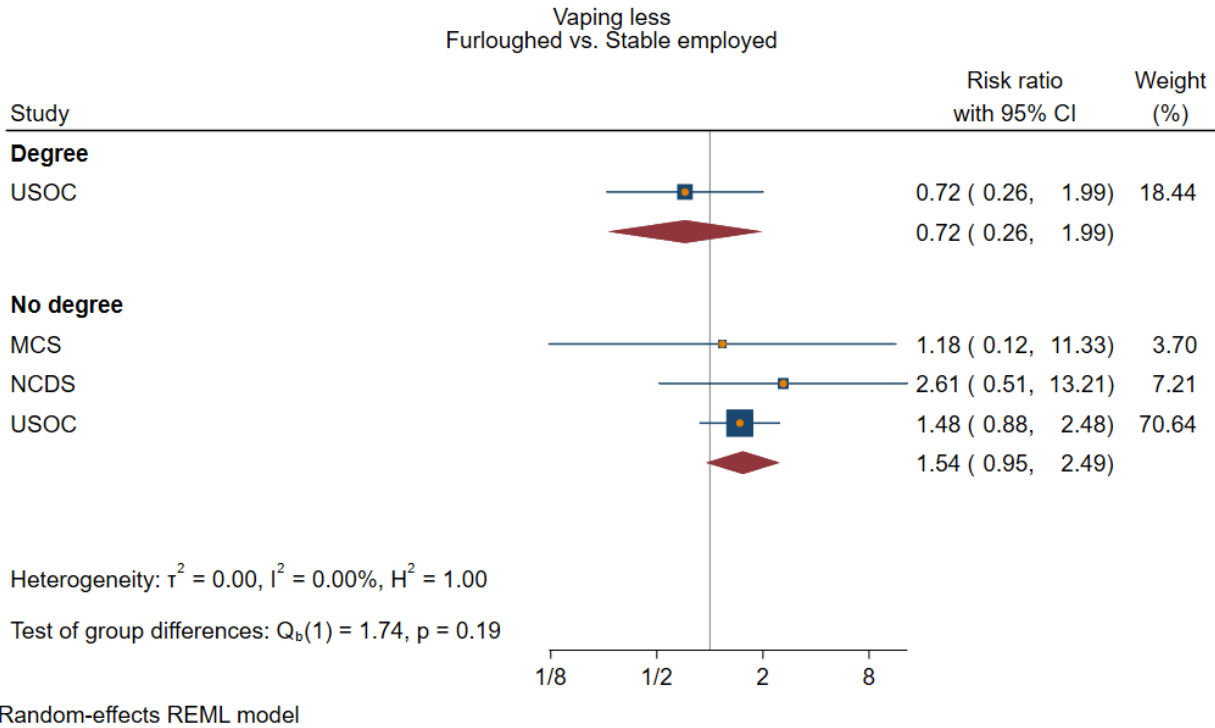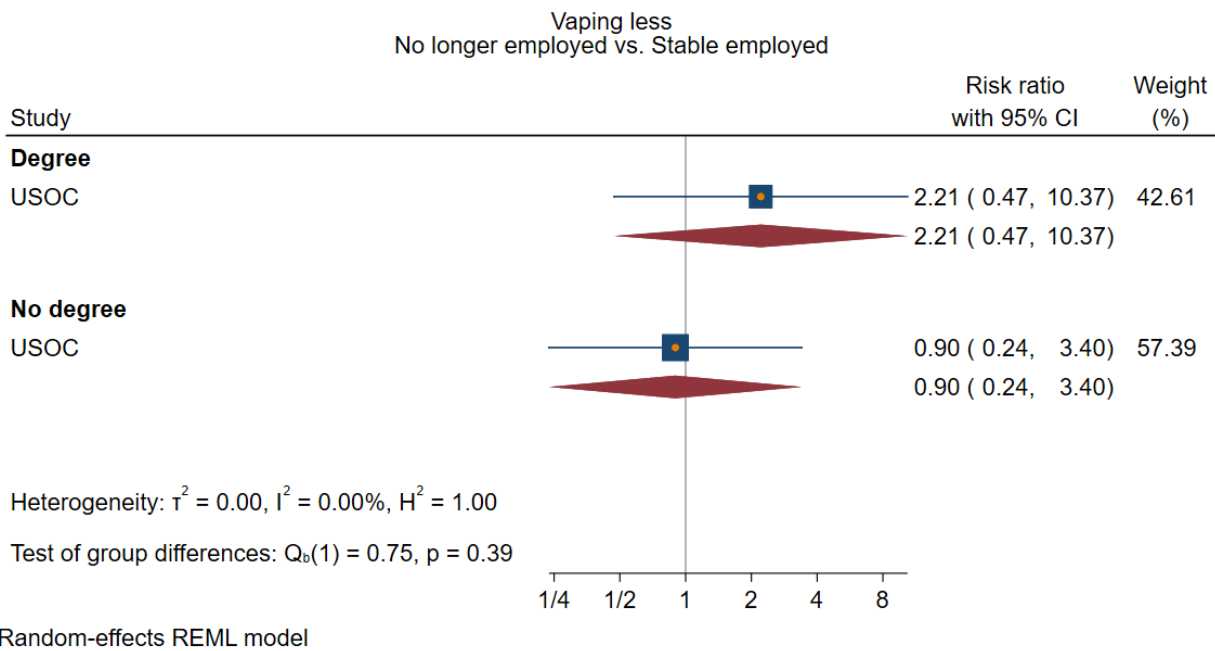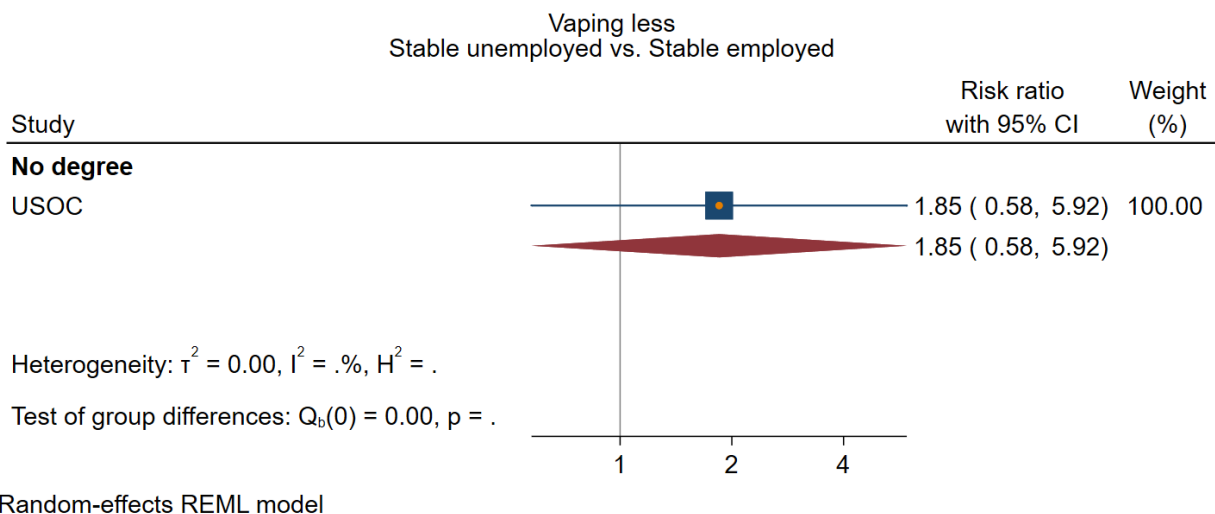



**Figure set 31: Currently drinks 4+ days/week or 5+ drinks/occasion**

Currently drinks 4+days/week or 5+ drinks/occasion)  
Furloughed vs. Stable employed

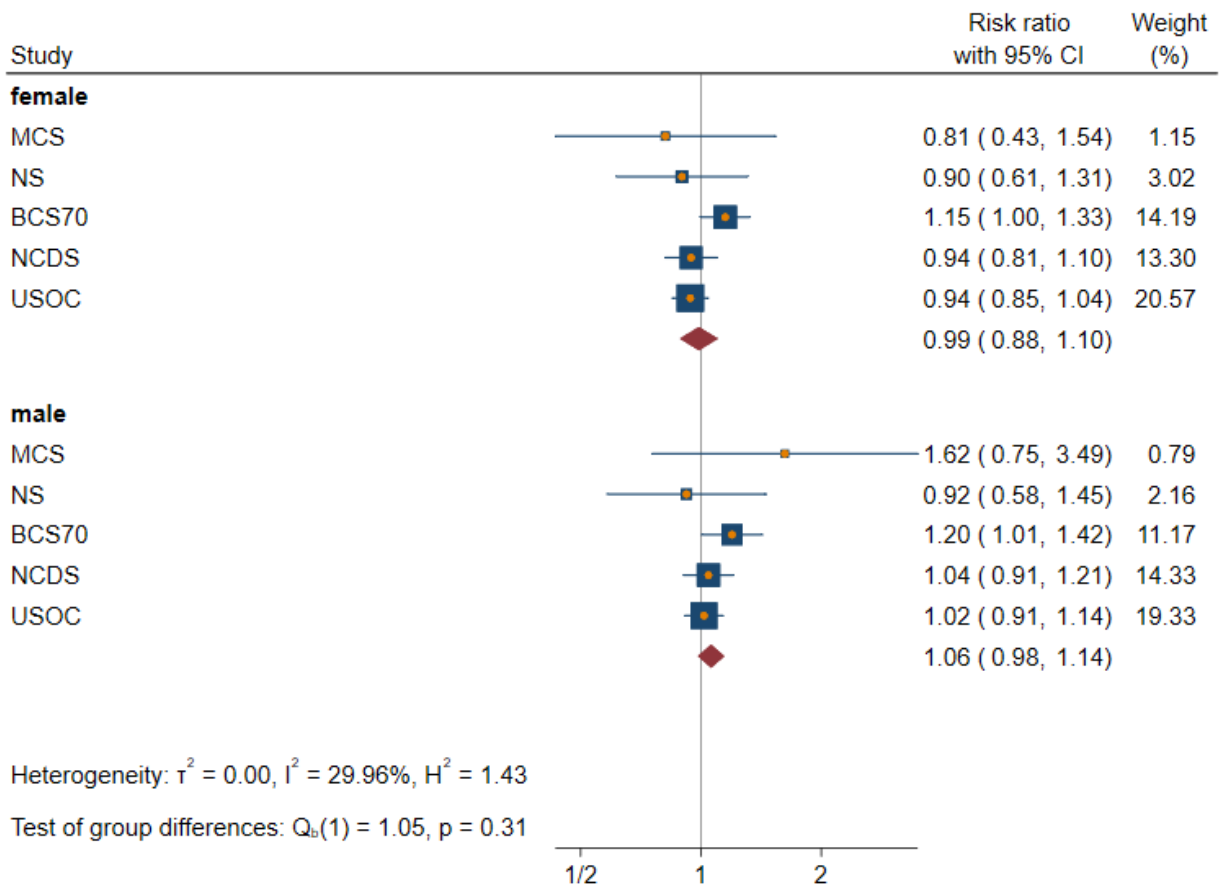

Random-effects REML model

Currently drinks 4+days/week or 5+ drinks/occasion)  
No longer employed vs. Stable employed

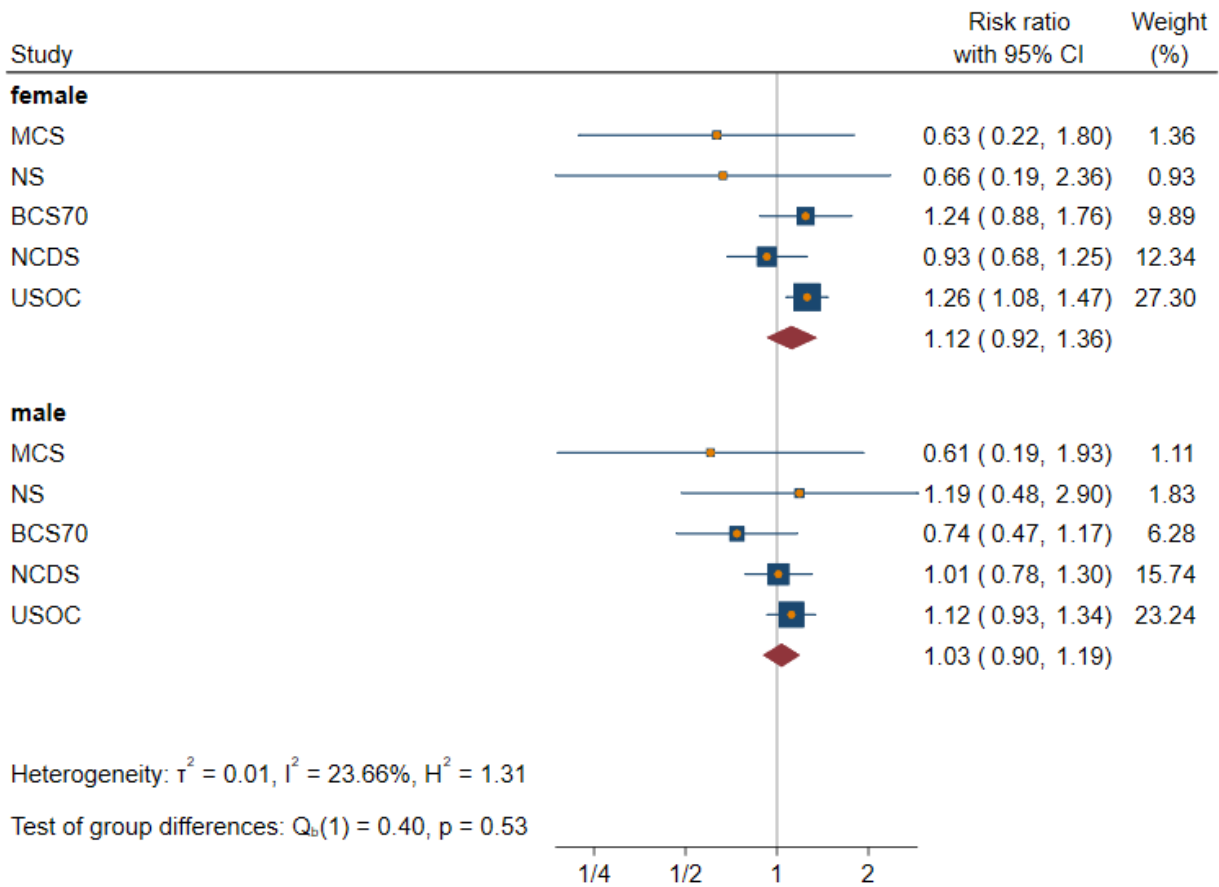

Random-effects REML model

Currently drinks 4+days/week or 5+ drinks/occasion)  
 Stable unemployed vs. Stable employed

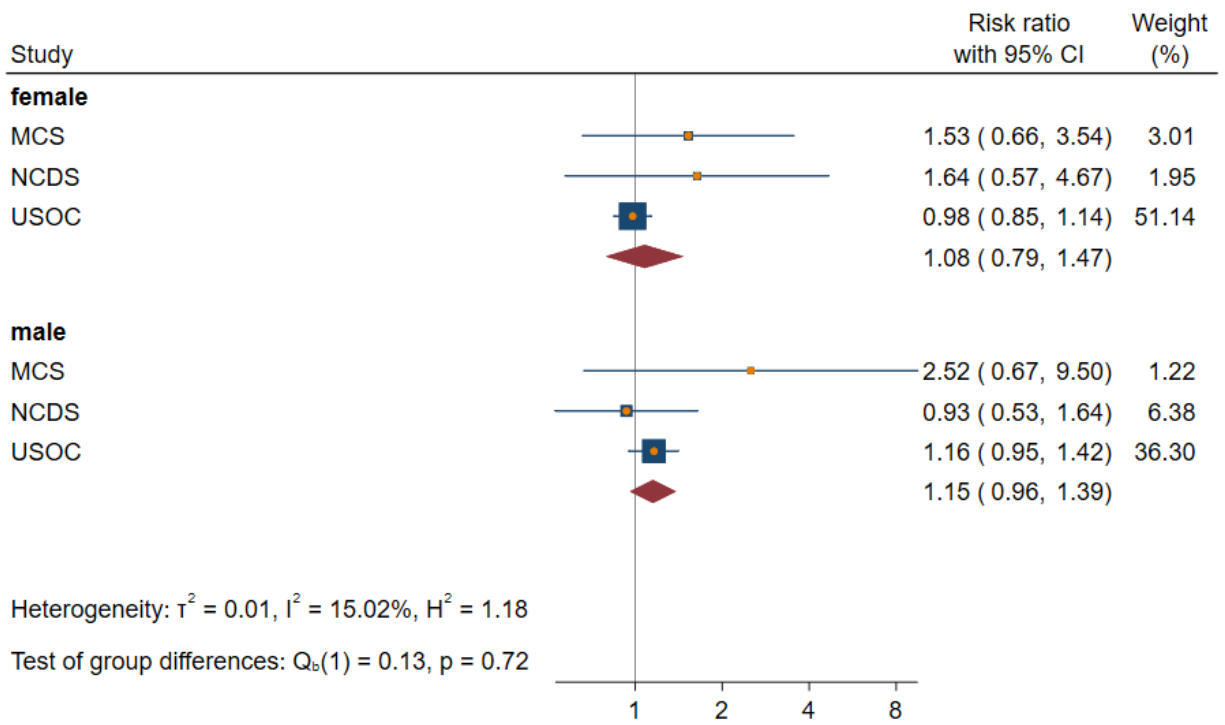



## Figure set 32: Increased alcohol consumption

Increased alcohol consumption  
Furloughed vs. Stable employed

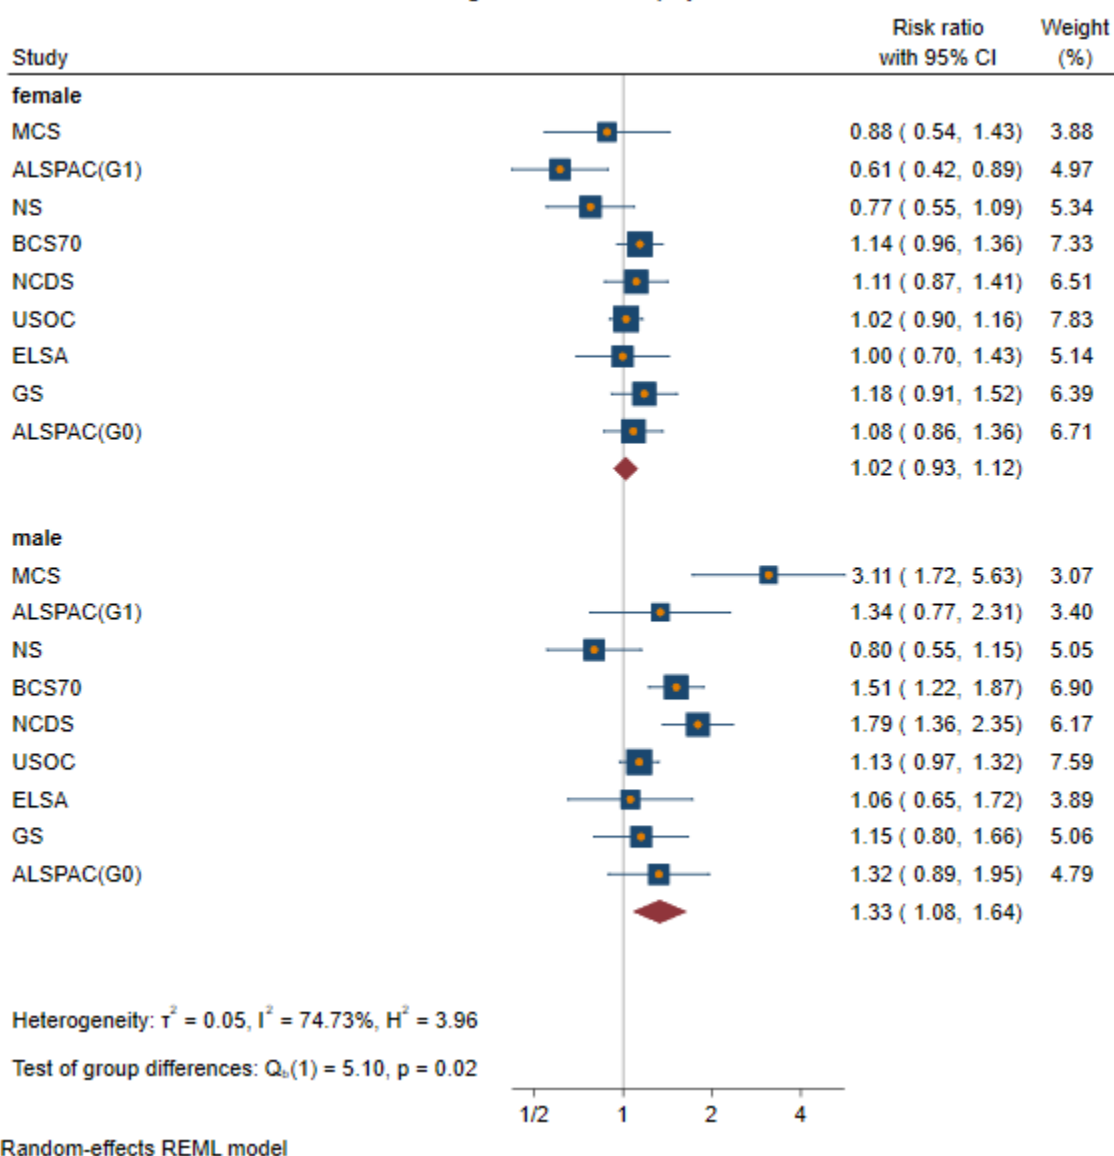

Increased alcohol consumption  
No longer employed vs. Stable employed

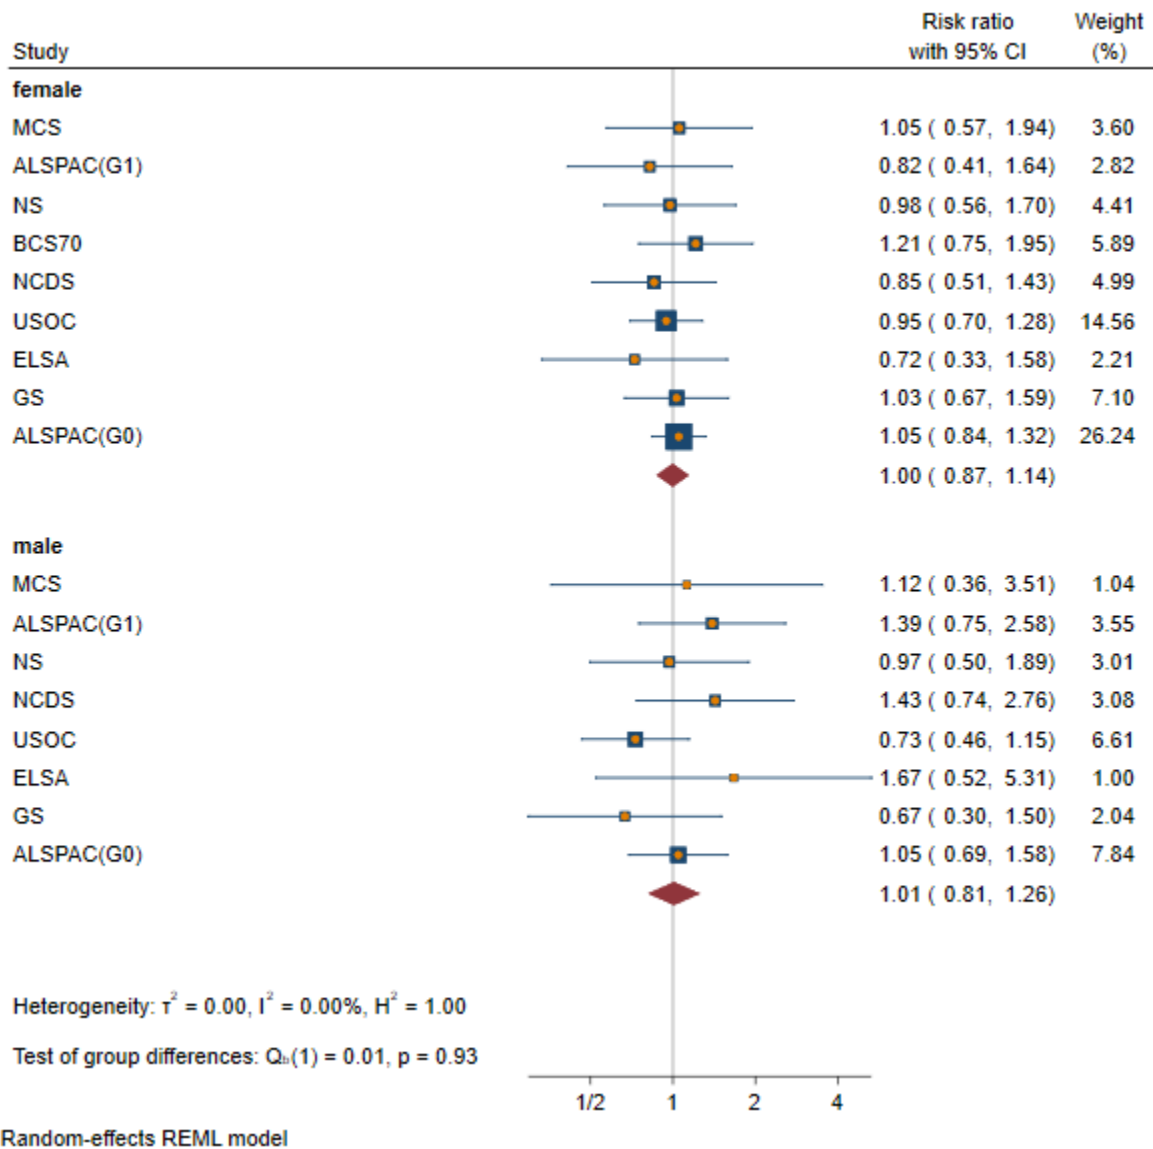

Increased alcohol consumption  
Stable unemployed vs. Stable employed

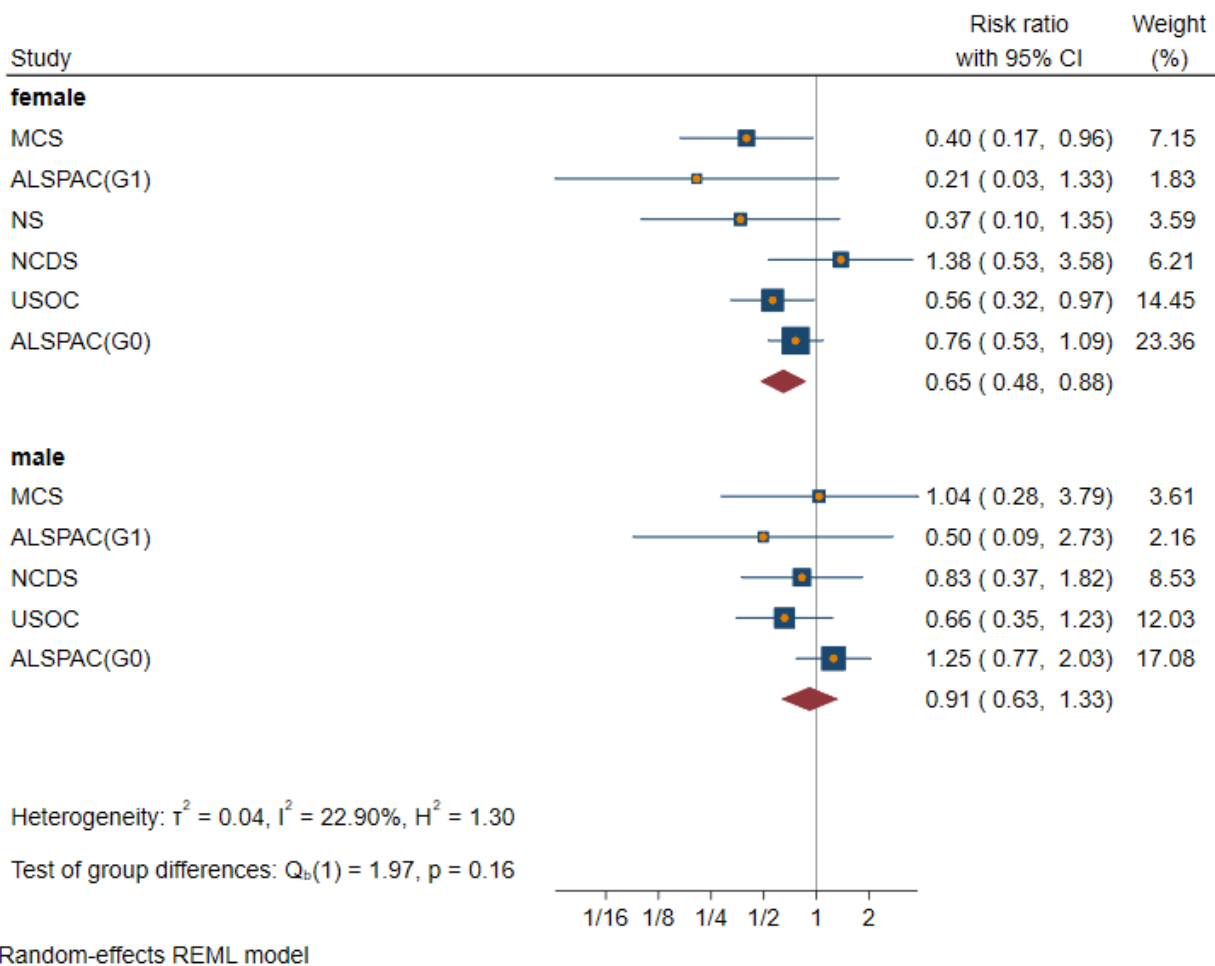

## Figure set 33: Reduced alcohol consumption

Reduced alcohol consumption  
Furloughed vs. Stable employed

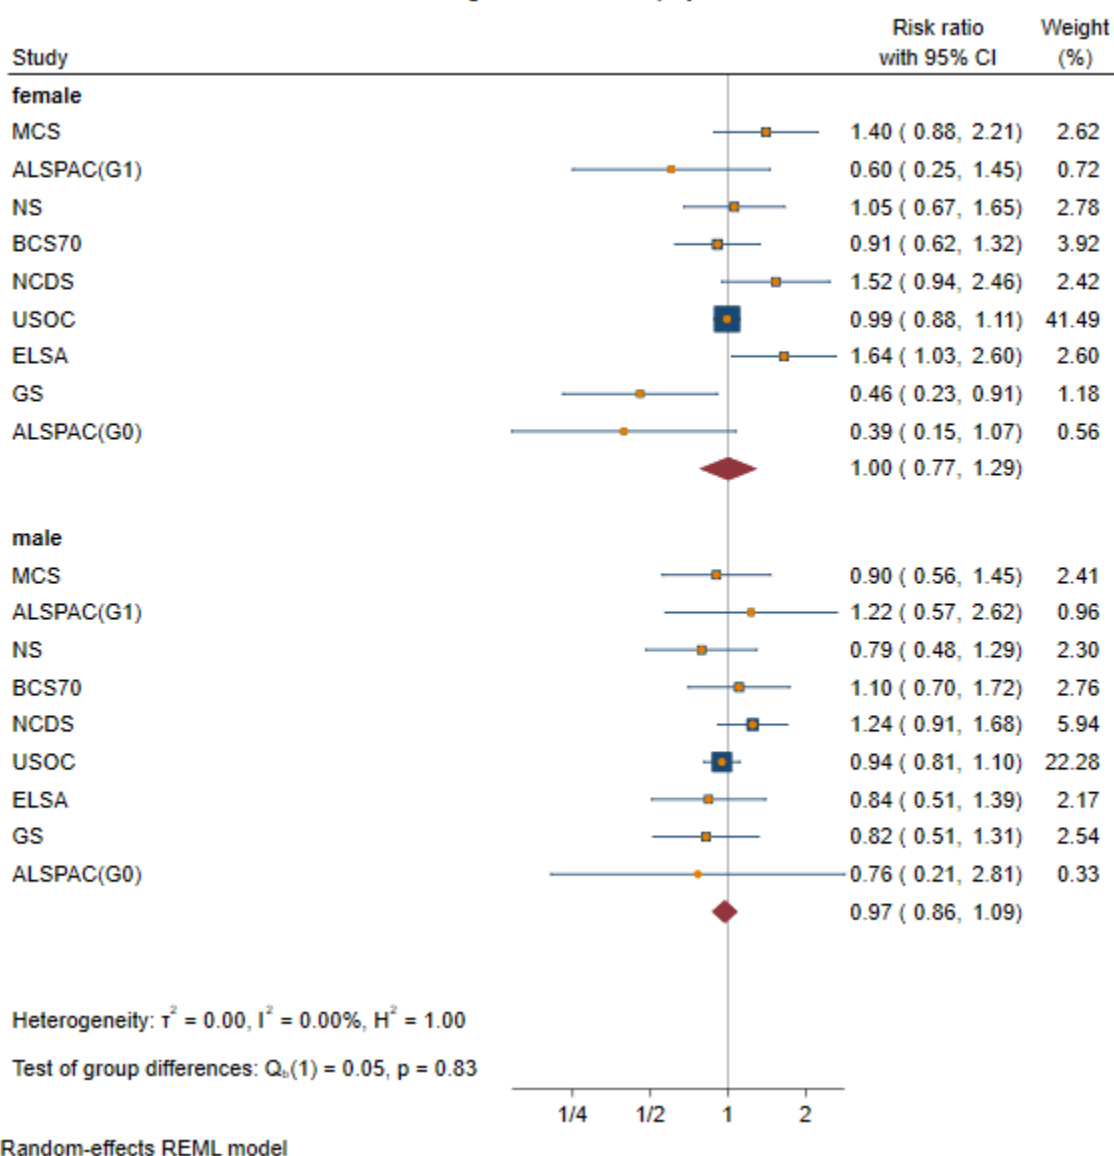

Reduced alcohol consumption  
No longer employed vs. Stable employed

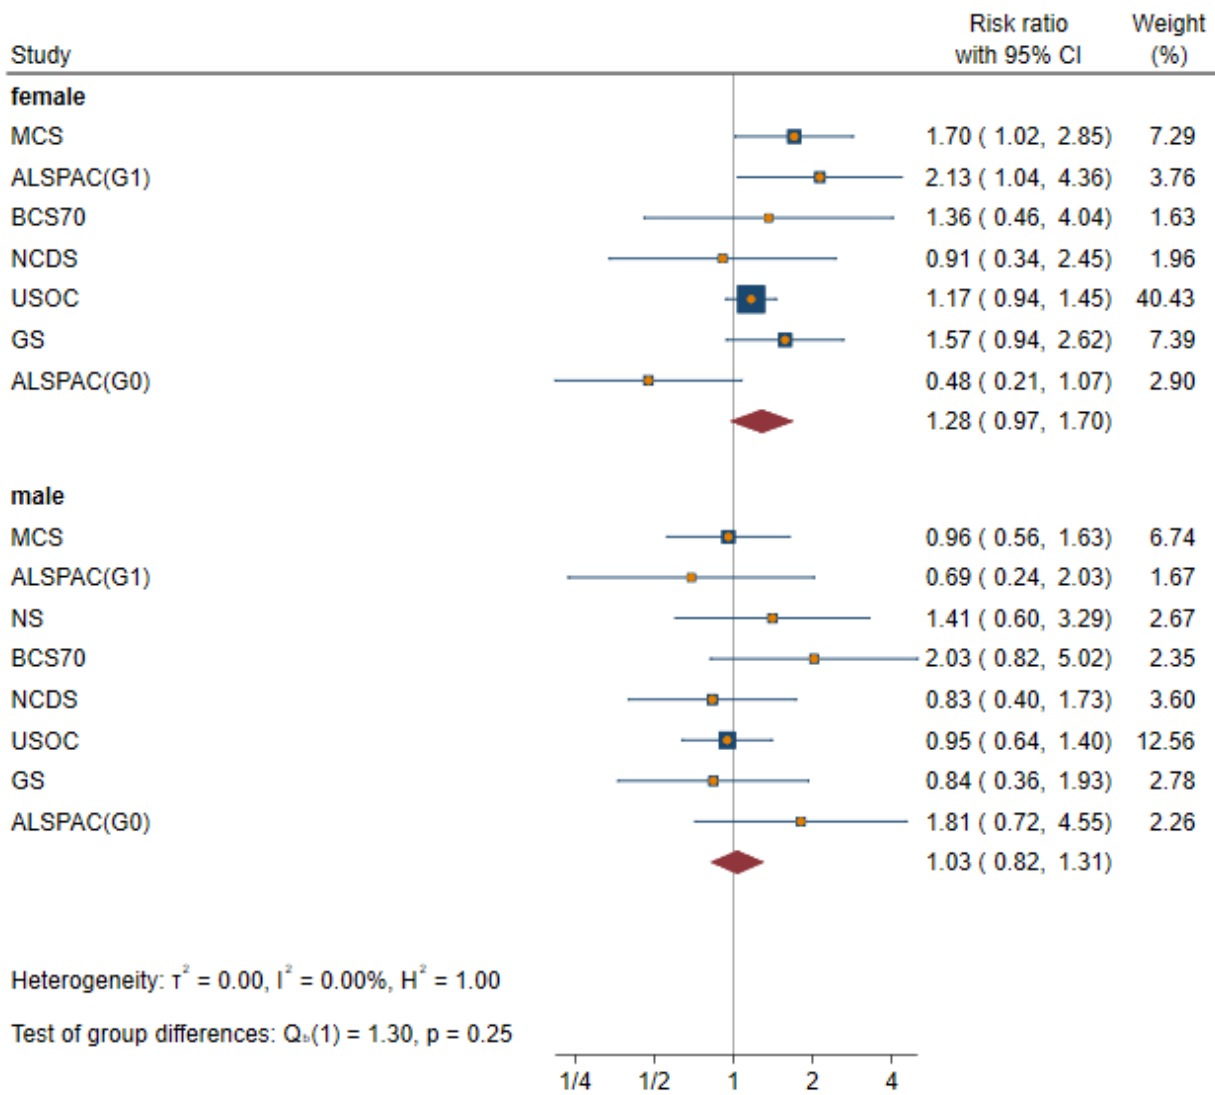

Random-effects REML model

Reduced alcohol consumption  
Stable unemployed vs. Stable employed

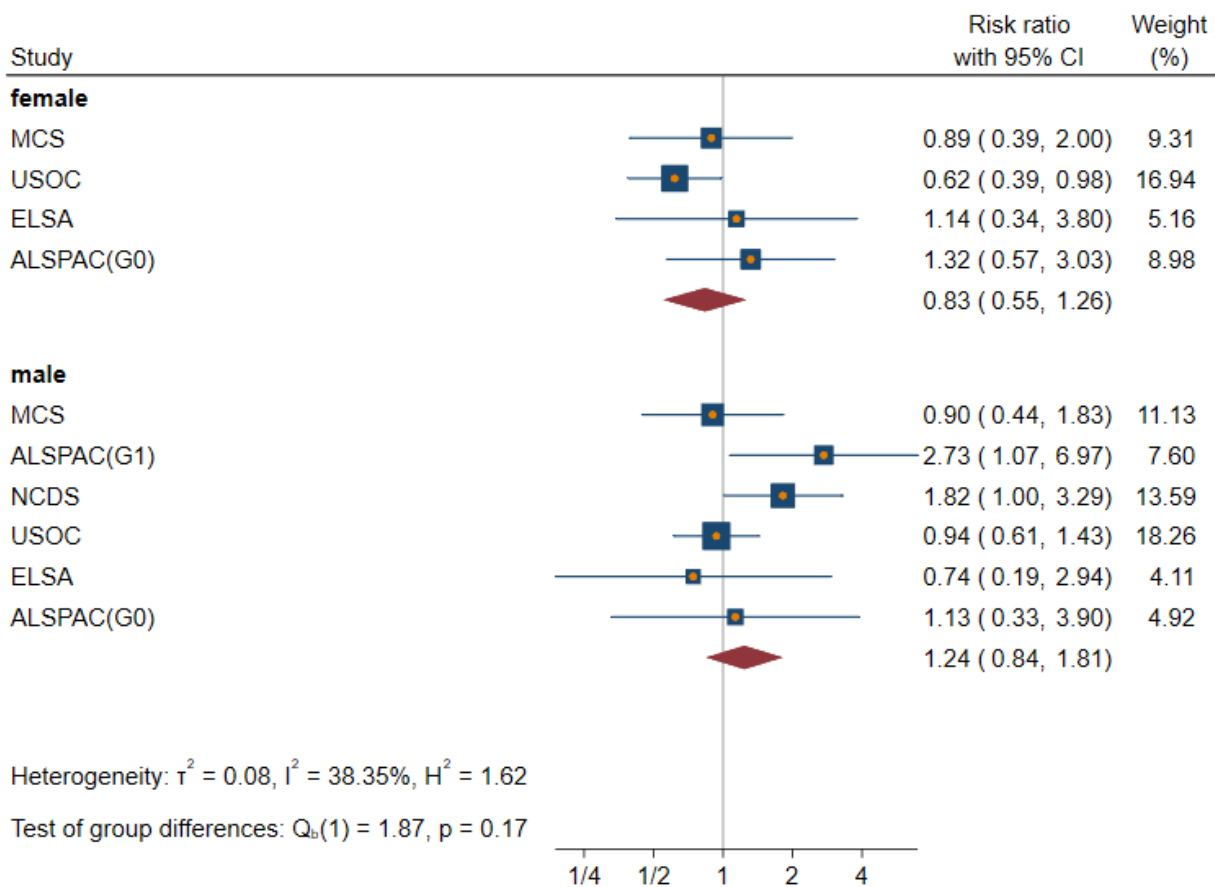

Random-effects REML model

## Figure set 34: Currently drinks 5+ drinks/occasion

Currently drinks 5+ drinks/occasion  
Furloughed vs. Stable employed

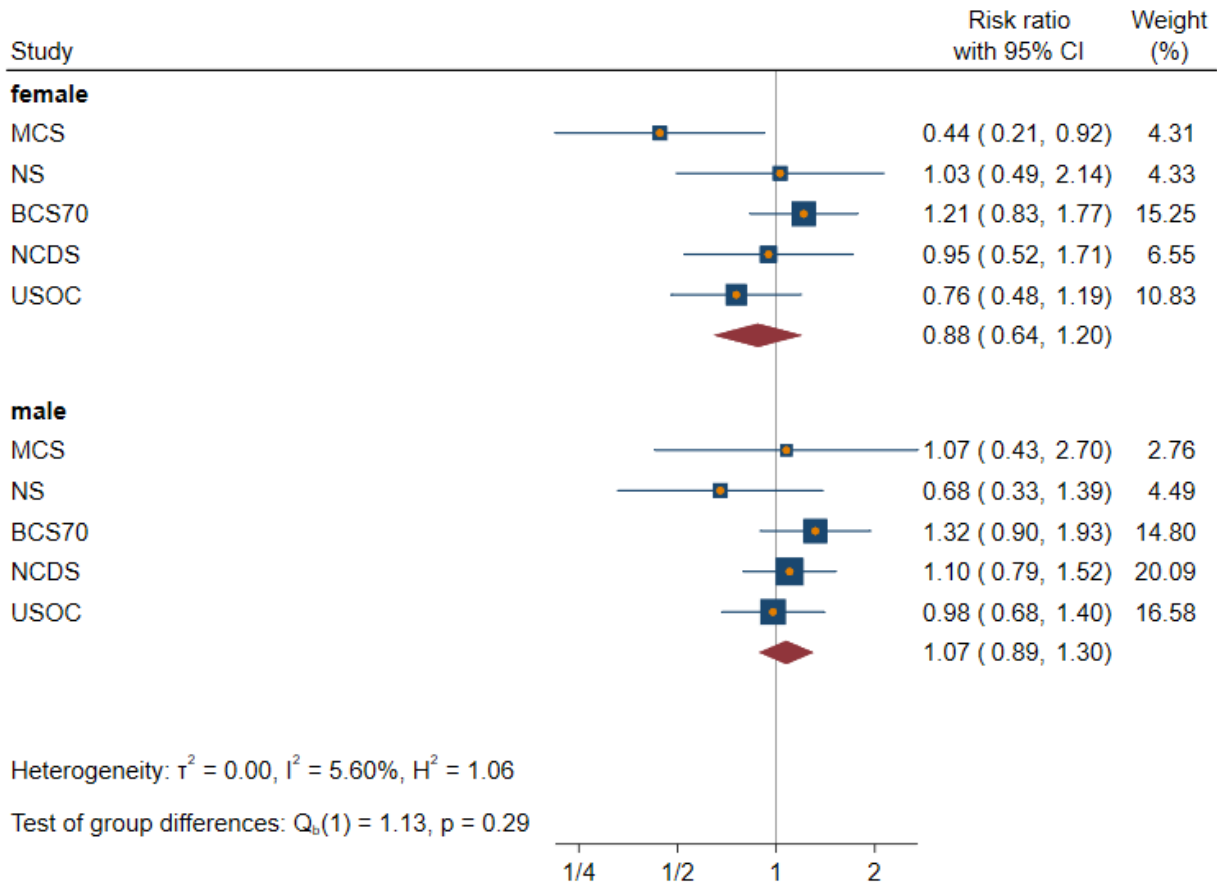

Currently drinks 5+ drinks/occasion  
No longer employed vs. Stable employed

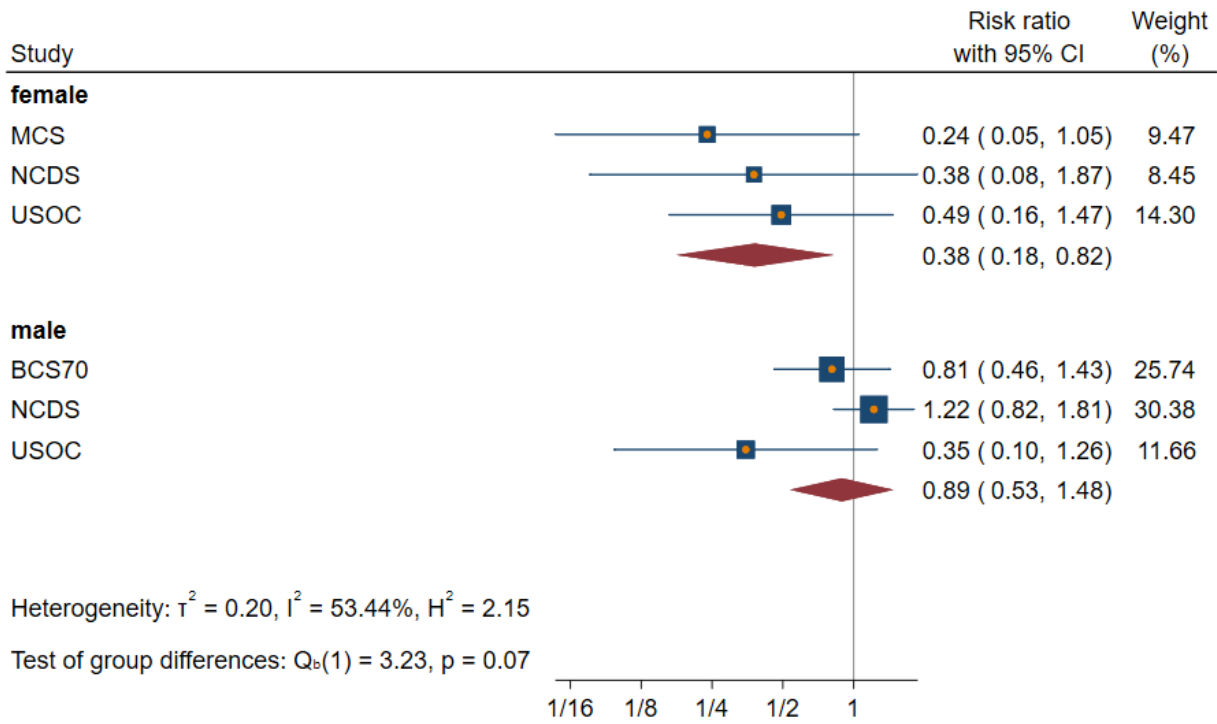

Currently drinks 5+ drinks/occasion  
Stable unemployed vs. Stable employed

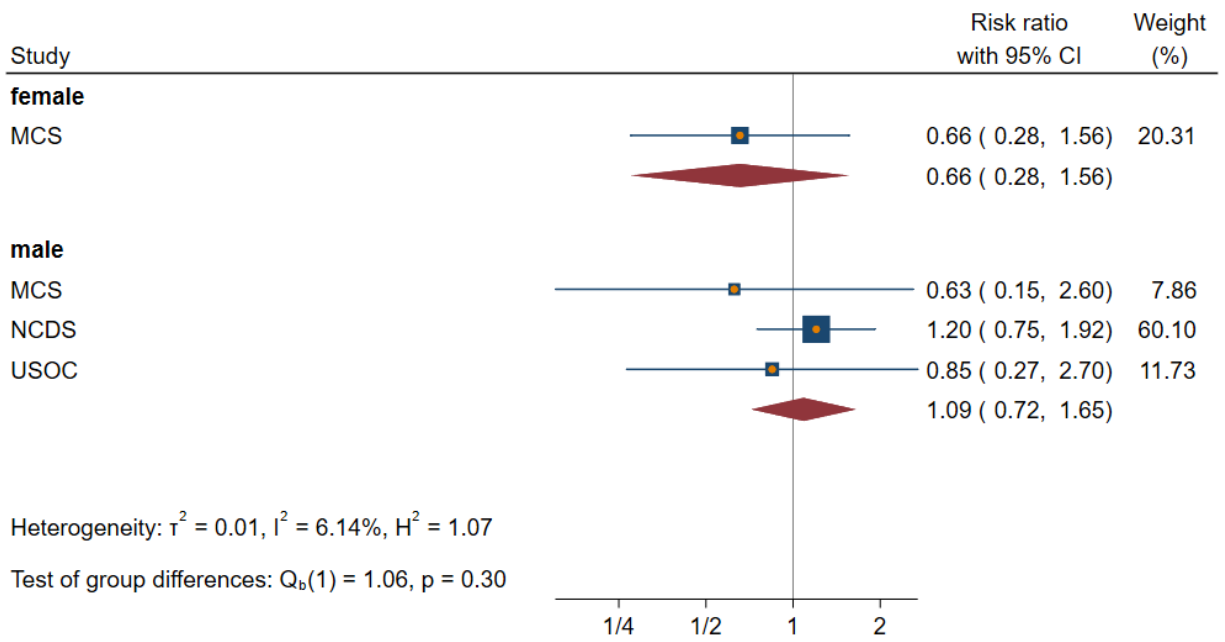

Random-effects REML model

## Figure set 35: Drinks more alcohol units per occasion

Drinks more alcohol units per occasion  
Furloughed vs. Stable employed

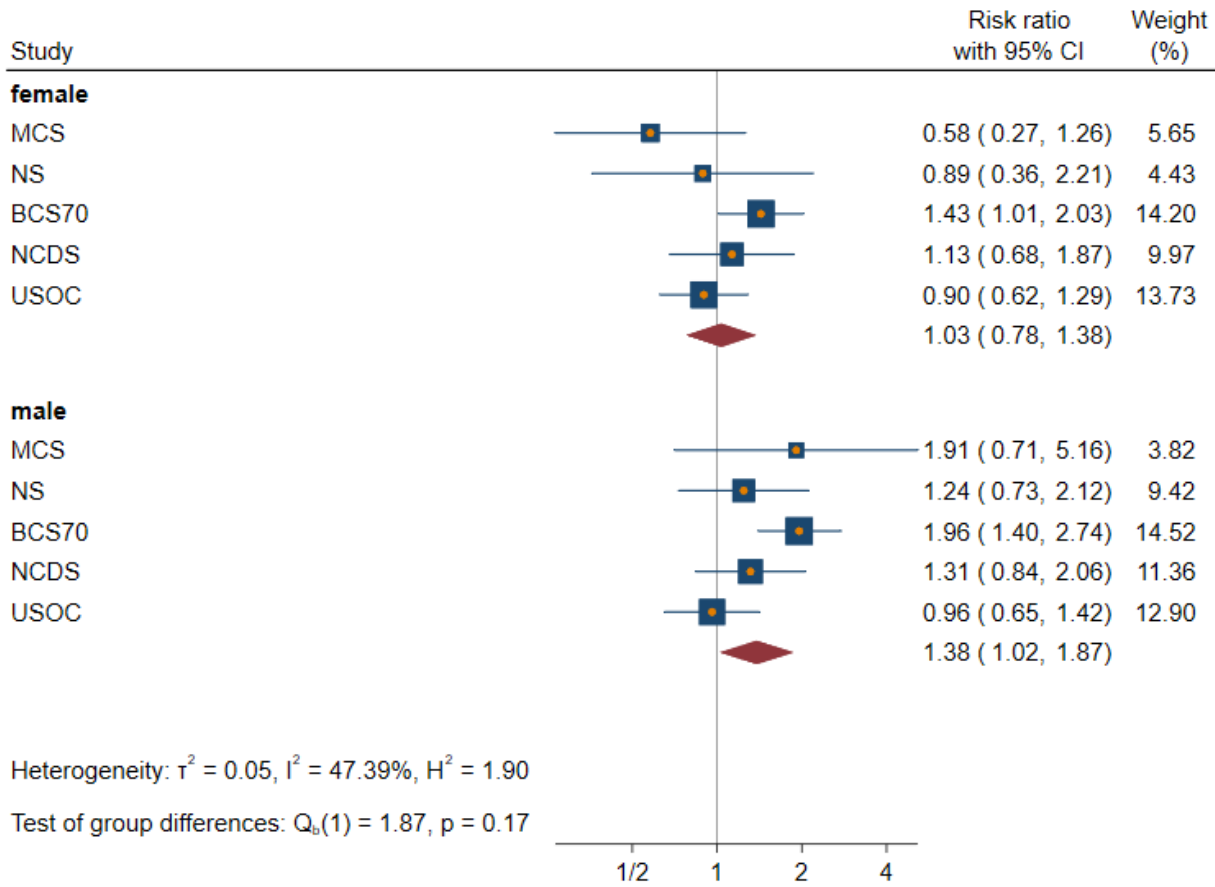

Drinks more alcohol units per occasion  
No longer employed vs. Stable employed

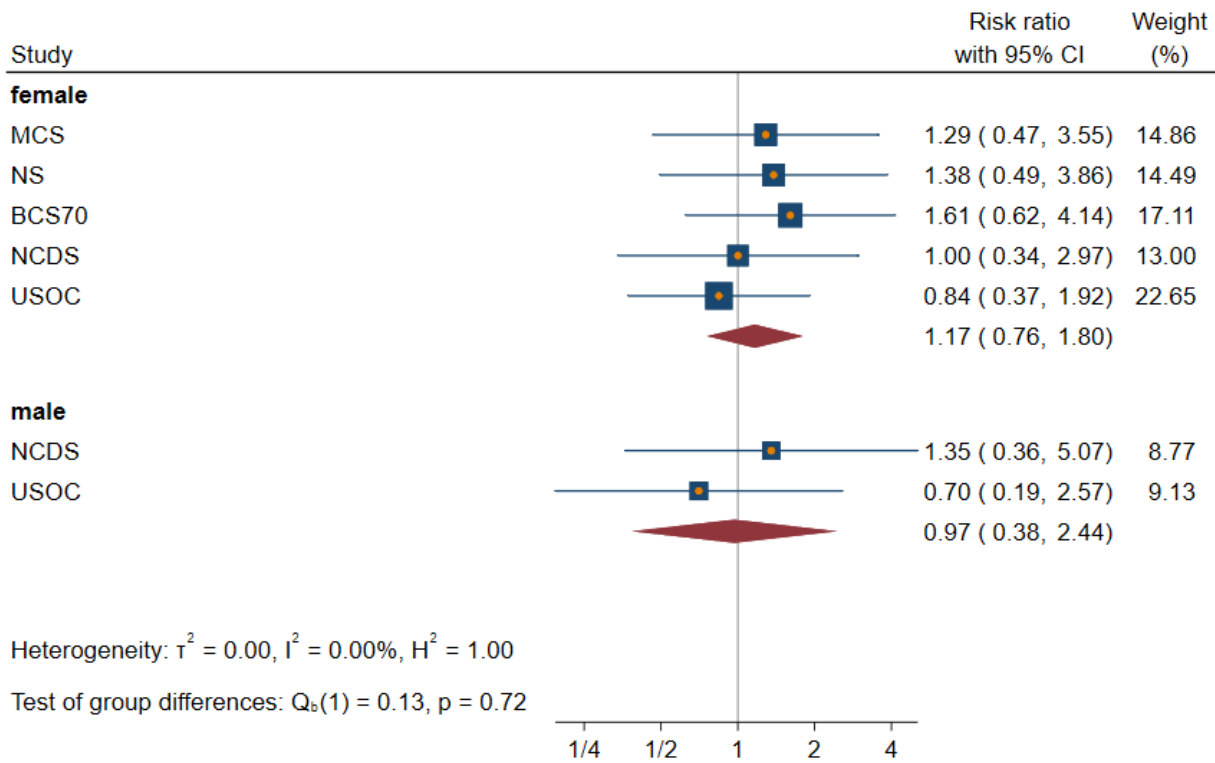

Drinks more alcohol units per occasion  
Stable unemployed vs. Stable employed

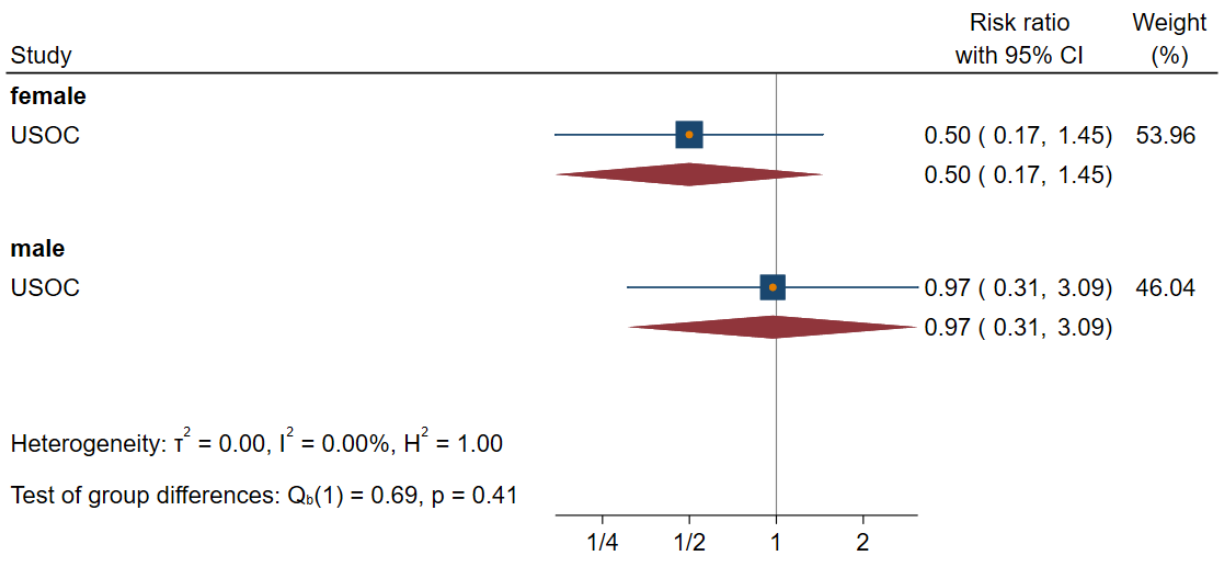

Random-effects REML model



### Figure set 36: Drinks fewer alcohol units per occasion

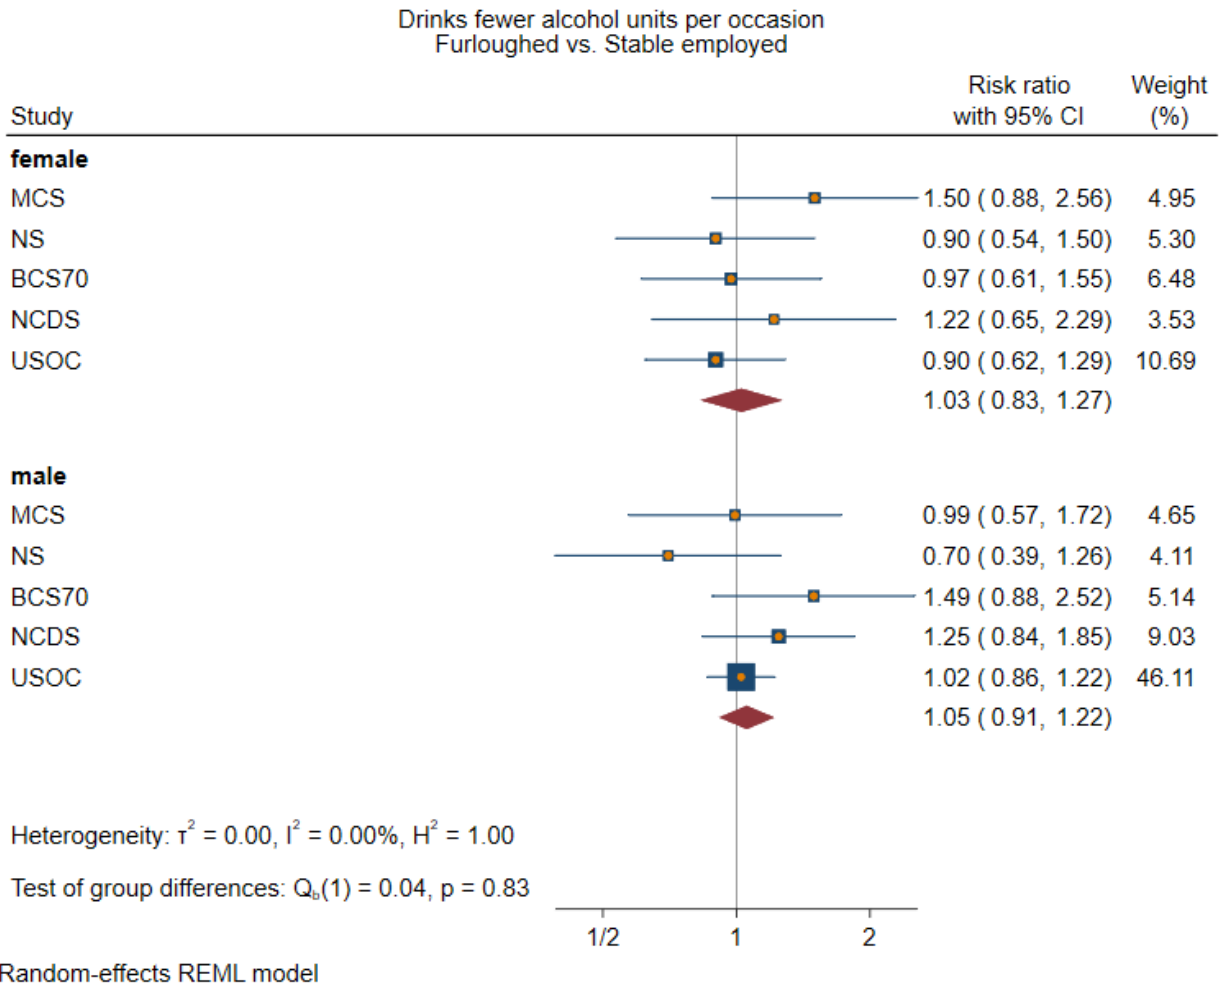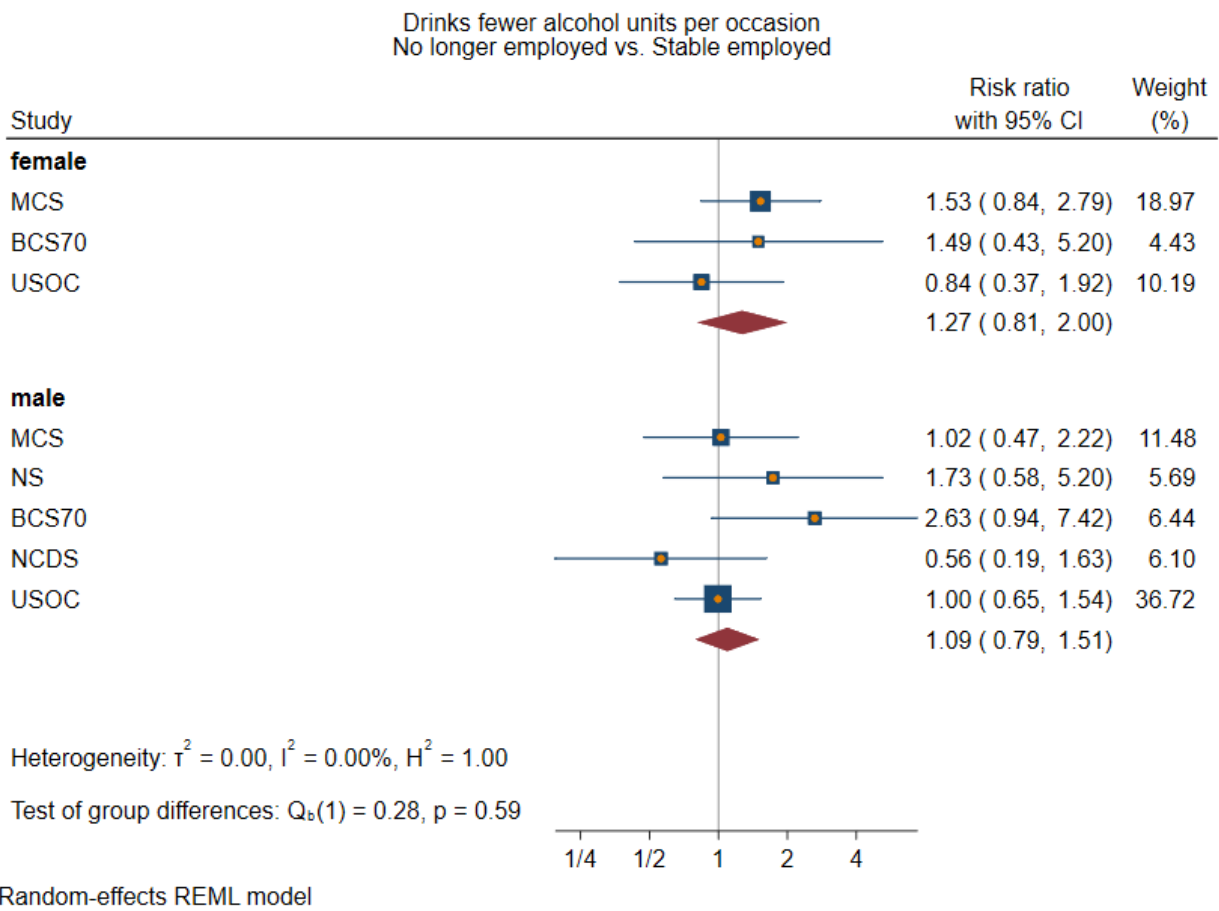

Drinks fewer alcohol units per occasion  
Stable unemployed vs. Stable employed

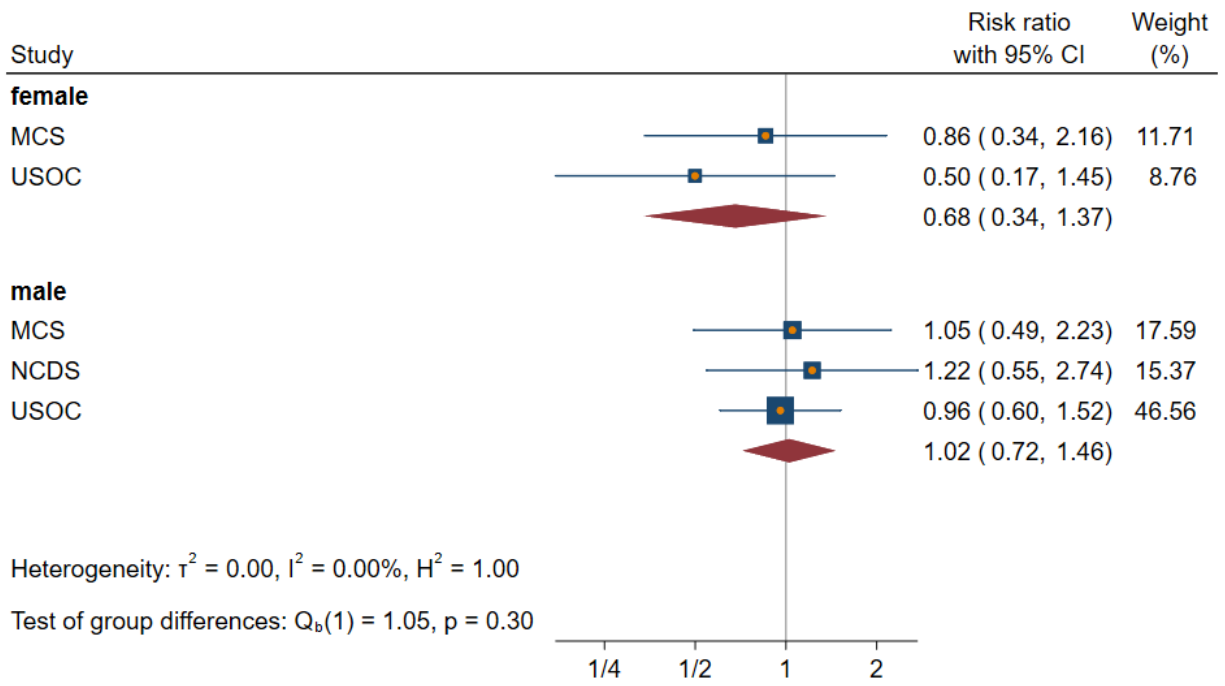

## Figure set 37: Currently drinks 4+ days/week

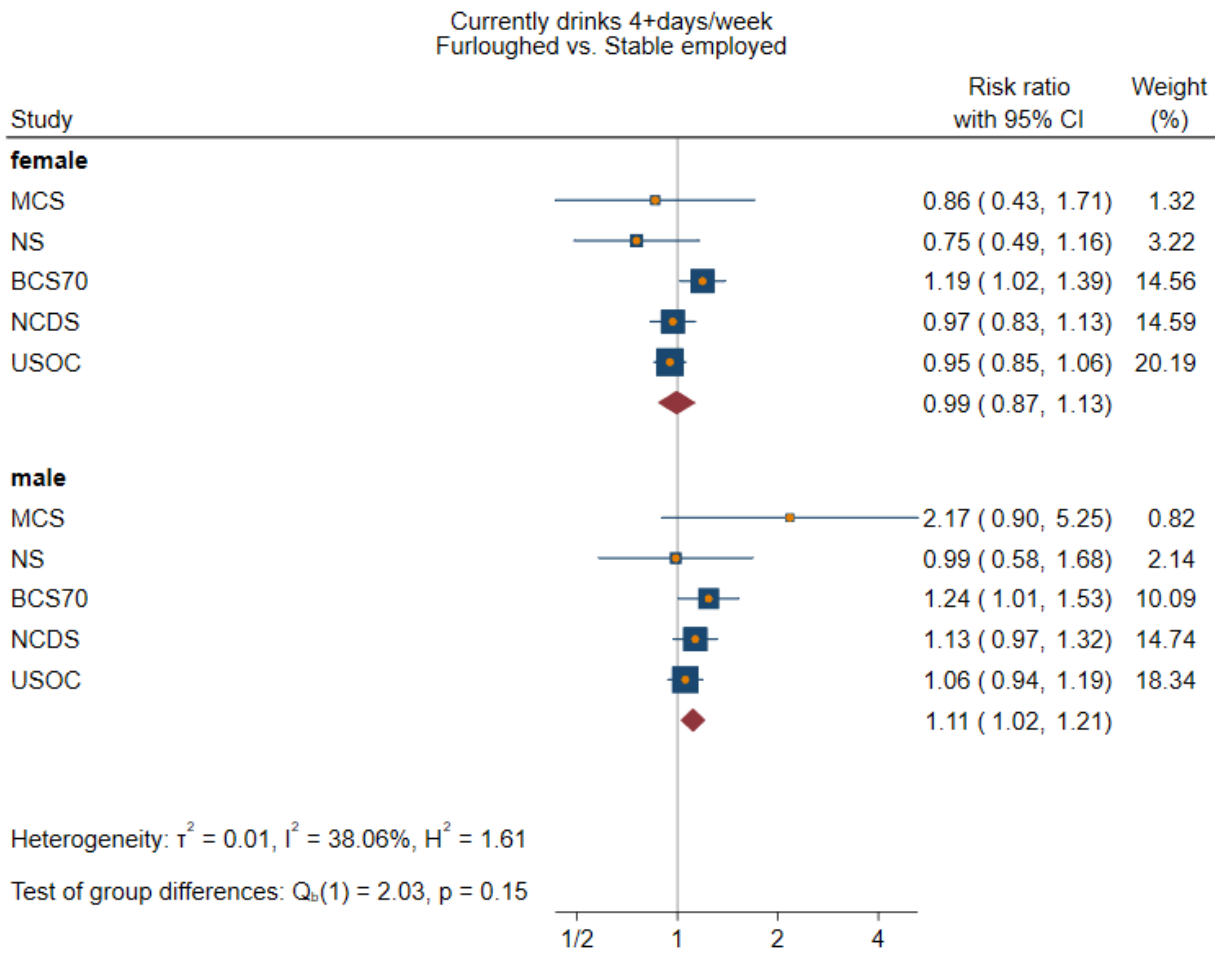

Random-effects REML model

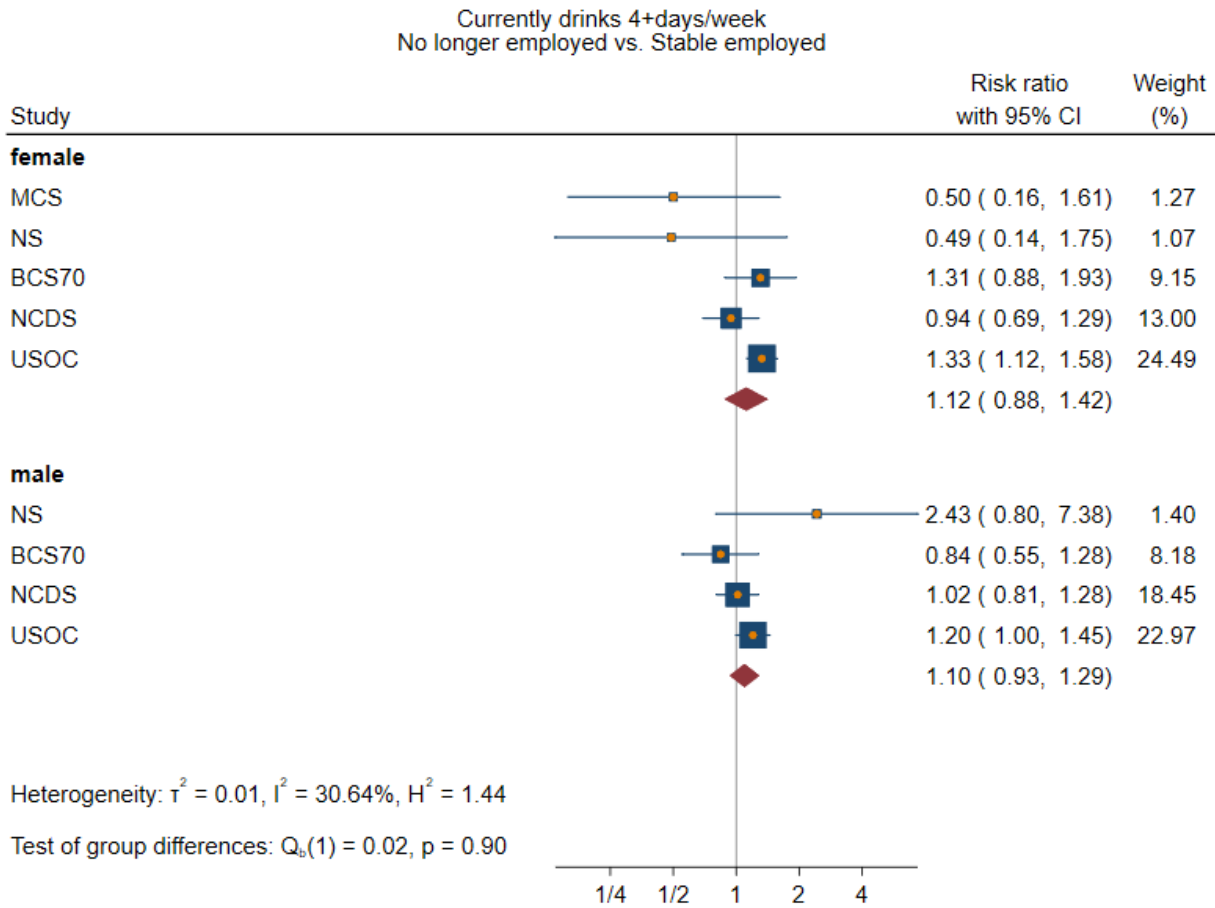

Random-effects REML model

Currently drinks 4+days/week  
Stable unemployed vs. Stable employed

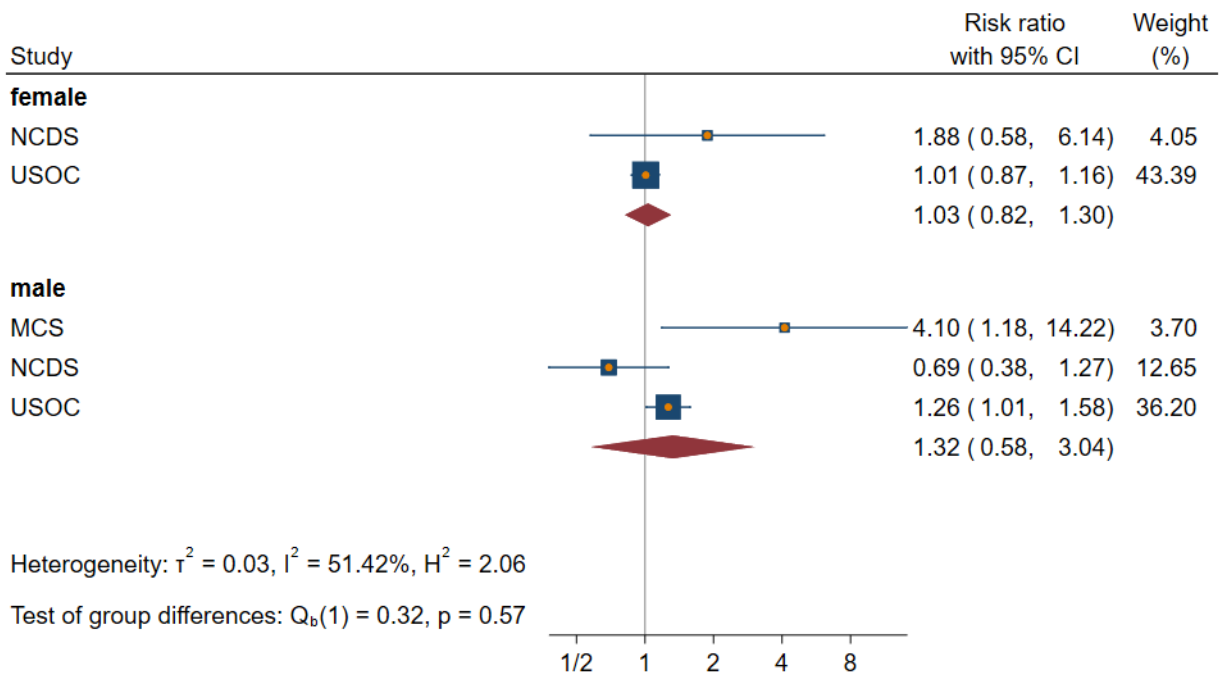

Random-effects REML model

## Figure set 38: Drinks more frequently

Drinks more frequently  
Furloughed vs. Stable employed

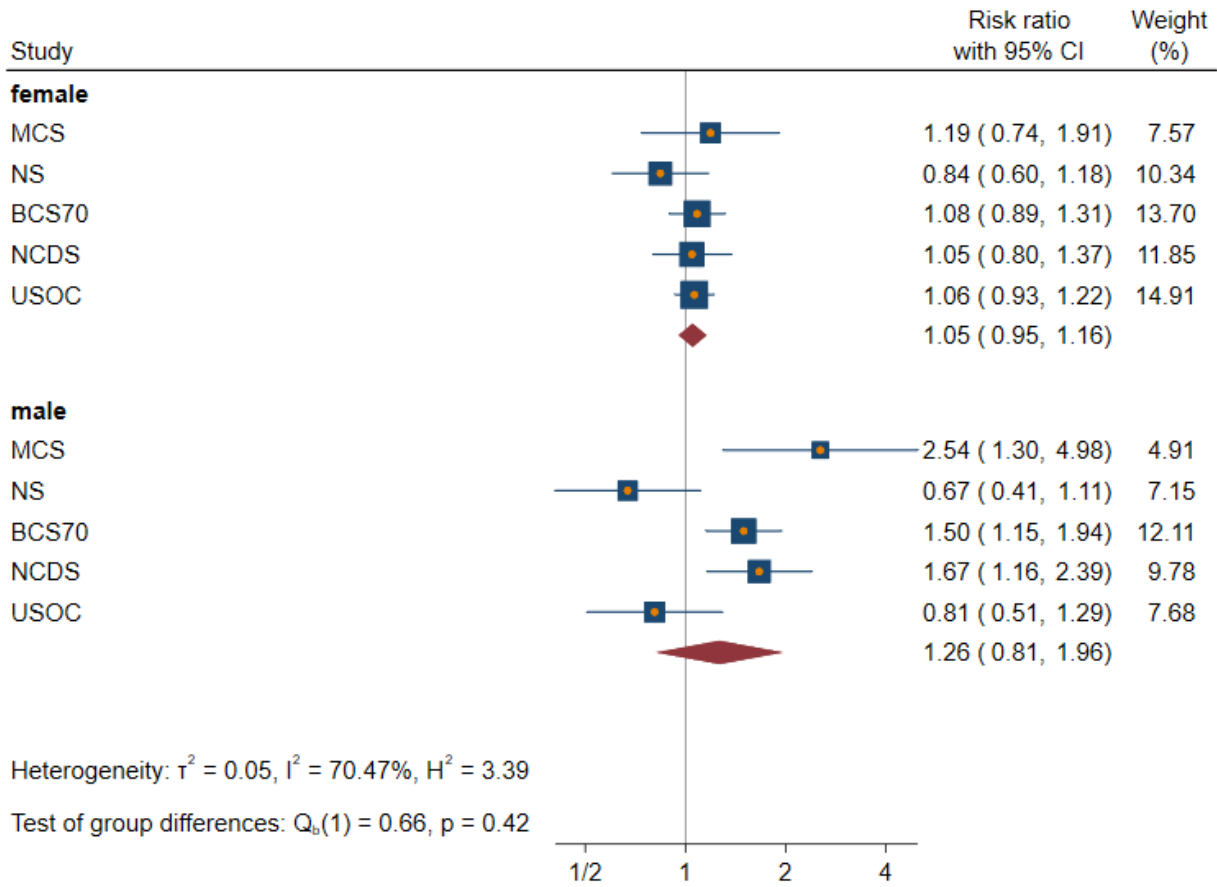

Drinks more frequently  
No longer employed vs. Stable employed

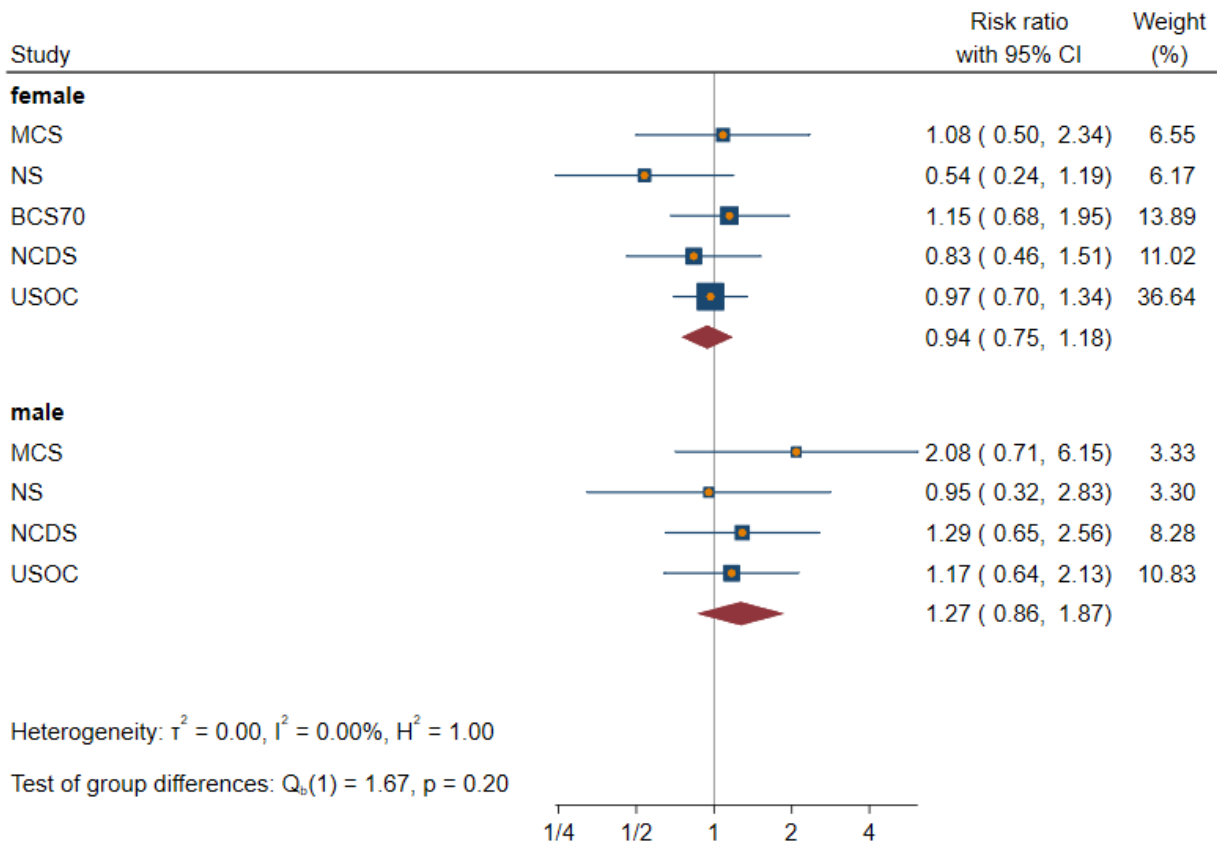

Drinks more frequently  
Stable unemployed vs. Stable employed

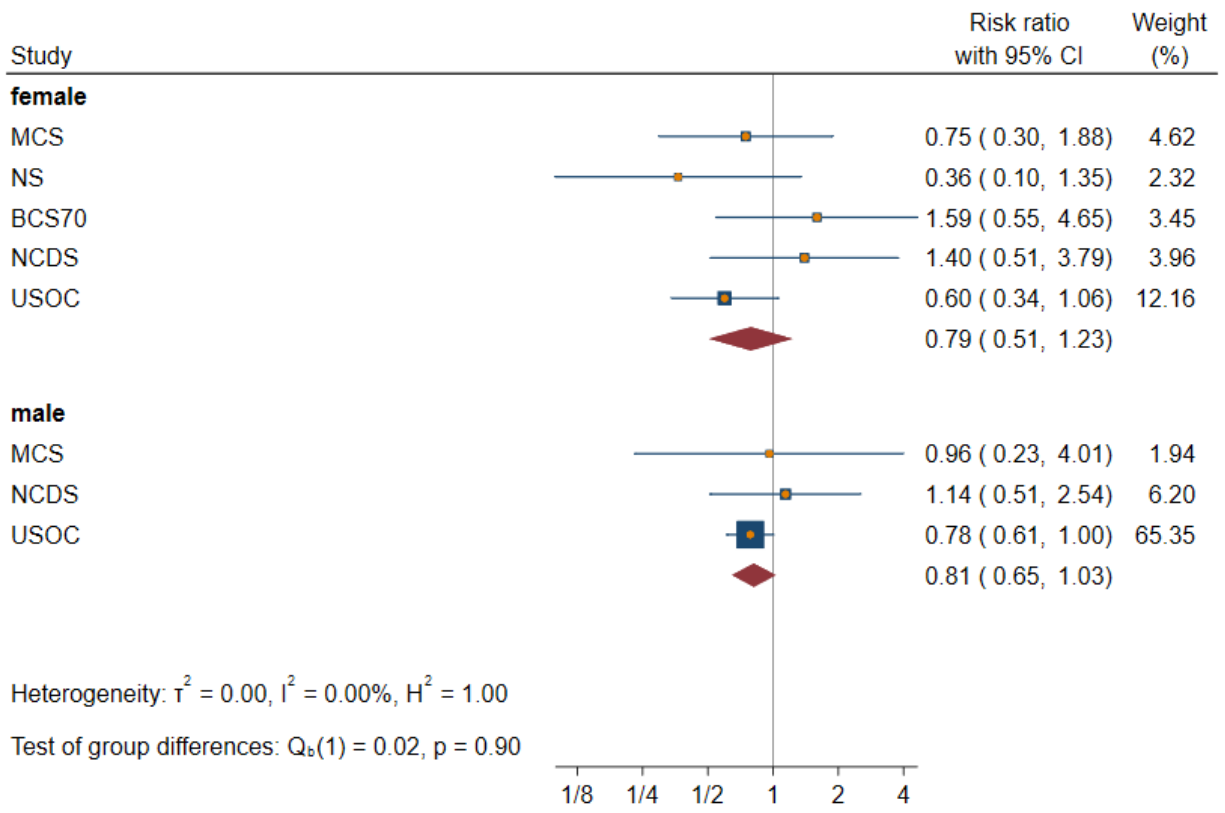

### Figure set 39: Drinks less frequently

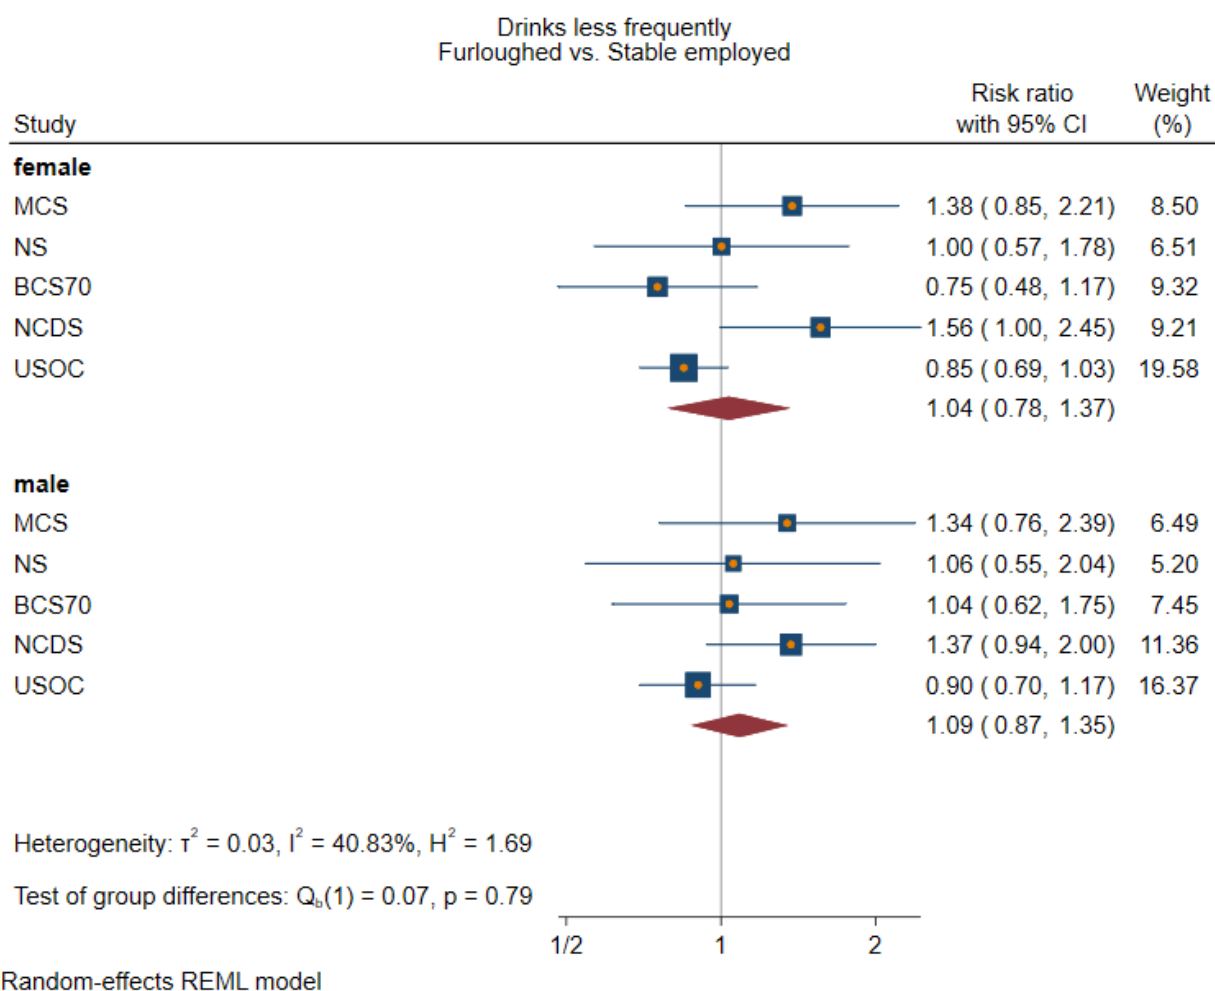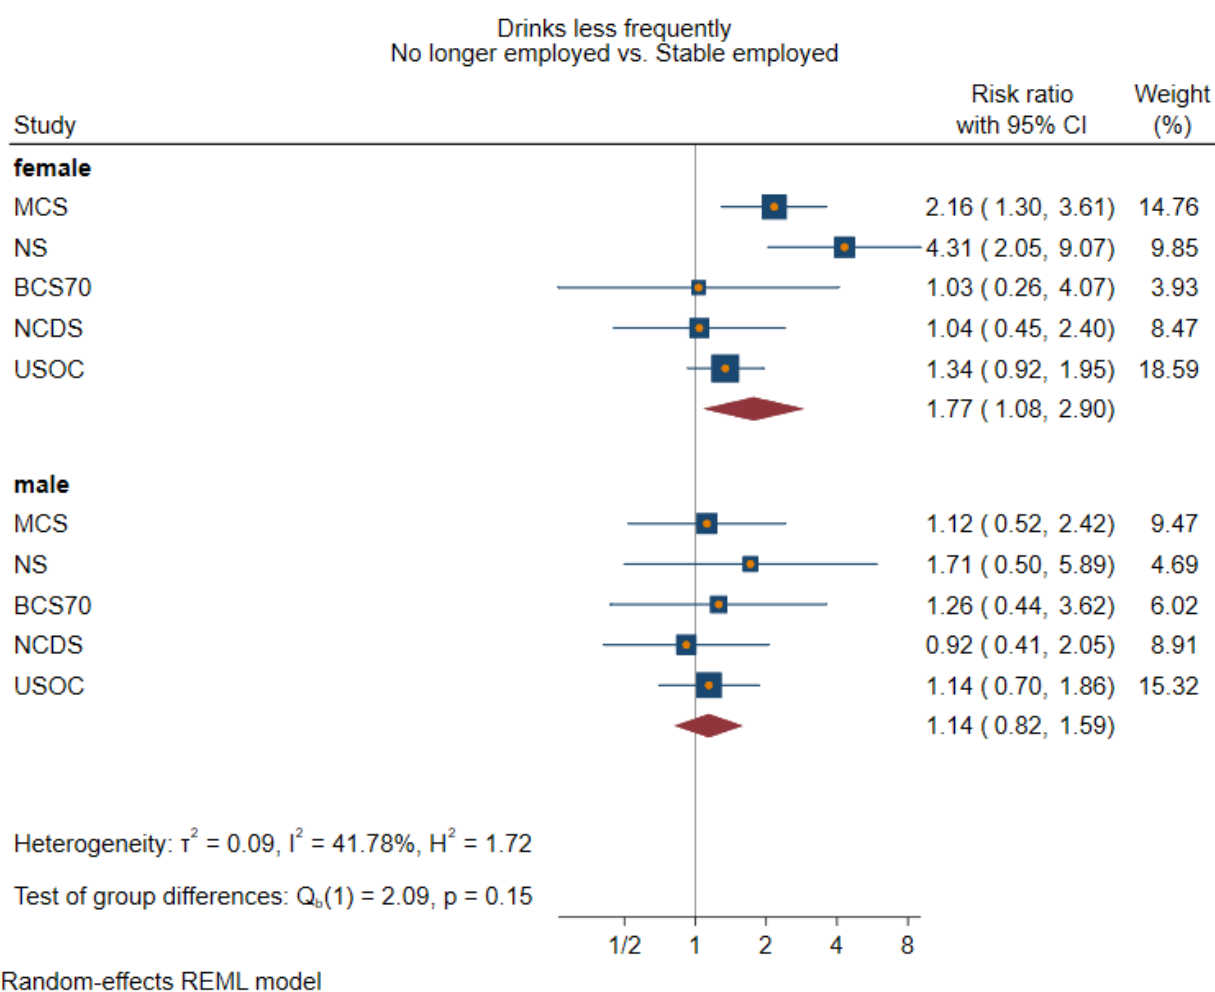

Drinks less frequently  
Stable unemployed vs. Stable employed

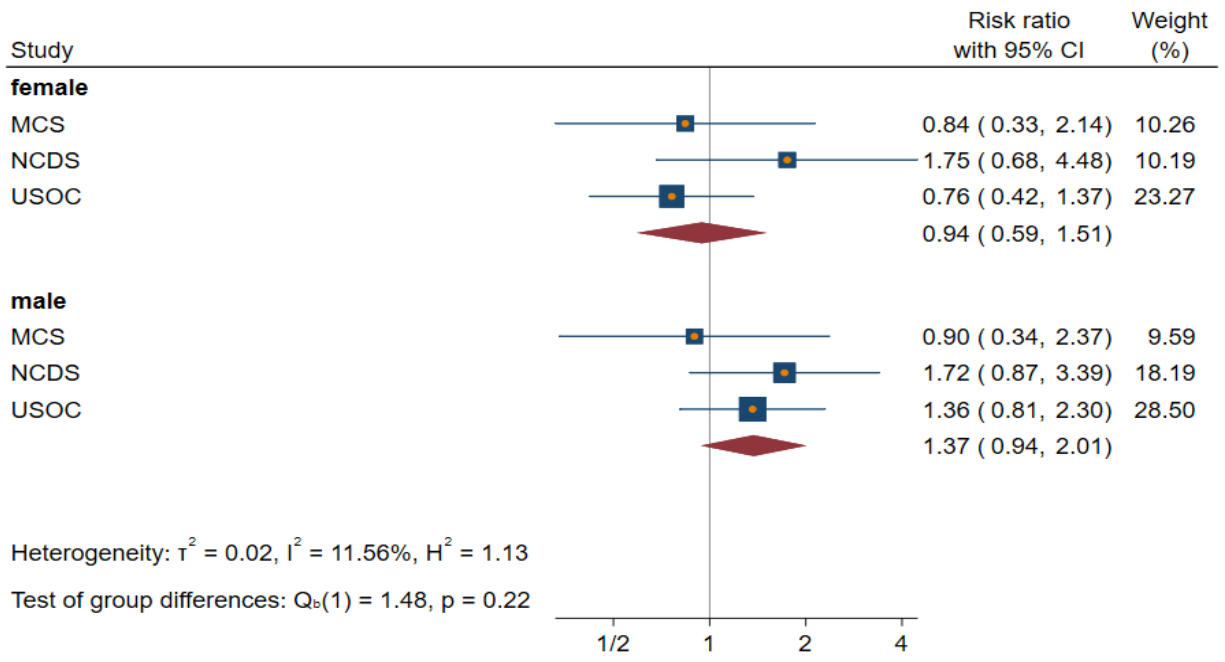



### Figure set 40: Current smoker

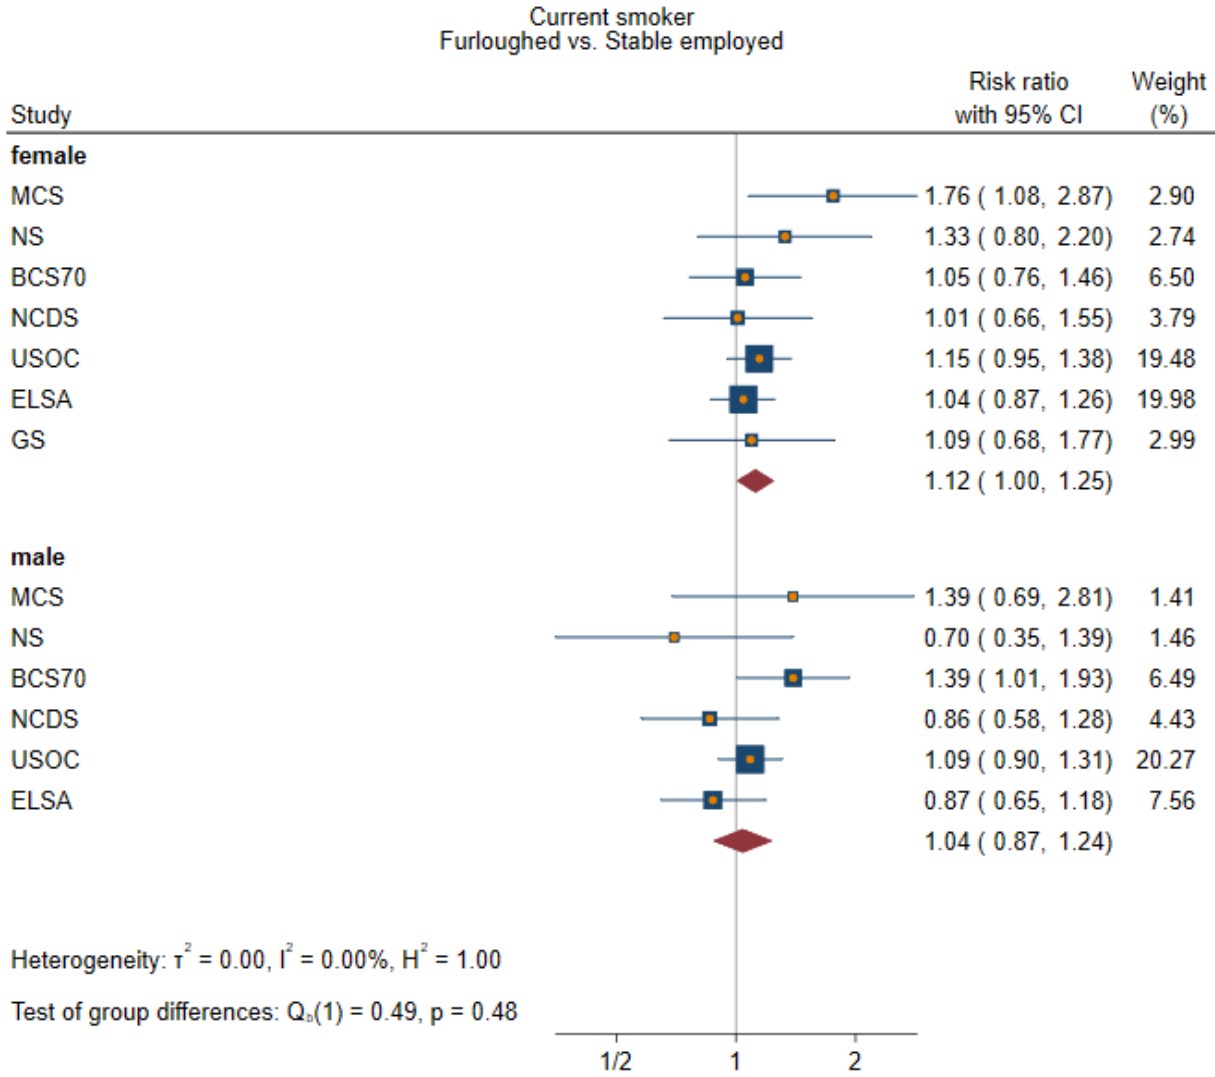

Random-effects REML model

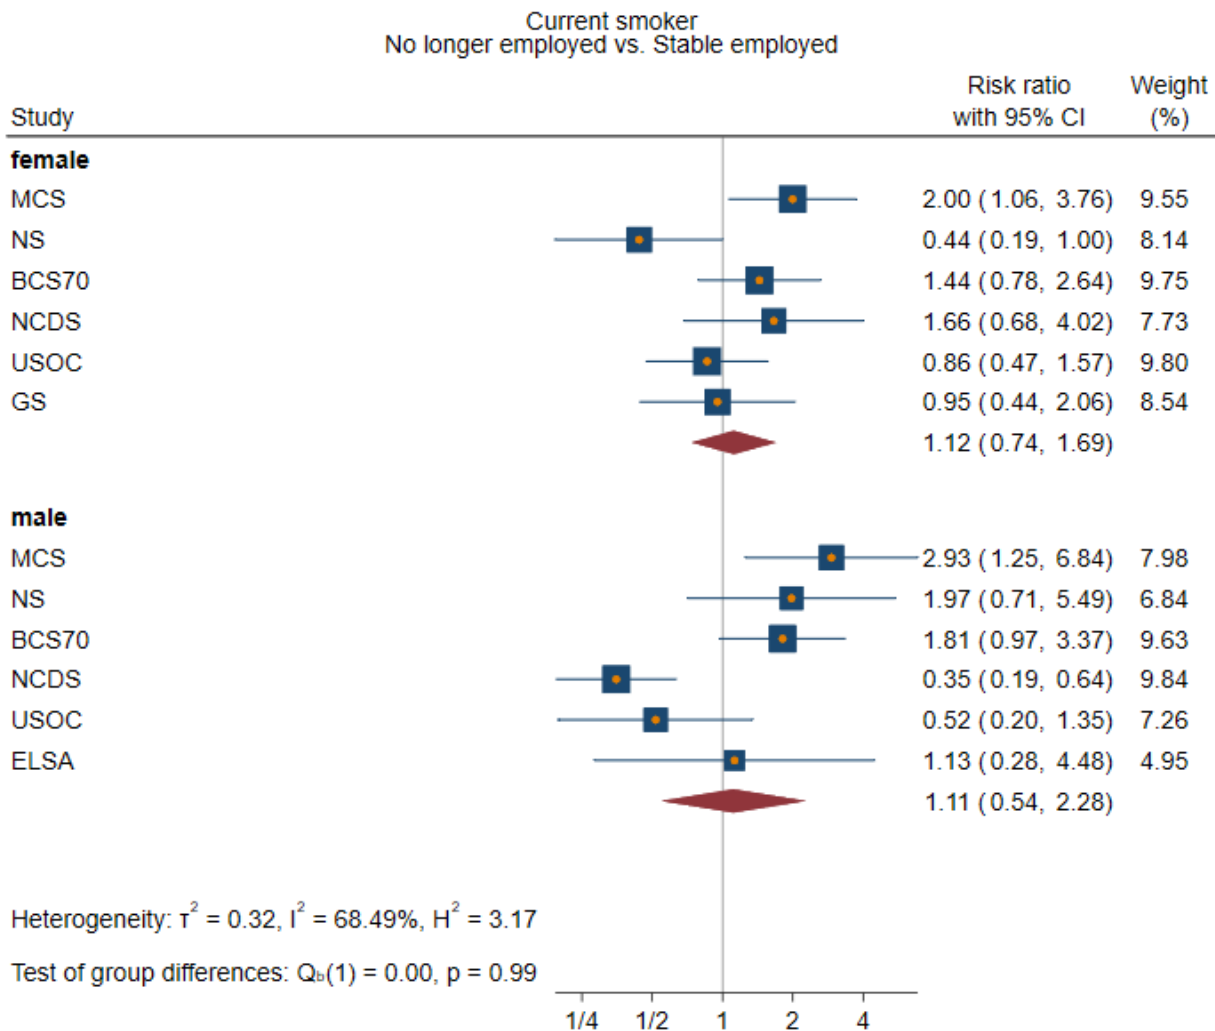

Random-effects REML model

Current smoker  
Stable unemployed vs. Stable employed

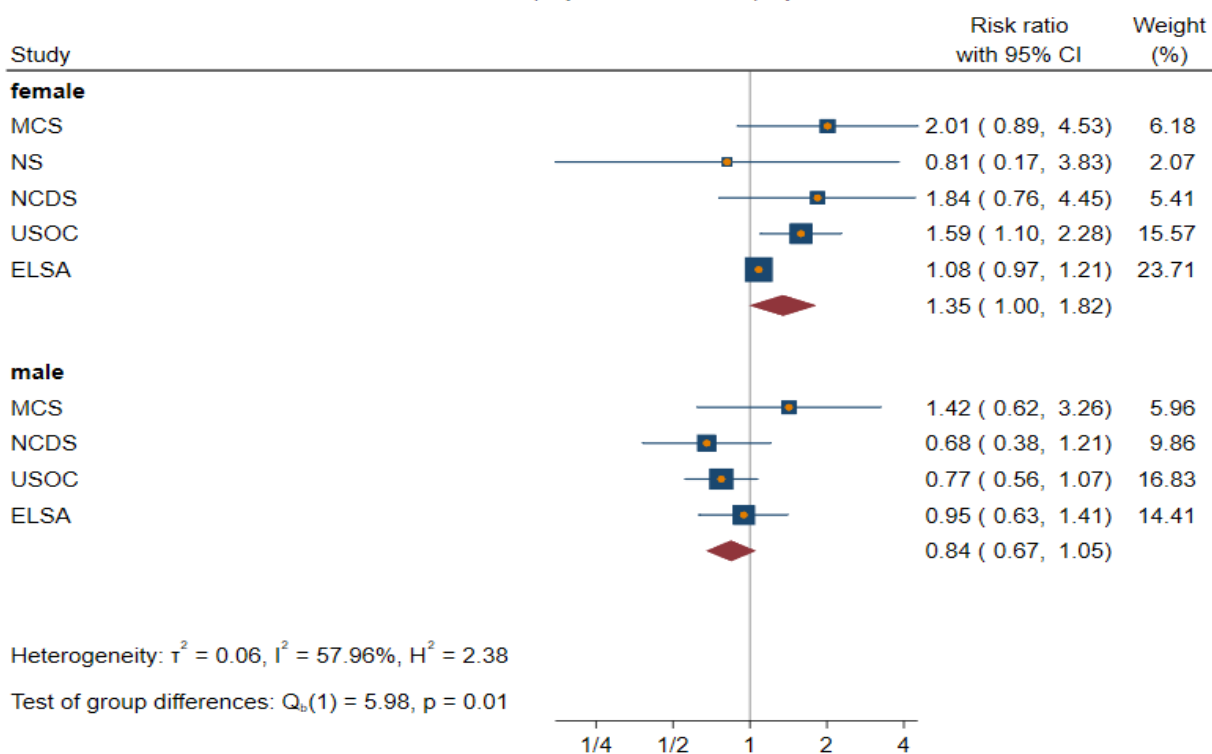

# Figure set 41: Smoking more

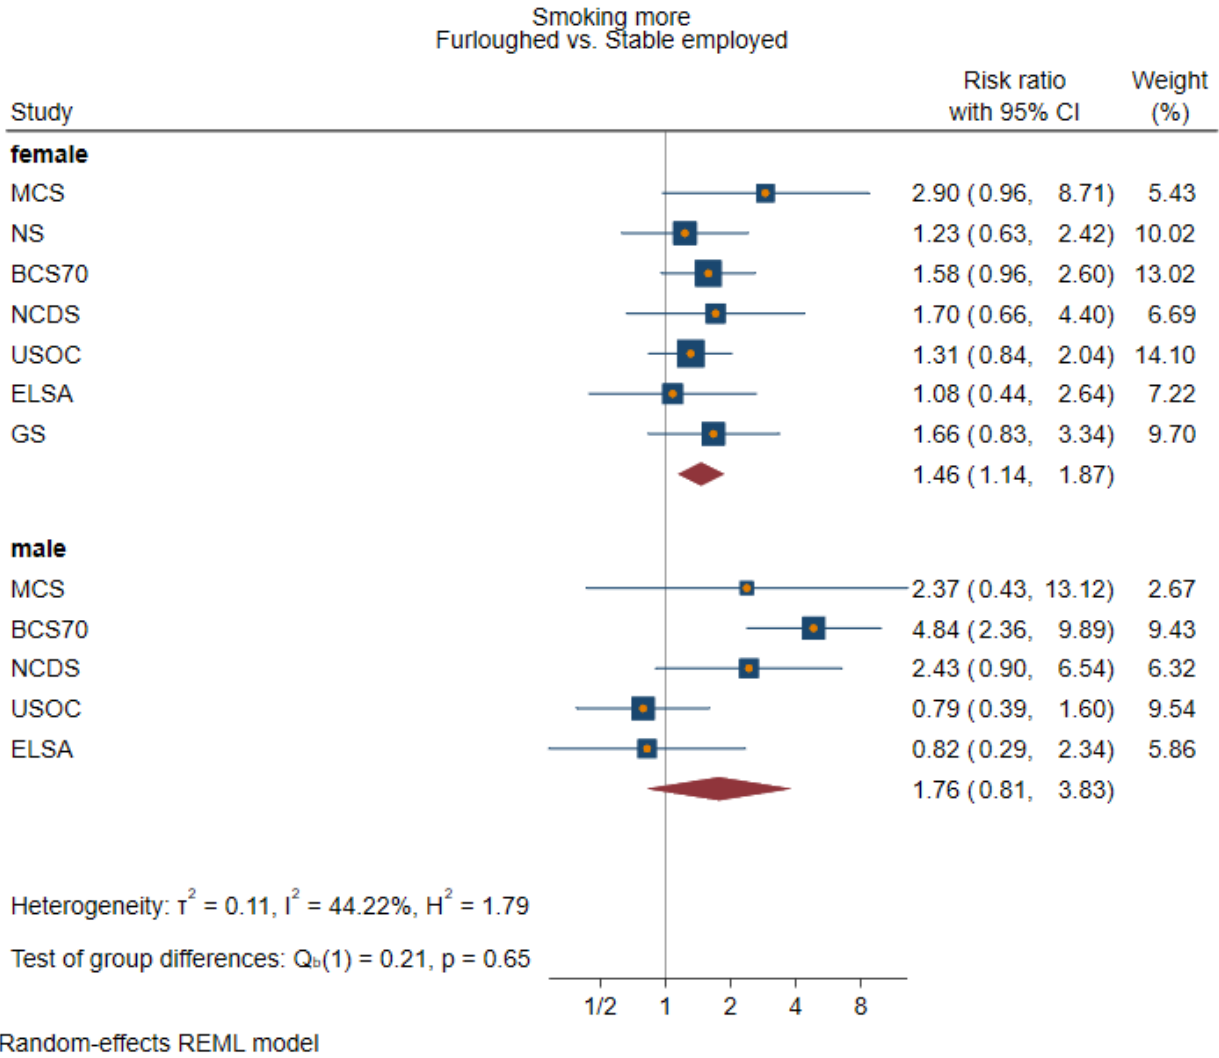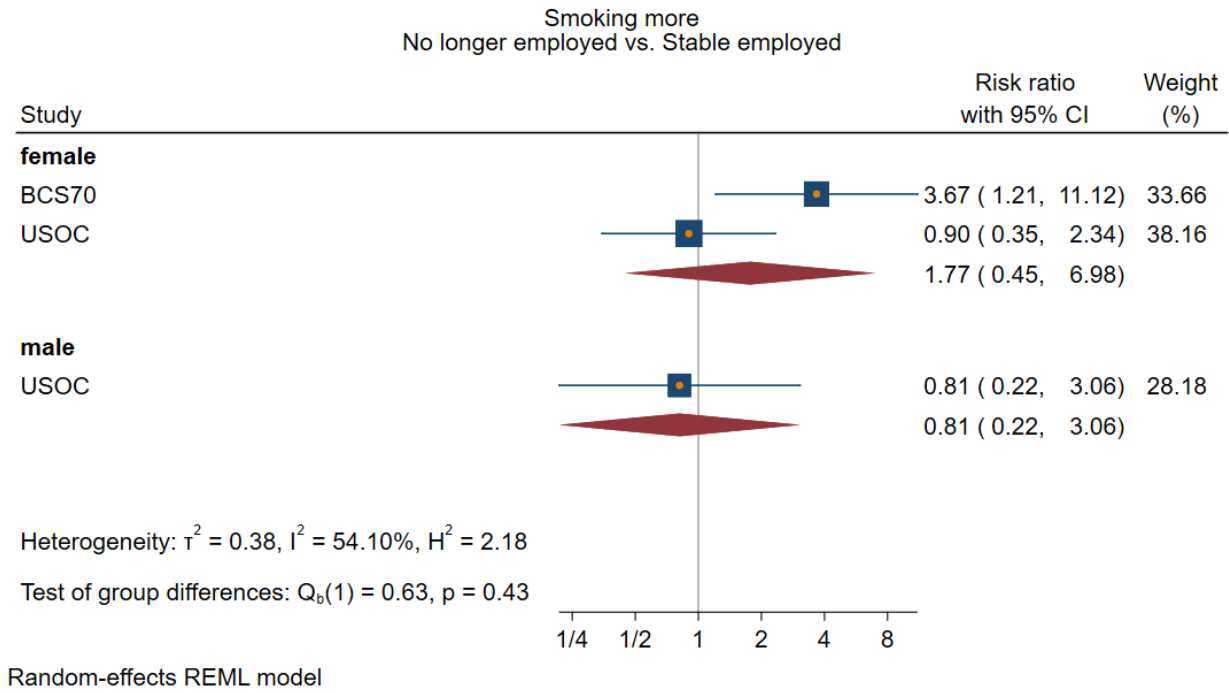

Smoking more  
Stable unemployed vs. Stable employed

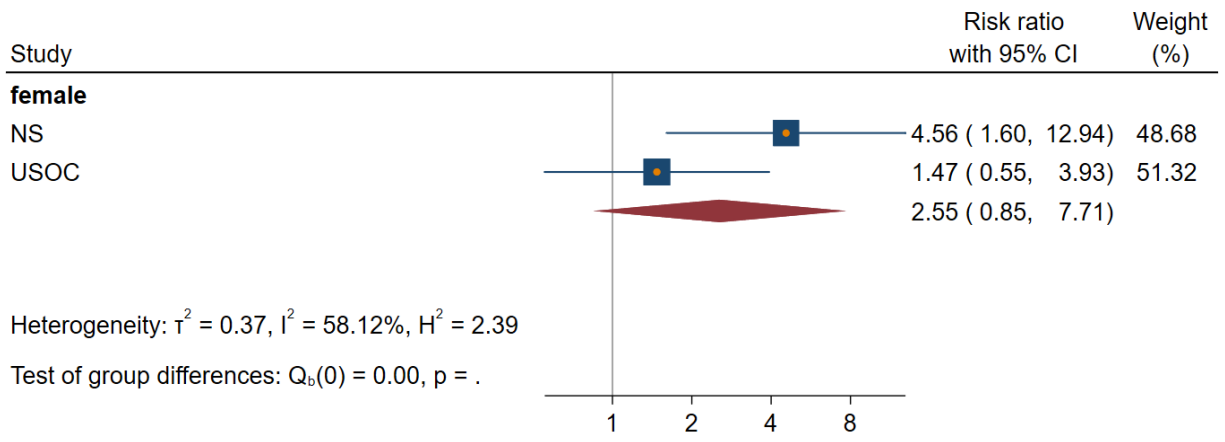

## Figure set 42: Smoking less

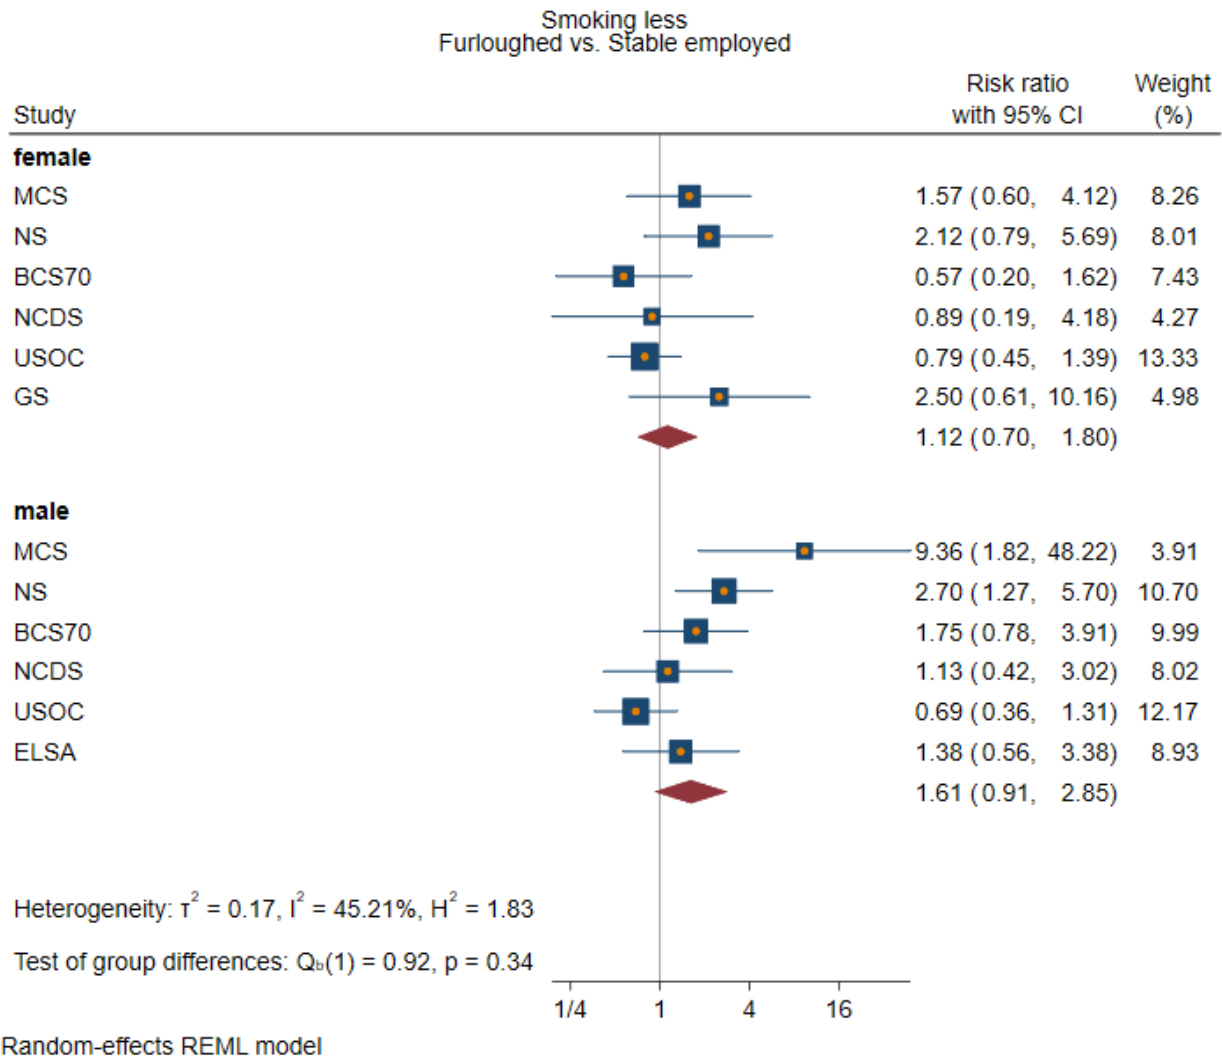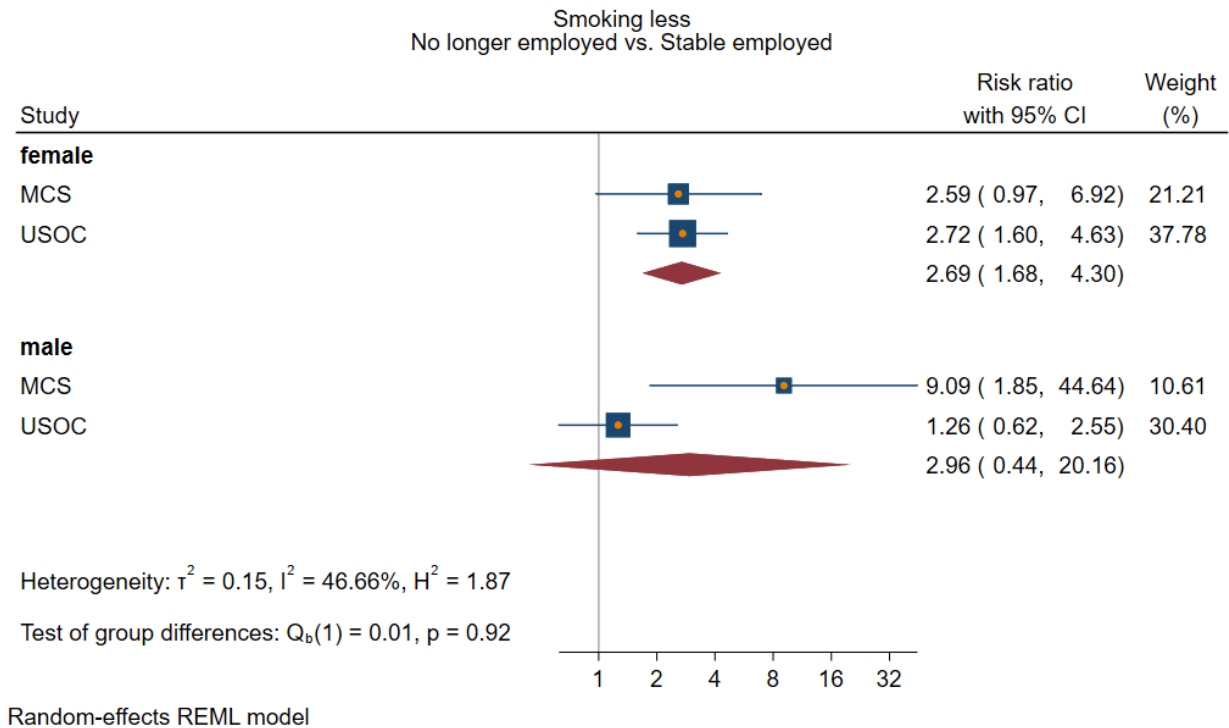

Smoking less  
Stable unemployed vs. Stable employed

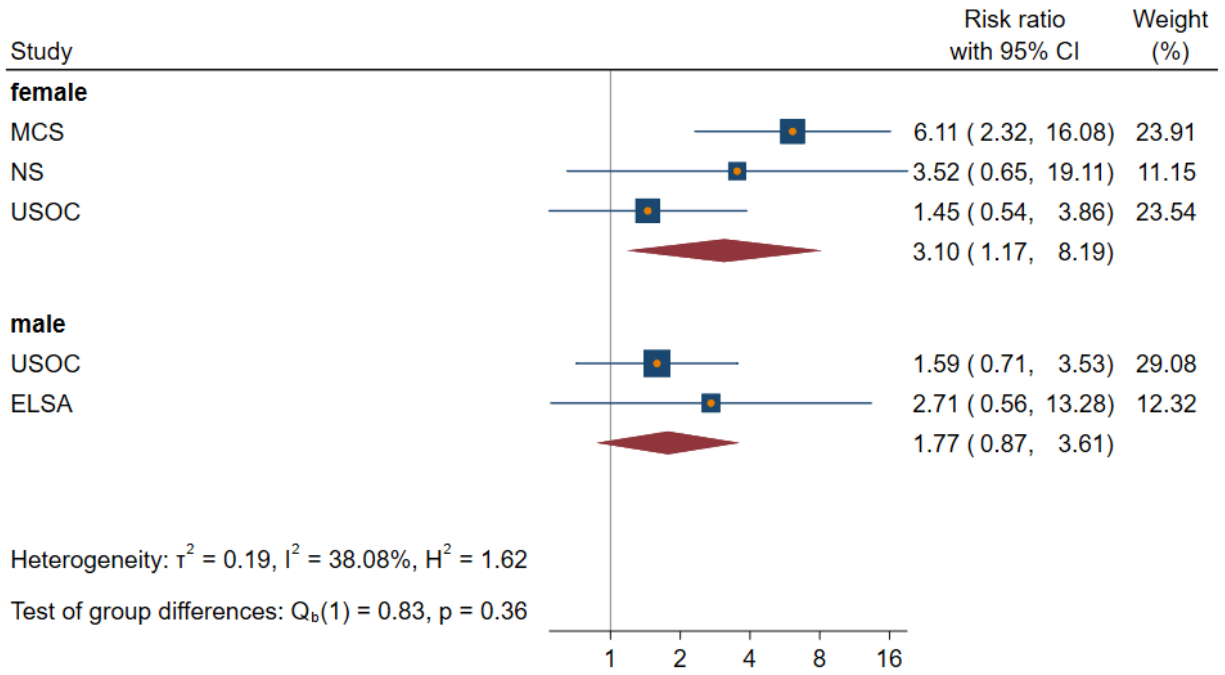

Random-effects REML model

## Figure set 43: Current vaper

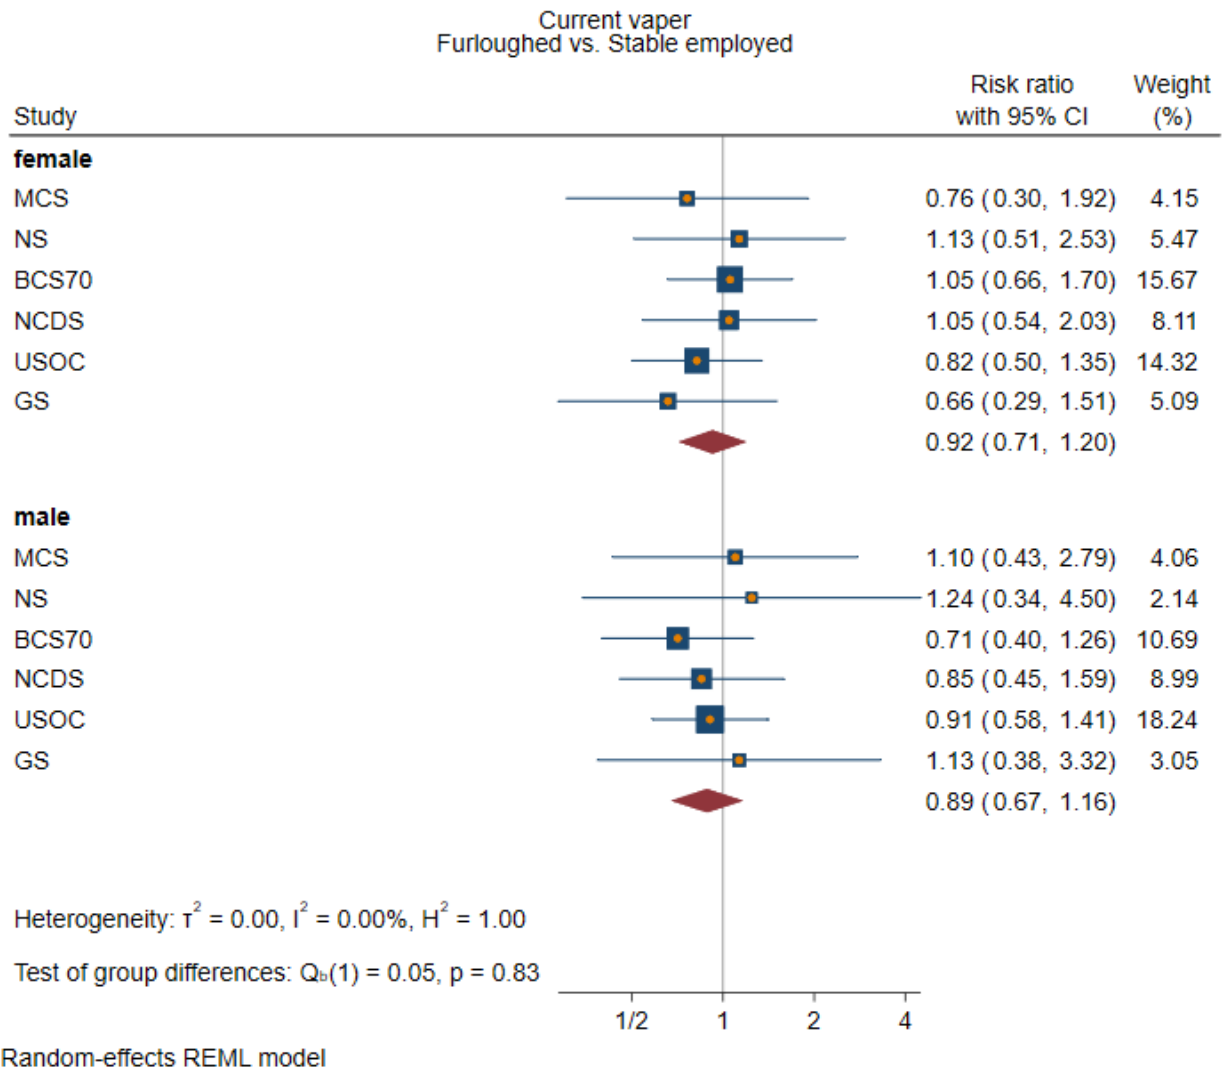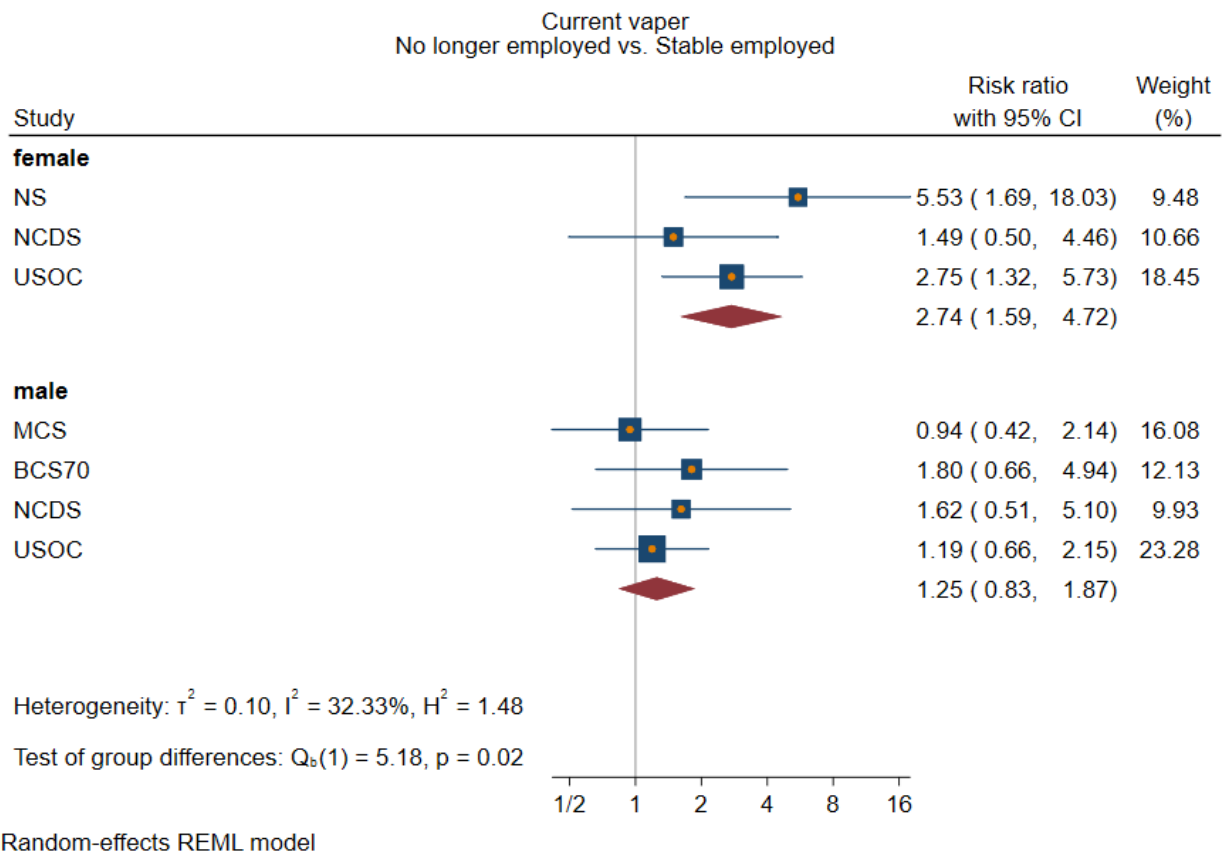

Current vaper  
Stable unemployed vs. Stable employed

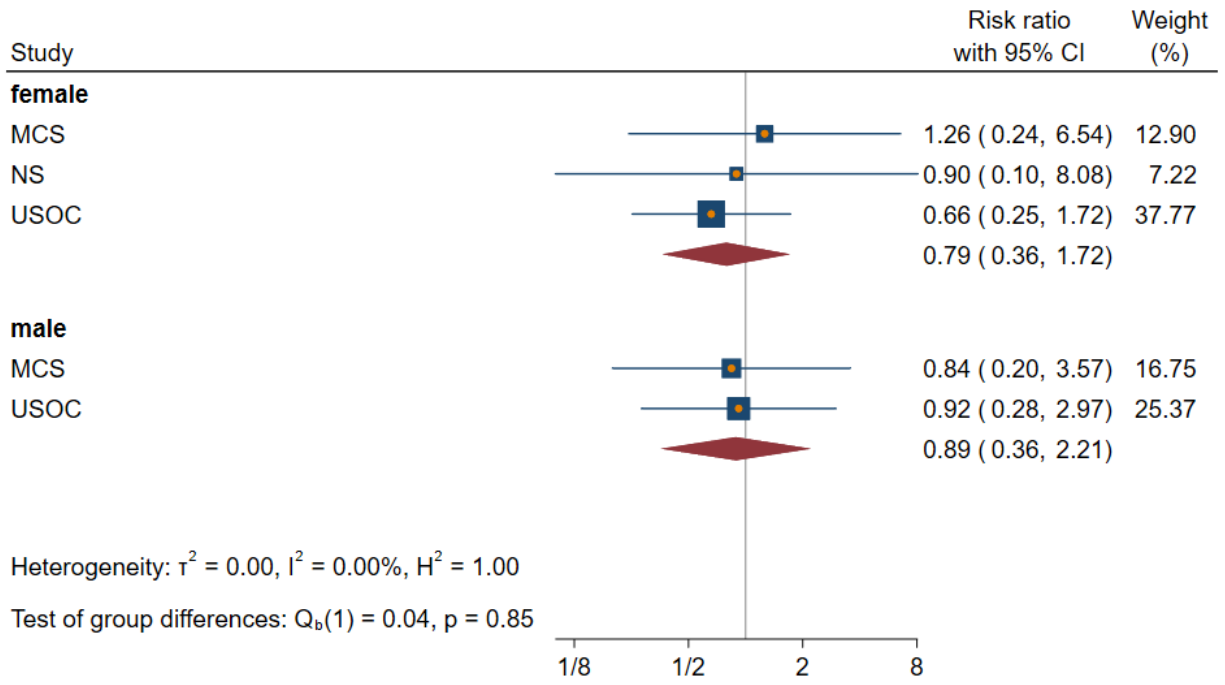

Random-effects REML model



## Figure set 44: Vaping more

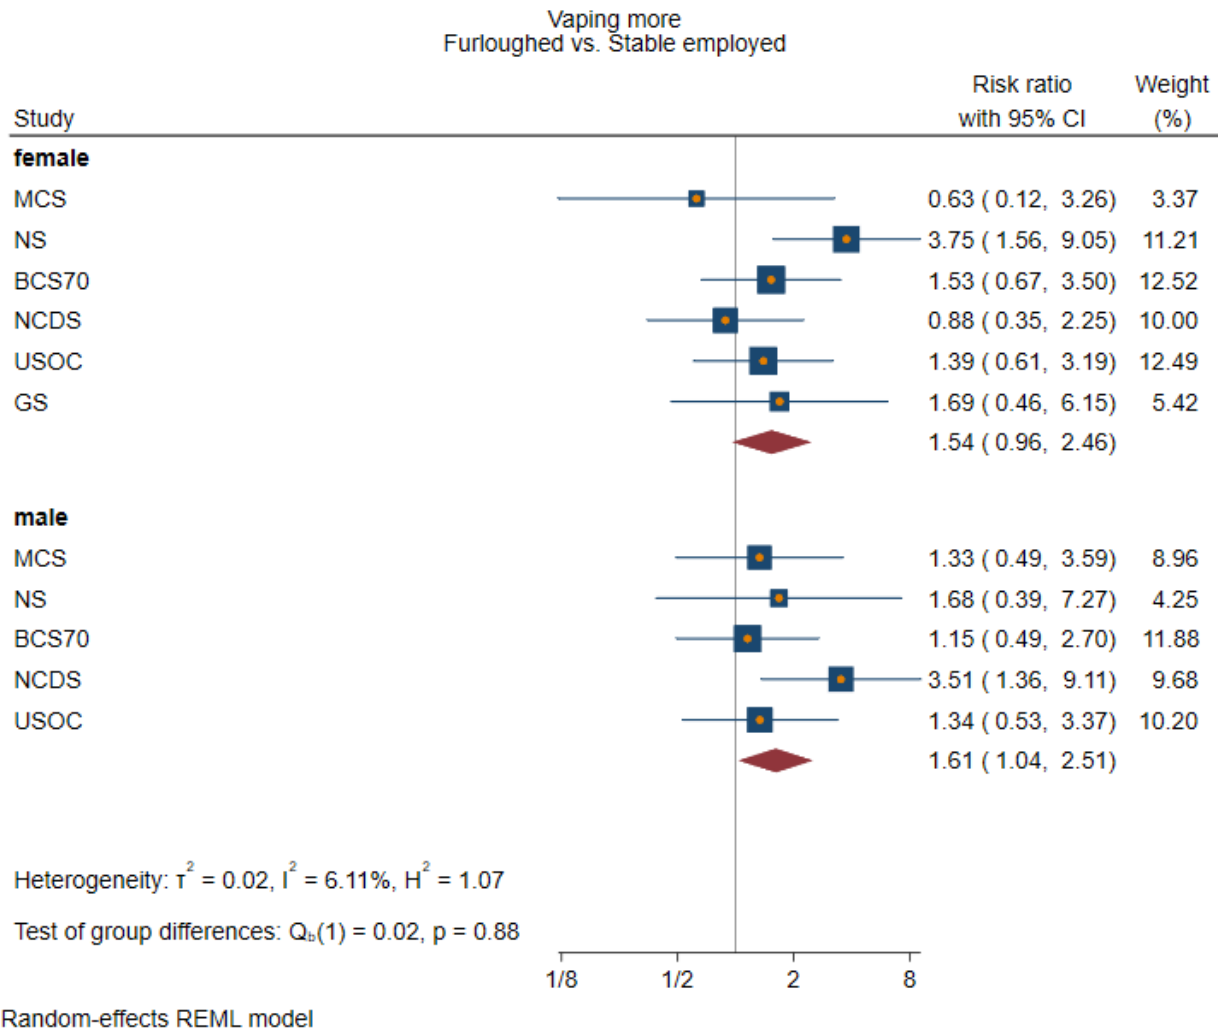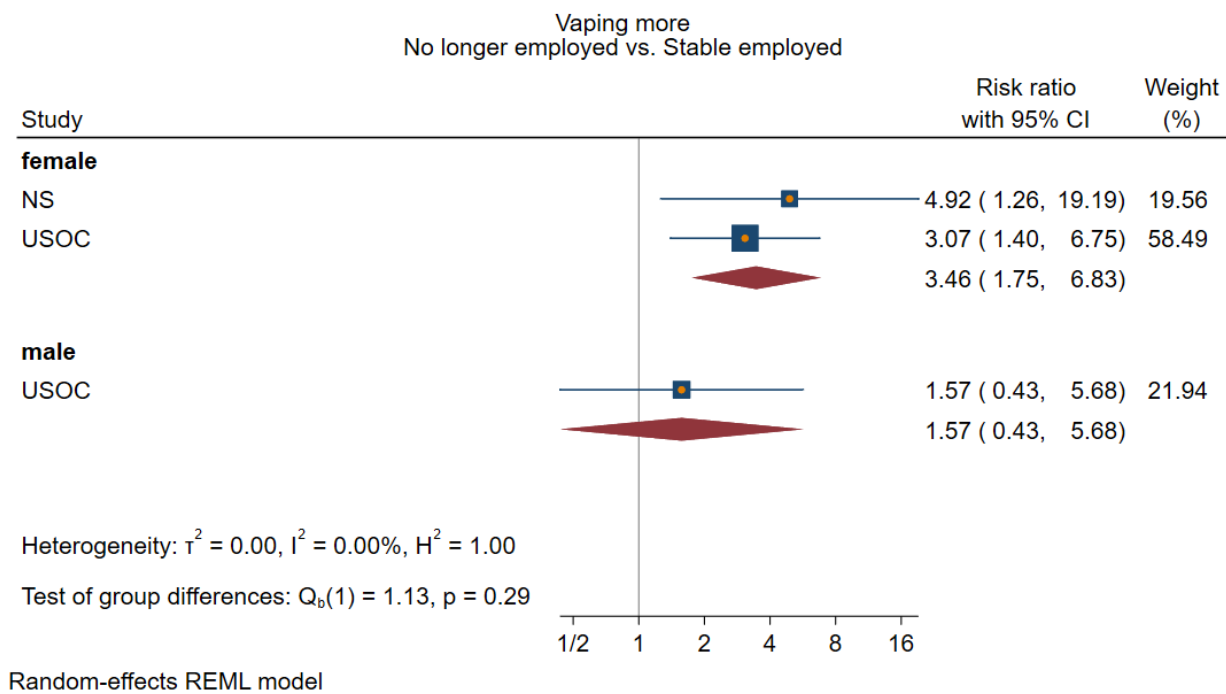

Vaping more  
Stable unemployed vs. Stable employed

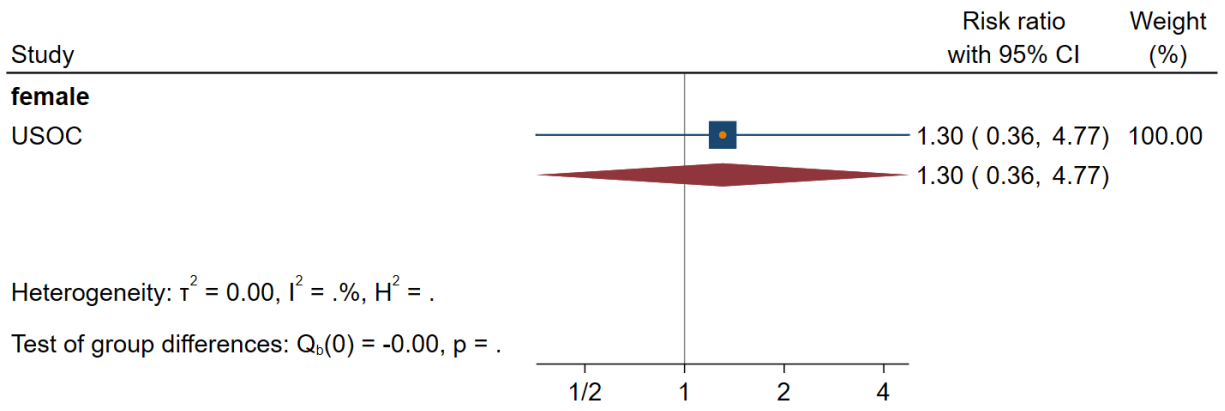

Random-effects REML model

## Figure set 45: Vaping less

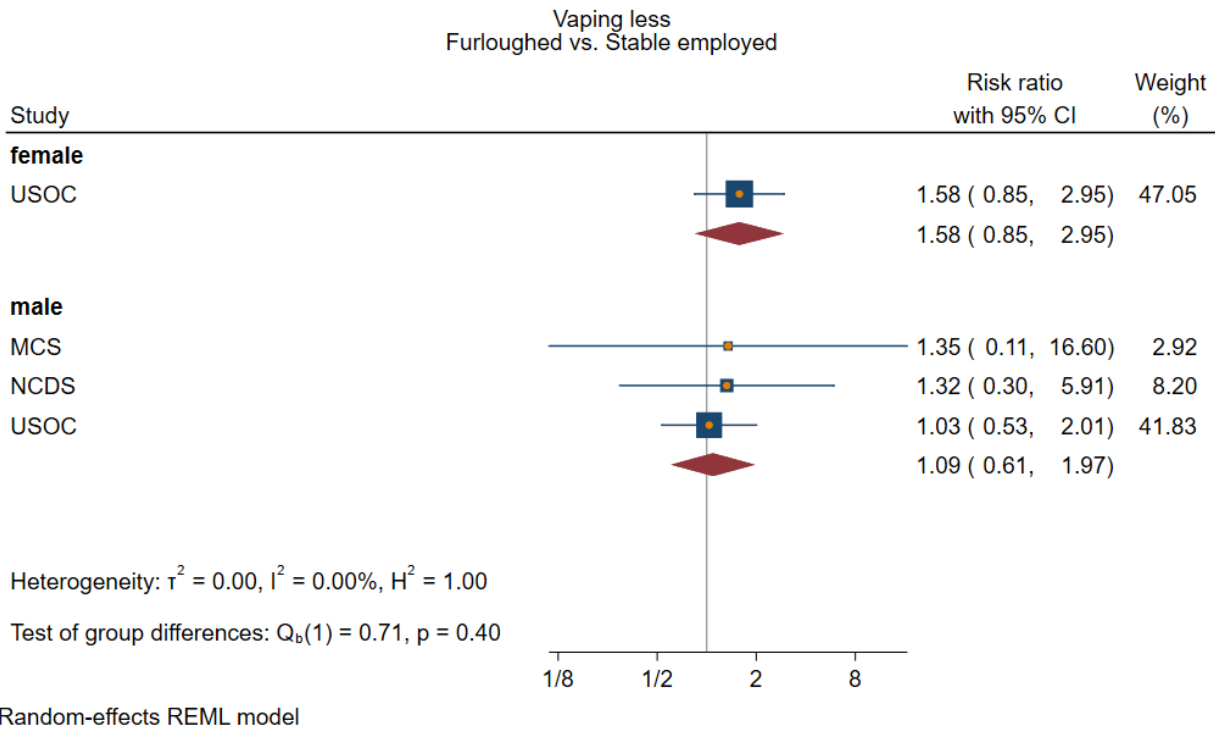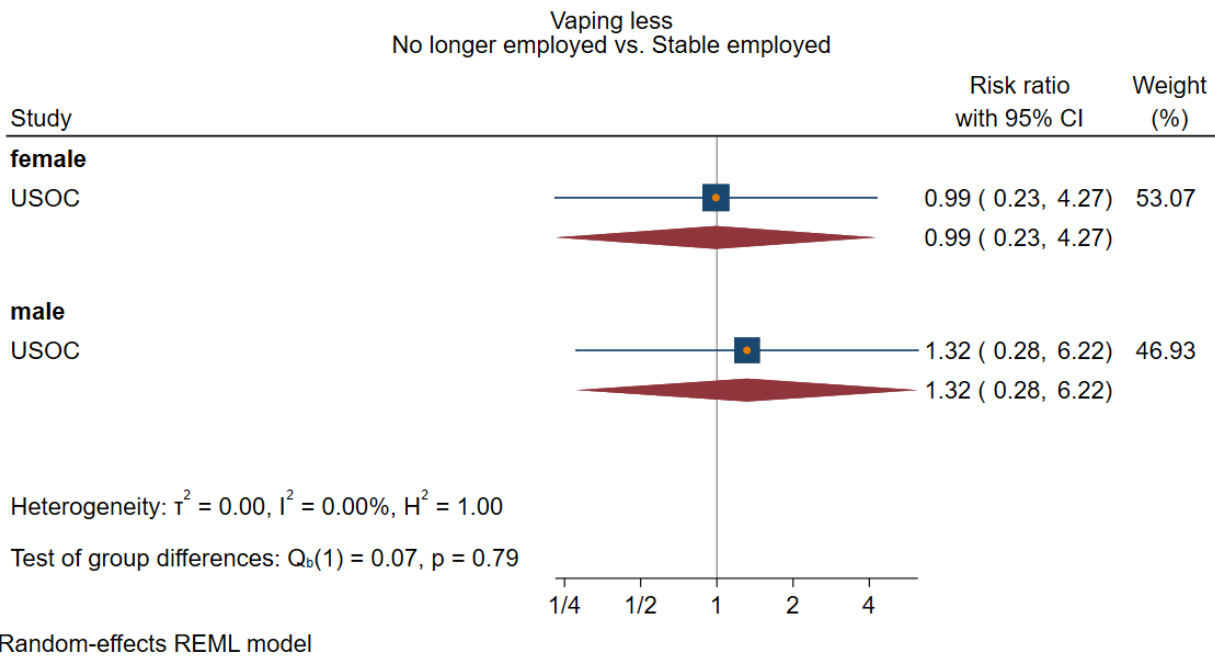

Vaping less  
Became employed vs. Stable employed

| Study         | Risk ratio<br>with 95% CI | Weight<br>(%) |
|---------------|---------------------------|---------------|
| <b>female</b> |                           |               |
| USOC          | 5.32 ( 1.42, 19.95)       | 100.00        |
|               | 5.32 ( 1.42, 19.95)       |               |

Heterogeneity:  $\tau^2 = 0.00$ ,  $I^2 = .\%$ ,  $H^2 = .$   
Test of group differences:  $Q_b(0) = -0.00$ ,  $p = .$

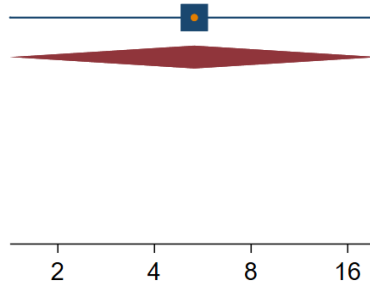

Random-effects REML model
